1 Running Head: SSVEPs AND FEATURE-BASED ATTENTION

2  
3 **Steady-state visually evoked potentials and feature-based attention: Pre-**  
4 **registered null results and a focused review of methodological considerations.**

5  
6 Kirsten C.S. Adam<sup>1,2</sup>, Lillian Chang<sup>3</sup>, Nicole Rangan<sup>1</sup>, & John T. Serences<sup>1,2,4</sup>

7  
8 <sup>1</sup> Department of Psychology, *University of California San Diego*

9 <sup>2</sup> Institute for Neural Computation, *University of California San Diego*

10 <sup>3</sup> Department of Neuroscience, *Georgetown University Medical Center*

11 <sup>4</sup> Neurosciences Graduate Program, *University of California San Diego*

12  
13 **Tables:** 0

14 **Figures:** 6

15 **Appendices:** 20

16  
17 **Keywords:** attention; EEG; SSVEP; feature-based attention

18  
19 **Contributions:** K.A. & J.S. planned the study. K.A., L.C., and N.R. collected data and  
20 performed the literature review. K.A. performed analyses and drafted the manuscript. All  
21 authors revised the manuscript.

22  
23 **Funding:** Research was supported by National Eye Institute grant R01 EY025872  
24 (J.S.) and National Institute of Mental Health grant 5T32-MH020002 (K.A.).

25  
26 **Pre-registration information:** We published a pre-registered research plan on the  
27 Open Science Framework prior to data collection (<https://osf.io/kfg9h/>).

28  
29 **Data availability:** Data and analysis code will be made available online on the Open  
30 Science Framework at <https://osf.io/ew7dv/> upon acceptance for publication.

31  
32 **Acknowledgements:** We thank Matteo d'Amico for additional assistance with data  
33 collection and Kelvin Lam for help as lab manager. We thank Rosanne Rademaker and  
34 Angus Chapman for sharing Psychtoolbox code that was adapted for use here.

35  
36 **Conflicts of interest:** none

37  
38 **Correspondence to:**

39 Kirsten C. S. Adam

40 University of California San Diego

41 9500 Gilman Drive, Mail Code: 0109

42 La Jolla, CA 92093-010

43 [kadam@ucsd.edu](mailto:kadam@ucsd.edu)

44

45  
46  
47  
48  
49  
50  
51  
52  
53  
54  
55  
56  
57  
58  
59  
60  
61  
62  
63  
64  
65  
66  
67  
68  
69  
70  
71  
72  
73  
74

**Abstract**

Feature-based attention is the ability to selectively attend to a particular feature (e.g., attend to red but not green items while looking for the ketchup bottle in your refrigerator), and steady-state visually evoked potentials (SSVEPs) measured from the human electroencephalogram (EEG) signal have been used to track the neural deployment of feature-based attention. Although many published studies suggest that we can use trial-by-trial cues to enhance relevant feature information (i.e., greater SSVEP response to the cued color), there is ongoing debate about whether participants may likewise use trial-by-trial cues to voluntarily ignore a particular feature. Here, we report the results of a pre-registered study in which participants either were cued to attend or to ignore a color. Counter to prior work, we found no attention-related modulation of the SSVEP response in either cue condition. However, positive control analyses revealed that participants paid some degree of attention to the cued color (i.e., we observed a greater P300 component to targets in the attended versus the unattended color). In light of these unexpected null results, we conducted a focused review of methodological considerations for studies of feature-based attention using SSVEPs. In the review, we quantify potentially important stimulus parameters that have been used in the past (e.g., stimulation frequency; trial counts) and we discuss the potential importance of these and other task factors (e.g., feature-based priming) for SSVEP studies.

75

76

## Introduction

77

78

79

80

81

82

83

84

85

86

87

88

89

90

91

92

93

94

95

96

97

98

99

100

101

102

103

104

Attending to a specific feature leads to systematic changes in the firing rates of neurons that encode the relevant feature space. For example, when looking for a ripe tomato, the firing rate of neurons tuned to red will be enhanced and the firing rate of neurons tuned to other features will be suppressed (e.g. responses to green; Bartsch et al., 2017; Ipata et al., 2006; Kiyonaga & Egner, 2016; Martinez-Trujillo & Treue, 2004; Störmer & Alvarez, 2014; Y. Wang et al., 2015). Although there is broad agreement that participants may learn to suppress irrelevant distractors with sufficient experience, there is disagreement about whether these behavioral suppression effects may be volitionally implemented on a trial-by-trial basis in response to an abstract cue (i.e., a “volitional account”), or if they instead are solely implemented via implicit or statistical learning mechanisms (i.e., a “priming-based” account). Consistent with a volitional or proactive account, some work has found that participants can learn to use a trial-by-trial cue to ignore a particular color (Arita et al., 2012; Carlisle & Nitka, 2019; Chang & Egeth, 2019; Conci et al., 2019; Moher & Egeth, 2012; Reeder et al., 2017; Z. Zhang et al., 2020, for nuanced reviews, see: Geng, 2014; Van Moorselaar & Slagter, 2020). However, other work has found that a specific color needs to be repeated over many trials to be suppressed, consistent with a priming or passive account (Cunningham & Egeth, 2016; Failing et al., 2019; Geng et al., 2019; Lamy et al., 2008; Stilwell & Vecera, 2019; Theeuwes, 2013; Vatterott & Vecera, 2012; B.-Y. Won & Geng, 2020).

Although many studies have examined the effects of feature-based suppression on later selection-related event-related potential (ERP) markers such as the N2pc and Pd (Arita et al., 2012; Carlisle & Nitka, 2019; Donohue et al., 2018; Sawaki & Luck, 2010), a key open question is whether trial-by-trial cues to ignore a color modulate earlier stages of visual processing. Recent work by Reeder and colleagues (Reeder et al., 2017) hypothesized that cues about which feature to ignore (i.e., “negative cues”) may down-regulate processing in visual cortex during the pre-stimulus period. Consistent with this hypothesis, they found that overall BOLD activity in early visual cortex was lower when participants were given a negative cue about the target color

105 than when participants were given either a positive or neutral cue. One limitation of this  
106 study, however, is that the authors were unable to test whether these univariate effects  
107 were actually feature-specific (as opposed to task-general anticipation). However,  
108 evidence from ERP studies suggests that feature-based attention modulates early  
109 visual processing in a feature-specific manner, as indexed by the P1 component (Moher  
110 et al., 2014; W. Zhang & Luck, 2009). Critically, however, these ERP studies used a  
111 design where the same target and distractor colors were repeated over many trial  
112 events. Thus, it is not clear whether feature-based attention can modulate early visual  
113 processing on a trial-by-trial basis, or if modulation of early visual processing is  
114 achieved primarily via inter-trial priming (Lamy & Kristjansson, 2013; Theeuwes, 2013).  
115 To attempt to address this gap, we conducted a pre-registered experiment in which we  
116 measured steady-state visually evoked potentials (SSVEPs) while giving participants  
117 trial-by-trial cues to suppress feature information.

118         When visual input flickers continuously at a given frequency (e.g., one stimulus at  
119 24 Hz and another at 30 Hz), the visually evoked potential in the electroencephalogram  
120 (EEG) signal reflects these “steady states” and time-frequency analyses can be used to  
121 derive estimates of the strength of neural responses to each stimulus (Adrian &  
122 Matthews, 1934; Regan, 1977). The amplitude of the frequency-specific SSVEP  
123 response has been shown to be modulated by both spatial and feature-based attention  
124 (higher amplitude when attended; Chen et al., 2003; Morgan et al., 1996; Müller et al.,  
125 1998, 2006; Pei et al., 2002). When participants are cued on a trial-by-trial basis to  
126 attend to a particular feature (e.g., color), the SSVEP amplitude is higher for the  
127 attended feature (Andersen et al., 2008; Chen et al., 2003; Müller et al., 2006). Further,  
128 the time-course of the SSVEP response to an attended color reveals an early  
129 enhancement followed by a suppressed response to the irrelevant, non-attended color  
130 (Andersen & Müller, 2010; Forschack et al., 2017).

131         Our primary manipulation was whether we cued participants to actively attend or  
132 to actively ignore a color on a trial-by-trial basis. We planned to use this method to track  
133 enhancement vs. suppression of the SSVEP response, and to test whether the time-  
134 course of enhancement and suppression varies with cue type. In the “attend cue”

135 condition, participants were cued about the relevant color to attend. This condition was  
136 expected to replicate prior work examining the time-course of feature-based attention  
137 using SSVEPs (Andersen & Müller, 2010), whereby enhancement of the attended color  
138 is followed by suppression of the ignored color. In the “ignore cue” condition, we instead  
139 cued participants about which color to *ignore*. If participants can use a cue to *directly*  
140 suppress a color on a trial-by-trial basis independent of target enhancement (i.e., a  
141 strong version of a volitional suppression account), we predicted that the time-course of  
142 enhancement vs. suppression of the SSVEP signal would be reduced or reversed (i.e.,  
143 that suppression of the cued, to-be-ignored color may happen even *prior to*  
144 enhancement of the other color). Alternatively, if participants recode the “ignore” cue to  
145 serve as an indirect “attend” cue (e.g., “Since I’m cued to ignore blue, that means I  
146 should attend red”; Beck & Hollingworth, 2015; Becker et al., 2015; Williams et al.,  
147 2020), then we predicted that target enhancement would always precede distractor  
148 suppression regardless of whether participants were cued to attend or ignore a  
149 particular color.

150 To preview the results, we were unable to fully test our hypotheses about the  
151 time-course of feature-based enhancement and suppression because we did not find  
152 evidence for an overall attention effect with our task procedures. Despite robust SSVEP  
153 amplitude (Cohen’s  $d > 5$ ), we observed no credible evidence that the SSVEP response  
154 was higher for an attended versus unattended color in either cue condition. Positive  
155 control analyses revealed that our lack of SSVEP effect was not due to a complete lack  
156 of attention to the attended color: ERP responses (P3) to the targets were modulated by  
157 attention as expected (Adamian et al., 2019; Andersen et al., 2013; Andersen, Fuchs, et  
158 al., 2011). In light of our inconclusive results, we also performed a focused  
159 methodological review of key potential task differences between our work and prior work  
160 that may have resulted in our failure to detect the effect of feature-based attention on  
161 SSVEP amplitude. We considered whether task factors such as stimulus flicker  
162 frequency, sample size, stimulus duration, and stimulus color might have impacted our  
163 ability to observe an attention effect. No single methodological factor that we considered  
164 neatly explains our lack of effect. Given our results and literature review, we propose

165 that future work is needed to systematically explore two key factors: (1) variation in  
166 feature-based attention effects across stimulus flicker frequencies and (2) the extent to  
167 which feature-based priming modulates SSVEP attention effects.

## 168 **Methods**

### 169 **Pre-registration and data availability**

170 We published a pre-registered research plan on the Open Science Framework  
171 prior to data collection (<https://osf.io/kfg9h/>). Our raw data and analysis code will be  
172 made available online on the Open Science Framework at <https://osf.io/ew7dv/> upon  
173 acceptance for publication.

### 174 **Participants**

175 Healthy volunteers ( $n = 32$ ; gender = 17 female, 15 male; mean age = 21.5 years  
176 [SD = 3.84, min = 18, max = 39]; handedness not recorded; corrected-to-normal visual  
177 acuity; normal color vision) participated in one 3.5 to 4 hour experimental session at the  
178 University of California San Diego (UCSD) campus, and were compensated \$15/hr.  
179 Procedures were approved by the UCSD Institutional Review Board, and all participants  
180 provided written informed consent. Inclusion criteria included normal or corrected-to-  
181 normal visual acuity, normal color vision, age between 18 and 60 years old, and no self-  
182 reported history of major neurological disorders (e.g., epilepsy, stroke). Data were  
183 excluded from analysis if there were fewer than 400 trials in either cue condition (either  
184 due to leaving the study early or after artifact rejection). A sample size of 24 was pre-  
185 registered, and artifact rejection criteria were pre-registered (see section “EEG  
186 preprocessing” below for more details). After running each participant, we checked  
187 whether the data were usable (i.e., sufficient number of artifact-free trials) so that we  
188 would know when to stop data collection. To reach our final sample size ( $n = 23$   
189 participants with usable data), we ran a total of 32 participants. Nine participants’ data  
190 were not used for the following reason: Subjects with an error in the task code ( $n = 3$ ),  
191 subjects who stopped the study early due to technical issues or to participants’  
192 preferences ( $n = 4$ ), subjects with too many artifacts ( $n = 2$ ). Note, we were one subject  
193 short of our pre-registered target sample size of 24 because data collection was  
194 suspended due to COVID-19. However, as our later power analyses will show, we do

195 not believe the addition of 1 further subject would have meaningfully altered our  
196 conclusions.

### 197 **Stimuli and Procedures**

198 **Heterochromatic flicker photometry task.** We chose perceptually equiluminant colors  
199 for each participant using a heterochromatic flicker photometry task. Participants viewed  
200 a large circular, flickering stimulus ( $8^\circ$  radius) on a black screen ( $0.08 \text{ cd/m}^2$ ). We  
201 generated 5 circular color spaces in CIELAB-space with varying luminance (circles  
202 centered on:  $L = 35-65$ ,  $a = 0$ ,  $b = 0$ ; 5 colors equally spaced around circle with radius =  
203 35) for use in the task. Participants matched each of the 5 colors to a medium-gray  
204 reference color (RGB = 105.6 105.6 105.6).

205 On each trial, the circular background was flickered between two different colors.  
206 One color was always medium-gray, and the other color was the to-be-matched color  
207 on that trial. The colors of circular background were phase reversed at a rate of 24 Hz,  
208 giving the appearance of a fast flicker when the subjective luminance values were not  
209 matched. On top of the flickering circular stimulus small oriented bars were drawn in the  
210 medium-gray reference color (the bars changed locations at a rate of 1Hz). The oriented  
211 bars served no purpose other than subjectively making it easier to discriminate fine-  
212 grained differences in luminance between the flickering colors (i.e., these bars gave  
213 secondary visual cues about equiluminance via the “minimally distinct border”  
214 phenomenon, Kaiser, 1988). Participants increased or decreased the luminance of the  
215 to-be-matched color (using up and down arrow keys) until the amount of perceived  
216 flicker was minimized – the point of perceptual equiluminance. The luminance starting  
217 value of the to-be-matched color was chosen at random on each trial. Once satisfied  
218 with their response, the participant pressed spacebar to continue to the next trial. Each  
219 to-be-matched color was repeated 3 times (15 trials total).

220 **Feature-based attention task.** All stimuli were viewed on a luminance calibrated  
221 CRT monitor (1024 x 768 resolution, 120 Hz refresh rate) from a distance of  $\sim 50$  cm in a  
222 dimly lit room. Stimuli were generated using Matlab 2016a and the Psychophysics  
223 toolbox (Brainard, 1997; Kleiner et al., 2007; Pelli, 1997). Participants rested their chin  
224 on a chin-rest and fixated a central dot ( $0.15^\circ$  radius) throughout the experiment. The

225 stimulus was a circular aperture (radius =  $\sim 9.5^\circ$ ) filled with 120 oriented bars (each bar  
226  $\sim 1.1^\circ$  long and  $\sim 1^\circ$  wide). Bars were centered on a grid and separated by  $\sim 1$  bar length  
227 such that they never overlapped with one another. On each individual frame ( $\sim 8.33$  ms)  
228 this grid was randomly phase shifted ( $0:2\pi$  in x and y coordinates) and rotated ( $1:360^\circ$ ),  
229 thus giving the appearance of random flicker. To achieve Steady State Visually Evoked  
230 Potentials (SSVEP) half of the bars flickered at 24 Hz (3 frames on, 2 frames off) and  
231 the other half flickered at 30 Hz (2 frames on, 2 frames off). Due to the jittered rotation  
232 of bar positions and to the random assignment of colors to bars on each "on" frame, this  
233 means that the individual pixels that were "on" for each color varied from frame to  
234 frame. The unpredictable nature of each bar's exact position is thus quite similar to  
235 unpredictable stimuli that have been used in past work (e.g., Andersen et al., 2008). For  
236 each "off frame" no bars of that color were shown (e.g., if 24 Hz had an "on" frame and  
237 30 Hz had an "off" frame, then only 60 out of 120 bars would be shown on the black  
238 background). If both the 24 Hz and 30 Hz bars were "off", then a black screen would be  
239 shown on that frame. See Appendix A for an illustration of some example frame-by-  
240 frame screenshots of the stimuli.

241 On each trial (Figure 1), the participants viewed the stimulus array of flickering,  
242 randomly oriented bars presented on a black background ( $0.08$  cd/m<sup>2</sup>). Half of these  
243 bars were shown in one color (randomly chosen from the 5 possible colors) and the  
244 other half were in another randomly chosen color (with the constraint that the two sets  
245 of bars must be two different colors). During an initial baseline ( $1,333$  ms), participants  
246 viewed the flickering dots while they did not yet know which color to attend; during this  
247 baseline, the fixation point was a medium gray color (same as the reference color in the  
248 flicker photometry task). After the baseline, the fixation dot changed color, cuing the  
249 participants about which color to attend or ignore. In the "attend cue" condition, the color  
250 of the fixation point indicated which color should be attended. In the "ignore cue"  
251 condition, the color of the fixation point indicated which color should be ignored. These  
252 two conditions were blocked, and the order was counterbalanced across participants  
253 (further details below). During the stimulus presentation ( $2,000$  ms), participants  
254 monitored the relevant color for a brief "target event" ( $333$  ms). During this brief target



255 event, a percentage of lines in the relevant color will be coherent (iso-oriented).  
256 Critically, the orientation of each coherent target or distractor event was completely  
257 unpredictable (randomly chosen between 1-180 degrees); thus, participants could not  
258 attend to a particular orientation in advance in order to perform the task. A target event  
259 occurred on 50% of trials, and participants were instructed to press the spacebar as  
260 quickly as possible if they detected a target event. Importantly, physically identical  
261 events (iso-oriented lines in a random orientation, 333 ms) could also appear in the  
262 distractor color (50% of trials). Participants were instructed that they should only  
263 respond to target events; if they erroneously responded to the distractor event, the trial  
264 was scored as incorrect. The target and/or distractor events could begin as early as cue  
265 onset (0 ms) and no later than 1,667 ms after stimulus onset). Participants could make  
266 responses up to 1 second into the inter-trial interval. If both a target and distractor event  
267 were present, their onset times were separated by at least 333 ms.

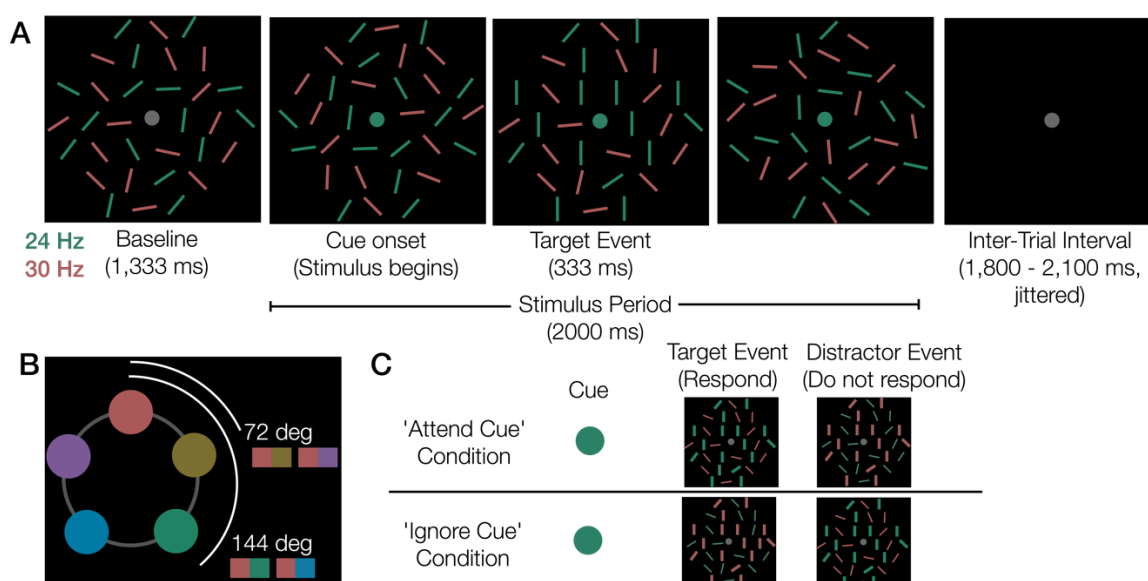

268  
269 **Figure 1. Feature-based attention task.** (A) Trial events in an example 'attend cue'  
270 trial where there is a target event. Note, this figure is a schematic and the stimuli are not  
271 drawn to scale. After a baseline period, participants were cued to attend or ignore one  
272 color via a change to the fixation point color. If participants noticed a target event (~75%  
273 iso-oriented lines in the to-be-attended color), they pressed the space bar. (B) Five  
274 colors were used, and these 5 colors appeared with equal probability. Thus, the target  
275 and distractor colors could be either 72 degrees or 144 degrees apart on a color wheel.  
276 This figure shows all possible color pairings if red was the target color. (C) Examples of  
277 cues, target events, and distractor events in the 2 main conditions. In the 'attend cue'

278 condition, participants made a response when the iso-oriented lines were the same  
279 color as the cue (target event) and did not respond if the iso-oriented lines occur on the  
280 uncued color (distractor event). In the 'ignore cue' condition, participants made a  
281 response when the iso-oriented lines occurred on the uncued color (target event), and  
282 they did not respond if the iso-oriented lines occurred on the cued color (distractor  
283 event). Note, all lines were of equal size in the real experiment; lines are shown at  
284 different widths here for easier visualization of the target and distractor colors. Here, the  
285 iso-oriented lines are drawn at vertical in all 4 examples. In the actual task, the iso-  
286 oriented lines could be any orientation (1-180).  
287

288 To ensure that the task was effortful for participants, the coherence of the lines in  
289 the target stimulus was adapted at the end of each block if behavior was outside the  
290 range of 70 - 85% correct. At the beginning of the session, the target had 50% coherent  
291 iso-oriented lines. If accuracy over the block of 80 trials was >85%, coherency  
292 decreased by 5%. If block accuracy was <70%, coherency increased by 5%. The  
293 maximum allowed coherence was 80% iso-oriented lines (so that participants would not  
294 be able to simply individuate and attend a single position to perform the task) and the  
295 minimum allowed coherence was 5%. The presence and absence of target and  
296 distractor events was balanced within each block yielding a total of 4 sub-conditions  
297 within each cue type (25% each): (1) target event + no distractor event, T1D0 (2) no  
298 target event + distractor event, T0D1 (3) target event + distractor event, T1D1 (4) no  
299 target event + no distractor event, T0D0.

300 Participants completed both task conditions (attend cue and ignore cue). The two  
301 conditions were blocked and counterbalanced within a session (i.e., half of participants  
302 performed the "attend cue" task for the first half of the session and the "ignore cue" task  
303 for the second half of the session.) Each block of 80 trials took approximately 6 min 50  
304 sec. Participants completed 18 blocks (9 per condition) for a total of 720 trials per cue  
305 condition. Note, we originally planned for 20 blocks (10 per condition) in the pre-  
306 registration, but the block number was reduced to 18 after the first few participants did  
307 not finish all blocks.

308 **Summary of deviations from the registered procedures.** As described in-line  
309 above, there were some minor deviations from the pre-registration: (1) We made  
310 changes to the pre-registered task code to fix errors that we discovered while running

311 the first 3 subjects (e.g., incorrect cues and behavioral feedback in the ‘ignore cue’  
312 condition). (2) We included code for eye-tracking, which allowed us to give participants  
313 automated real-time feedback if they blinked when they were not supposed to, i.e.,  
314 during the stimulus period. (3) We reduced the total number of experimental blocks from  
315 20 (10 per cue condition) to 18 (9 per cue condition) due to time constraints. (4) We had  
316 to prematurely stop data collection at  $n = 23$  out of 24 due to COVID-19. (5) We forgot  
317 to specify a specific statistical test for quantifying the robustness of overall SSVEPs in  
318 section “Checking that an SSVEP is elicited at the expected frequencies before  
319 collecting the full sample”, so we have described our justification for the statistical tests  
320 we present here. (6) Due to unanticipated failure to detect an overall attention effect, we  
321 performed additional non-pre-registered control analyses to attempt to rule out possible  
322 explanations of this null effect (see section: “Non pre-registered control analyses”  
323 below).

324

### 325 **EEG pre-processing**

326 Continuous EEG data were collected online from 64 Ag/AgCl active electrodes  
327 mounted in an elastic cap using a BioSemi ActiveTwo amplifier (Cortech Solutions,  
328 Wilmington, NC). An additional 8 external electrodes were placed on the left and right  
329 mastoids, above and below each eye (vertical EOG), and lateral to each eye (horizontal  
330 EOG). Continuous gaze-position data were collected from an SR Eyelink 1000+ eye-  
331 tracker (sampling rate: 1,000 Hz; SR Research, Ottawa, Ontario). We also measured  
332 stimulus timing with a photodiode affixed to the upper left-hand corner of the monitor (a  
333 white dot flickered at the to-be-attended color's frequency; the photodiode and this  
334 corner of the screen were covered with opaque black tape to ensure it was not visible).  
335 Data were collected with a sampling rate of 1024 Hz and were not downsampled offline.  
336 Data were saved unfiltered and unreferenced (see: Kappenman & Luck, 2010), then  
337 referenced offline to the algebraic average of the left and right mastoids, low-pass  
338 filtered ( $<80$  Hz) and high-pass filtered ( $>.01$  Hz). Artifacts were detected using  
339 automatic criteria described below, and the data were visually inspected to confirm that

340 the artifact rejection criteria worked as expected. We excluded subjects with fewer than  
341 400 trials remaining per cue condition.

342 **Eye movements and blinks.** We used the eye-tracking data and the  
343 HEOG/VEOG traces to detect blinks and eye movements. Blinks were detected on-line  
344 during the task using the eye tracker. If a blink was detected (i.e., missing gaze position  
345 returned from the eye tracker), the trial was immediately terminated and the participant  
346 was given feedback that they had blinked (i.e., the word “blink” was written in white text  
347 in the center of the screen). If eye-tracking data could not be successfully collected  
348 (e.g., calibration issues), the VEOG trace was used to detect blinks and/or eye  
349 movements during offline artifact rejection. To do so, we used a split-half sliding window  
350 step function (Luck, 2005; window size = 150 ms, step size = 10 ms, threshold = 30  
351 microvolts.) We also used a split-half sliding-window step function to check for eye-  
352 movements in the gaze-coordinate data from the eye-tracker (window size = 80 ms,  
353 step size = 10 ms, threshold = 1°) and in the horizontal electrooculogram (HEOG),  
354 window size = 150 ms, step size = 10 ms, threshold = 30 microvolts, and to detect  
355 blinks and/or eye movements in the vertical electrooculogram (VEOG),

356 **Drift, muscle artifacts, and blocking:** We checked for drift (e.g., skin potentials)  
357 by comparing the absolute change in voltage from the first quarter of the trial to the last  
358 quarter of the trial. If the change in voltage exceeded 200 microvolts, the trial was  
359 rejected for drift. In addition to slow drift, we also checked for sudden, step-like changes  
360 in voltage with a sliding window (window size = 250 ms, step size = 20 ms, threshold =  
361 200 microvolts). We excluded trials for muscle artifacts if any electrode had peak-to-  
362 peak amplitude greater than 200 microvolts within a 15 ms time window (step size = 10  
363 ms). We excluded trials for blocking if any electrode had ~120 ms during which all  
364 values within 1 microvolt of each other (sliding 200 ms window, step size = 50 ms).

365

366 **Pre-registered SSVEP analyses.**

367 **General method for SSVEP quantification.** We planned to quantify the SSVEP  
368 response by filtering the data with a Gaussian wavelet function. First, we calculated an  
369 average ERP for each condition at electrodes of interest (O1, Oz, O2). We chose these

370 3 electrodes based on large SSVEP modulations at these sites in prior work (e.g.,  
371 Itthipuripat et al., 2013; Müller et al., 2006). After calculating an ERP for each condition,  
372 we filtered the data with a Gaussian wavelet functions (frequency-domain) with .1  
373 fractional bandwidth to obtain frequency-domain coefficients from 20 to 35 Hz in 1-Hz  
374 steps. The frequency-domain Gaussian filters thus had a full-width half maximum  
375 (FWHM) that varied according to frequency, as specified by the 0.1 fractional bandwidth  
376 parameter (e.g., 1 Hz filter = FWHM of .1 Hz, 20 Hz filter = FWHM of 2 Hz, 30 Hz filter  
377 = FWHM of 3 Hz, etc). For a similar analytic approach see: (Canolty et al., 2006;  
378 Itthipuripat et al., 2013; Rungratsameetaweemana et al., 2018). Signal-to-noise ratio for  
379 each SSVEP frequency was calculated as the power at a given frequency divided by  
380 the average power of the 2 adjacent frequencies on each side. For example, SNR of 24  
381 Hz would be calculated as the power at 24 Hz divided by the average power at 22, 23,  
382 25, and 26 Hz. We also pre-registered an analysis plan for examining the time-course of  
383 SSVEP amplitude. However, because our data failed to satisfy pre-registered pre-  
384 requisite analyses, we do not report these time-course effects here (for completeness,  
385 we show the time-course of SNR in Figure S3).

386 **Checking that an SSVEP is elicited at the expected frequencies before**  
387 **collecting the full sample.** At  $n = 5$ , we planned to confirm that our task procedure  
388 successfully produced reliable SSVEP responses (i.e., check that we observed peaks at  
389 the correct stimulus flicker frequencies). If our task procedures failed to elicit an SSVEP  
390 at the expected frequencies, we had planned to stop data collection and alter the task to  
391 troubleshoot the problem (e.g., optimize timing, choose different flicker frequencies,  
392 make stimuli brighter, etc.). We planned to begin data collection over again if we failed  
393 this trouble-shooting step. Note, at this early stage we only verified if the basic method  
394 worked (SSVEP frequencies were robust): we did not test whether any hypothesized  
395 attention effects were present, as this could inflate our false discovery rate (Kravitz &  
396 Mitroff, 2017). Note, in the original pre-registration we failed to specify what test we  
397 would run to determine if SSVEP frequencies were robustly represented in the EEG  
398 signal. Theoretical chance for SNR would be 1, so the simplest test would be to  
399 compare the SNR for our stimulation frequencies (24 and 30 Hz) to 1 using a t-test,

400 which we report. However, it is often is better to compare to an empirical baseline with a  
401 reasonable amount of noise (Combrisson & Jerbi, 2015). As such, we opted to also  
402 compute an effect size comparing the SNR for our stimulation frequencies to all other  
403 frequencies (with the exception that we did not use frequencies +/- 2 Hz of 24 or 30 Hz  
404 as baseline values, since SNR was calculated as the power at frequency F divided by  
405 the power in the 2 adjacent 1-hz bins).

406 **Checking achieved power for the basic attention effect.** Without adequate  
407 power for the basic attention effect, we would not be able to robustly interpret the time-  
408 course of enhancement vs. suppression. At the full sample size, we thus planned to  
409 check whether we had sufficient achieved power for the overall attention effect ( $\geq 80\%$   
410 power for attended vs. ignored color collapsed across the entire stimulus period) as a  
411 prerequisite for interpreting the time-course of enhancement and suppression.

412 **Checking if a priori electrodes are reasonable.** We chose a priori to analyze  
413 the SSVEP at electrodes O1, Oz, and O2 (Itthipuripat et al., 2013;  
414 Rungratsameetaweemana et al., 2018), but we planned to plot the topography of  
415 SSVEP modulation across all electrodes to check that these a priori electrodes were  
416 responsive to the SSVEP manipulation. If these electrodes were not responsive to the  
417 SSVEP, we planned to perform a cluster-based permutation test to select a new set of  
418 electrodes.

419 **Checking if target and/or distractor presence alters results.** Our core  
420 analyses planned to use all trials for each condition (e.g., target event present or  
421 absent, distractor event present or absent). To confirm that the act of making a  
422 response did not contaminate the SSVEP results, we planned to compare SSVEPs for  
423 each of the 4 sub-conditions (the 4 possible combinations of target present/absent and  
424 distractor present/absent). We predicted that the main SSVEP attention effect (entire  
425 stimulus period) would not be different across these 4 conditions. But, if we found an  
426 effect of target or distractor presence on the main SSVEP attention effect, then we  
427 planned to use only the trials without target or distractor events for the time-course  
428 analyses (as has been done in prior work, e.g., Andersen & Müller, 2010).

429           **Checking if the distance between the target and distractor color alters**  
430 **results.** We planned to test whether the magnitude and time-course of attentional  
431 selection differs as a function of target-distractor color similarity ( $\sim 72^\circ$  vs.  $\sim 144^\circ$   
432 separation between the attended and ignored color). Prior work found that it was more  
433 difficult to simultaneously attend opposite colors ( $180^\circ$  apart) than to simultaneously  
434 attend two moderately-spaced colors ( $60^\circ$  apart) (Chapman et al., 2019; Geweke et al.,  
435 2018; Störmer & Alvarez, 2014). Given this result, we predicted that it should be easier  
436 to suppress a color that is drastically different from the target color (and behavioral  
437 accuracy should likewise be higher for the  $144^\circ$  condition).

438

439 **Additional non pre-registered SSVEP and ERP control analyses.**

440           We did not anticipate our failure to find an overall attention effect with these task  
441 procedures and set of pre-registered “sanity check” analyses described above. To  
442 further understand the lack of SSVEP attention effect, we performed additional non-pre-  
443 registered control analyses.

444           **Positive control: Frequency analysis of the photodiode voltage.** During the  
445 recording, a photodiode was used to ensure that the flicker frequencies were faithfully  
446 presented, and the photodiode recorded voltage fluctuations induced by a small white  
447 dot that flickered at the to-be-attended target frequency on each trial. The electrical  
448 activity from the photodiode was recorded as an additional “electrode” in the data matrix  
449 (with the structure: trials x electrodes x timepoints). Thus, we performed a fast Fourier  
450 transform (FFT, Matlab function “fft.m”) to ensure that the trial indexing and FFT aspects  
451 of our analysis were correct. If these aspects of the analysis were correct, we should  
452 expect a near-perfect modulation of photodiode FFT amplitude by attention condition as  
453 only the flicker frequency of the attended stimulus was tagged. For 1 subject, the  
454 photodiode was not plugged in (leaving 22 subjects for this analysis).

455           **Analysis control: Using a more similar frequency analysis procedure to**  
456 **prior published work.** Because we were interested in characterizing a time-course  
457 effect, we chose to use a Gaussian wavelet procedure to quantify power for each  
458 frequency of interest. However, given the lack of overall attention effect, we were not

459 able to meaningfully look at the time-course effects. Thus, we additionally used a fast  
460 Fourier transform (FFT) to measure SSVEP amplitude during the entire stimulus period.  
461 This method is more commonly used in prior published work (e.g., Andersen et al.,  
462 2008; Andersen & Müller, 2010). Following prior work, we used the entire stimulus  
463 epoch starting from 500 ms onward (500 ms – 2000 ms), we detrended the data, and  
464 we zero-padded this time window (2,048 points) to precisely estimate our frequencies.

465 **Positive control: Analysis of event-related potential (P3) for an attention**  
466 **effect.** Prior work has found that attention-related SSVEP modulations are  
467 accompanied by changes to event-related potentials (ERPs) associated with target  
468 selection and processing. To measure the P3, we calculated event-related potentials  
469 time-locked to the target or distractor onset (baselined to -200 ms to 0 ms relative to  
470 target onset). We included trials where there was only one target or distractor event on  
471 that trial, to avoid the possibility of overlap between the two signals. We calculated P3  
472 voltage at electrodes Pz and POz during the time window 450-700 ms after target  
473 onset, similar to prior work (Adamian et al., 2019; Andersen et al., 2013; Andersen,  
474 Fuchs, et al., 2011).

475

476

## Results

### 477 Behavior

478 Participants were overall accurate at the task (percent correct = 65.7%, d-prime =  
479 1.25), and were significantly above chance (percent correct >50%,  $p < .001$ ; d-prime >0,  
480  $p < .001$ ). There was no overall significant effect of cue condition (attend cue versus  
481 ignore cue) on performance,  $p = .85$ , but analysis of target-present trials suggested that  
482 participants could more quickly use attend cues than ignore cues ( $p < .05$  when the  
483 target appeared between 0 ms and 275 ms, but  $p > .05$  if the target appeared after 275  
484 ms; Appendix B).

485 Average percent correct was lower than our pre-specified target range of 70-  
486 85%, meaning that most participants saw targets and distractors that were maximally  
487 coherent (80% iso-oriented lines) for the majority of blocks (mean coherence of the  
488 target/distractor events = 73.7%, SD = 5.08%). Although overall accuracy was slightly



489 out of the range we had expected when planning the study, participants were well  
490 above chance and they saw targets with coherence values typical of prior work  
491 (Andersen et al., 2008; Andersen, Fuchs, et al., 2011; Andersen & Müller, 2010).

492

### 493 **Pre-registered SSVEP results**

494 We first confirmed that our SSVEP procedure was effective at eliciting robust,  
495 frequency-specific modulations of the EEG signal. After collecting the first 5 participants,  
496 we checked that overall SSVEP amplitudes for our two target frequencies (24 and 30  
497 Hz) were robust when collapsed across conditions (Fig 2A) before proceeding with data  
498 collection. We indeed found that the SSVEP signal was robust during the stimulus  
499 period even with  $n=5$  for both the 24 Hz frequency (mean SNR = 4.45, SD = .14, SNR >  
500 1:  $p < .001$ ) and for the 30 Hz frequency (mean SNR = 2.97, SD = .15, SNR > 1:  $p <$   
501  $.001$ ). These values were similar for the full  $n=23$  sample (Fig 2B). To compute an effect  
502 size, we compared SNR values for each target frequency (24 Hz and 30 Hz) to the SNR  
503 values for each baseline frequency (frequencies from 3-33 Hz not within  $\pm 2$  Hz of 24 or  
504 30 Hz). SNR values for the target frequencies were significantly higher than baseline,  
505 mean Cohen's  $d = 5.10$  (SD = 1.11) and 5.99 (SD = 2.66), respectively (See Appendix  
506 C). As planned, we also confirmed that the electrodes we selected *a priori* (O1, Oz, and  
507 O2) were reasonable given the topography of overall SSVEP amplitudes (i.e., they fell  
508 approximately centrally within the brightest portion of the heat map; Figure 2C-D).

509

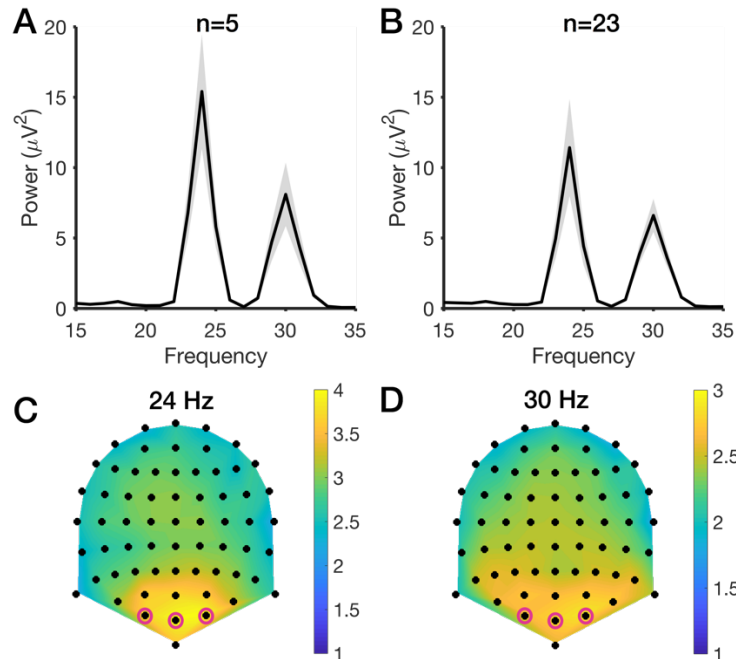

510

511 **Figure 2. SSVEP amplitude at the expected frequencies (collapsed across all**  
512 **experimental conditions).** (A) Power as a function of frequency during the stimulus  
513 period at electrodes O1, O2, and Oz for the first 5 participants. As expected, we  
514 observed robust peaks at the stimulated frequencies (24 and 30 Hz). (B) Power as a  
515 function of frequency for the stimulus period for the full sample (n=23). (C-D)  
516 Topography of signal to noise ratio values for 24 Hz (C) and 30 Hz (D) for all  
517 participants collapsed across all experimental conditions. Color scale indicates SNR. As  
518 expected, the *a priori* electrodes O1, O2, and Oz (magenta circles) showed robust SNR  
519 during the stimulus period.

520

521

522

Next, we checked for a basic attention effect, defined as a larger amplitude  
523 response evoked by the attended frequency compared to the ignored frequency). Note,  
524 for the sake of clarity, all conditions are translated into “attend” terminology. That is, if a  
525 participant was cued to “ignore blue” (24 Hz) during the “ignore cue” condition (and the  
526 other color was red and 30 Hz), this will instead be plotted as “attend red” (30 Hz).  
527 Figure 3 shows the Gaussian wavelet-derived frequency spectra during the stimulus  
528 period (500-2000 ms) as a function of cue type (attend versus ignore) and attended  
529 frequency (attend 24 Hz or attend 30 Hz). We found a main effect of measured  
530 frequency, whereby SNR was overall higher for 24 versus 30 Hz,  $F(1,22) = 57.89$ ,  $p <$   
531  $.001$ ,  $\eta^2_p = .73$ . However, we found no main effect of attended frequency ( $p = .27$ ) or

532 cue type ( $p = .83$ ), and we found no significant interactions ( $p >= .18$ ). Collapsed down  
533 to a paired t-test, the observed effect size for attended versus unattended SNR values  
534 was Cohen's  $d = .03$ . To detect an effect of this size with 80% power ( $1-\beta = .8$ ;  $\alpha = .05$ )  
535 would require a sample size  $n > 7,000^*$ . Given that we did not find an overall attention  
536 effect, we did not analyze or interpret analysis of the SSVEP time-course. However, for  
537 completeness we have shown the time course in Appendix D.

538

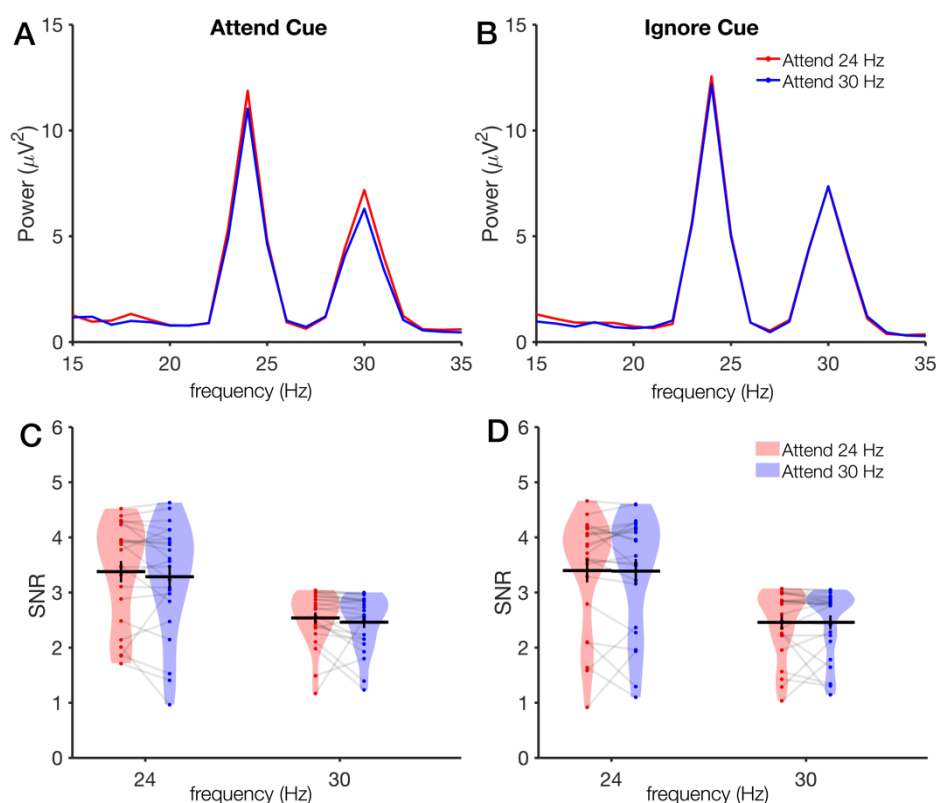

539

540 **Figure 3. Overall attention effect in the attend cue and ignore cue conditions.** (A-  
541 B) Frequency spectra in the attend cue (A) and ignore cue (B) conditions during the  
542 stimulus period. Although we observe expected peaks at 24 Hz and 30 Hz, this SSVEP  
543 response is not modulated by the attention manipulation. (C-D). Violin plots of the  
544 signal-to-noise ratio at the SSVEP frequencies in the attend cue (C) and ignore cue (D)  
545 conditions.

546

\*As we did not pre-register Bayesian analysis choices (e.g., choices about priors, etc.), we did not calculate a Bayes Factor for this pre-registered analysis. However, the post-hoc power analysis gives a sense of the degree to which this is a null effect.

547           Although we pre-registered that we would analyze all trials (those with and  
548 without target/distractor events), most prior studies have included only trials without any  
549 target or distractor events in the main SSVEP analysis (e.g., Andersen et al., 2008;  
550 Müller et al., 2006). To ensure that our null result was not due to this analysis choice,  
551 we also planned in our pre-registration to examine the SSVEP attention effect for trials  
552 with and without target and distractor events. When restricting our analysis to only trials  
553 without targets or distractors (25% of the 1440 trials, or 360 trials total before artifact  
554 rejection), we likewise found no attention effect. As before, we found a main effect of  
555 measured frequency (24 > 30 Hz),  $p < .001$ , but no effect of cue condition ( $p = .053$ ) or  
556 attended frequency ( $p = .073$ ), and, most critically, we found no interaction between  
557 measured frequency and attended frequency ( $p = .33$ ). Frequency spectra for all  
558 combinations of target and distractor presence are shown in Appendices E and F.

559           Finally, we also pre-registered that we would check whether the similarity of the  
560 target and distractor colors (72 versus 144 degrees apart on a circular color wheel;  
561 Figure 1B) would modulate the SSVEP attention effect. We likewise found that the  
562 similarity of the distractor colors did not significantly modulate the SSVEP response,  
563 and we found no attention effect (interaction of measured frequency and attended  
564 frequency) in either color distance condition ( $p \geq .26$ ; Appendix G).

565

### 566 **Non-pre-registered control analyses**

567           We conducted additional control analyses to rule out possible sources of our  
568 failure to find an attention effect. First, we examined the photodiode recording to rule out  
569 any failures due to trial indexing. The photodiode measured the luminance of a white  
570 dot that flickered at the attended frequency on each trial. As expected, performing an  
571 FFT on the photodiode time-course thus yielded near-perfect tracking of the attended  
572 frequency (Figure 4A-B,  $p < .001$ ). On the other hand, we again found null results for the  
573 main attention manipulation (Figure 4C-F) when using an FFT analysis that more  
574 closely followed prior work. We ran a repeated measures ANOVA on the signal to noise  
575 ratio values during the stimulus period, including the factors Measured Frequency (24  
576 Hz, 30 Hz), Attended Frequency (24 Hz, 30 Hz), and Cue Type (Attend, Ignore). We

577 found no main effect of measured frequency ( $p = .91$ ), attended frequency ( $p = .45$ ), or  
578 cue type ( $p = .54$ ), and we found no significant interactions ( $p \geq .38$ ). However, the  
579 average signal-to-noise ratio of the stimulus frequencies was overall robust ( $M = 4.45$ ,  
580  $SD = 1.45$ , greater than chance value of 1:  $p < 1 \times 10^{-9}$ ), so our inability to observe the  
581 attention effect was not due to lack of overall SSVEP signal. Likewise, we ran an  
582 additional analysis to ensure that our choice of pre-registered choice of SNR measure  
583 did not explain our null result (Appendix H).

584         Given that some work has reported significant effects only for the second  
585 harmonic (e.g., Kim et al., 2007; Vissers et al., 2017), we likewise examined SSVEP  
586 amplitude at 48 Hz and 60 Hz, with the caveat that the 60 Hz harmonic is contaminated  
587 by line noise (Appendices I and J). We found no significant attention effects for either  
588 second harmonic frequency. We also re-ran the FFT analysis with other electrode-  
589 selection methods to ensure our *a priori* choice of electrodes did not impede our ability  
590 to observe an effect. We found no evidence that electrode choice led to our null effect,  
591 as exploiting information from all 64 electrodes by implementing rhythmic entrainment  
592 source separation (RESS) likewise yielded null effects (Appendices K and L; M. X.  
593 Cohen & Gulbinaite, 2017). To ensure that inconsistent task performance did not lead to  
594 null effects, we repeated the main FFT analysis on only accurate trials. We likewise  
595 found null attention effects when analyzing only accurate trials (Appendix M).

596         Finally, we tested whether phase consistency, rather than power, may track  
597 attention in our task (e.g., Nunez et al., 2015; Tallon-Baudry et al., 1996). To do so, we  
598 performed an FFT on single trials rather than on condition-averaged waveforms, and we  
599 extracted single-trial phase values. We calculated a phase-locking index by computing  
600 mean-resultant vector length on each condition's histogram of single-trial phase values.  
601 Mean-resultant vector length ranges from 0 (fully random values) to 1 (perfectly identical  
602 values), for reference, see Zar (2010). We found no effect of attention on this phase-  
603 locking index (Appendix N).

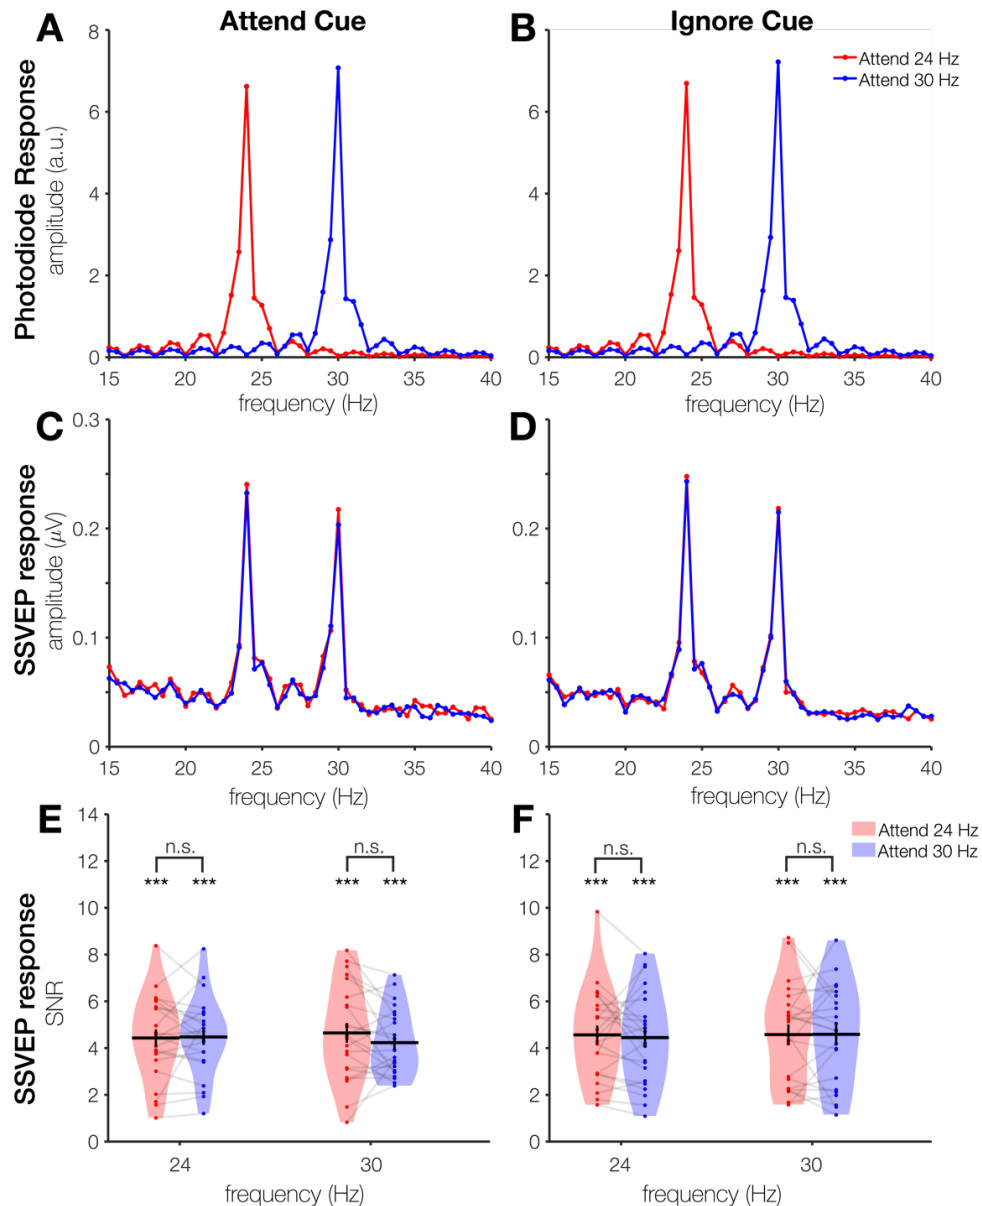

604

605 **Figure 4. FFT analysis of the photodiode and SSVEPs at attended and unattended**  
606 **frequencies during the stimulus period (500-2000 ms).** (A-B) As a positive control for  
607 our analysis pipeline, we performed an FFT analysis on the photodiode trace. The  
608 photodiode recorded a flickering white dot at the attended frequency on each trial. As  
609 expected, this provides a near-perfect tracking of the attended frequency in both the  
610 attend cue condition (A) and the ignore cue condition (B). (C-F) To ensure our null effect  
611 was not due to using Gaussian wavelets rather than an FFT, we repeated the main  
612 analysis with an FFT. Frequency spectra for the attend cue condition (C) and ignore cue  
613 condition (D) reveal an overall robust SSVEP signal at 24 Hz and 30 Hz, but no  
614 modulation by attention. Likewise, violin plots of signal-to-noise ratios again show robust  
615 signal but no modulation by attention in either the attend cue condition (E) or the ignore  
616 cue condition (F).

617  
618 **Positive control: Analysis of event-related potential (P3b) for an attention**  
619 **effect.** Consistent with prior work, we found a significantly larger P3 component for  
620 target onsets compared to distractor onsets (Figure 5). A repeated measures ANOVA  
621 with within-subjects factors cue type (attend cue or ignore cue) and event type (target or  
622 distractor onset) revealed a robust main effect of event type (target > distractor),  $F(1,22)$   
623  $= 51.64$ ,  $p < 1 \times 10^{-5}$ ,  $\eta^2_p = .70$ , and a main event of cue type (attend > ignore),  $F(1,22) =$   
624  $4.96$ ,  $p = .037$ ,  $\eta^2_p = .18$ , but no interaction between event type and cue type ( $p = .65$ ).  
625 Control analyses confirmed this P3 modulation was not due to differential rates of  
626 making a motor response for targets and distractors (Appendix O). The main effect of  
627 event type (target > distractor) remained when analyzing only trials where participants  
628 made a motor response ( $p < .001$ ). Thus, the P3 was overall larger for target than  
629 distractor events, consistent with prior work that found this ERP attention effect  
630 alongside an SSVEP attention effect.

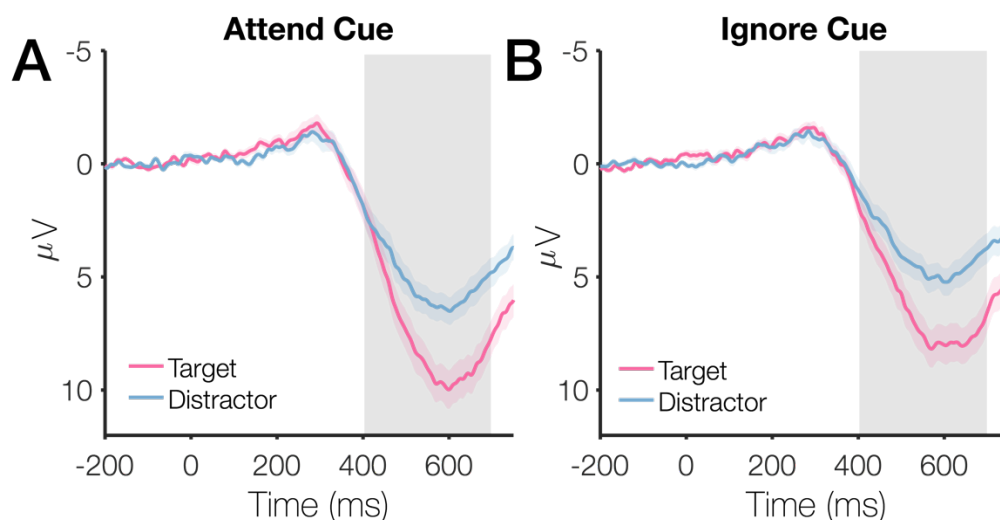

631  
632 **Figure 5. P3 amplitude at electrodes Pz and POz.** (A) P3 amplitude in the attend cue  
633 condition, as a function of whether the event onset (iso-oriented lines) was a target that  
634 should be reported or a distractor that should be ignored. (B) P3 amplitude in the ignore  
635 cue condition. Shaded error bars represent standard error of the mean; the gray  
636 rectangle indicates the time period used for the statistical tests.

637  
638  
639  
640  
641

642 **Focused review of feature-based attention studies using SSVEPs**

643 Given that our results are inconsistent with prior work, we conducted a focused review  
644 to try to pinpoint critical methodological differences that may have led to our failure to  
645 replicate a basic attention effect on SSVEP amplitude in this specific task. To do so, we  
646 first read review papers to identify an initial set of empirical studies employing a feature-  
647 based attention manipulation and SSVEPs (Andersen, Müller, et al., 2011; Norcia et al.,  
648 2015; Vialatte et al., 2010). From this initial set of papers, we used Google Scholar to  
649 check citations and citing papers for mention of the terms feature-based attention and  
650 SSVEPs. Our inclusion criteria included: (1) published journal article (2) healthy young  
651 adults (3) SSVEPs were measured from either an EEG or MEG signal and (4) a feature-  
652 based attention manipulation was included.

653 We defined “feature-based attention manipulation” as having the following  
654 characteristics: (1) Participants were cued to attend a feature(s) within a feature  
655 dimension (e.g., attend red, ignore blue) rather than across a feature dimension (e.g.  
656 attend contrast, ignore orientation), (2) The attended and ignored feature were both  
657 frequency-tagged in the same trials (rather than only 1 feature tagged per trial), (3)  
658 Each frequency was both “attended” and “ignored” on different trials, so that the  
659 amplitude of a given frequency could be examined as a function of attention, (4) The  
660 task could not be performed by adopting a strategy of splitting spatial attention to  
661 separate spatial locations.

662 After applying these screening criteria, some of the studies that we initially  
663 identified were excluded (brackets indicate exclusion reason(s)): Appelbaum & Norcia,  
664 2009 [1,4]; Boylan et al., 2019 [3]; Bridwell & Srinivasan, 2012 [2,3]; Clementz et al.,  
665 2008 [3]; Garcia et al., 2013 [1,4]; Hasan et al., 2017 [2]; Itthipuripat et al., 2019 [1];  
666 Talsma et al., 2006 [1,4]; Thigpen et al., 2019 [4]; Verghese et al., 2012 [1,4]).

667 We identified a total of 34 experiments from 28 unique papers (Appendices P-S)  
668 meeting our inclusion criteria. From these experiments, we quantified variables such as  
669 the number of subjects, number of trials, frequencies used, and the presence or  
670 absence of an attention effect in the expected direction (attended > ignored). If more  
671 than one group of participants was used (e.g., an older adults group) then we included



672 the study but only quantified results for the healthy young adult group (Quigley et al.,  
673 2010; Quigley & Müller, 2014).

674 **Task used in each study.**

675 The tasks used in these studies fell broadly into one of 4 categories: (1) a  
676 competing gratings task, (2) a whole-field flicker task, (3) a hemifield flicker task and (4)  
677 a central task with peripheral flicker.

678 In the competing gratings task (Appendix P), participants viewed a stream of  
679 centrally-presented, superimposed gratings (e.g., a red horizontal grating and a green  
680 vertical grating). Because colored, oriented gratings were typically used, participants  
681 could thus generally choose to attend based on either one or both features (color and/or  
682 orientation). Each grating flickered at its own frequency (e.g. green grating shown at  
683 7.41 Hz, red grating shown at 8.33 Hz, as in Chen et al., 2003). Because the gratings  
684 were superimposed, on any given frame only one of the two gratings was shown. On  
685 frames where both gratings should be presented according to their flicker frequencies, a  
686 hybrid “plaid” stimulus was shown. Studies using a competing gratings task include:  
687 (Allison et al., 2008; Chen et al., 2003; Keitel & Müller, 2016; J. Wang et al., 2007).

688 In the whole-field flicker task (Appendix Q), participants viewed a spatially global  
689 stimulus comprised of small, intermingled dots or lines. Typically, half of the dots or  
690 lines were presented in one feature (e.g., red) and the other half of the lines were  
691 presented in another (e.g., blue); each set of dots flickered at a unique frequency.  
692 Although the most common attended feature was color, some task variants included (1)  
693 attending high or low contrast stimuli (2) attending a particular orientation or (3)  
694 attending a particular conjunction of color and orientation. The whole-field flicker task  
695 was the most common task variant, and it is also most similar to the task performed  
696 here. Studies using a whole-field flicker task include: (Andersen et al., 2008, 2009,  
697 2012, 2015; Andersen & Müller, 2010; Forschack et al., 2017; Martinovic et al., 2018;  
698 Martinovic & Andersen, 2018; Müller et al., 2006; Quigley et al., 2010; Quigley & Müller,  
699 2014; Steinhauser & Andersen, 2019; D. Zhang et al., 2010)

700

701 In the hemifield flicker task, participants viewed a stimulus within each hemifield, and  
702 each stimulus was comprised of small, intermingled dots or lines. Often, these studies  
703 included both a feature-based attention manipulation and a spatial attention  
704 manipulation (e.g., attend red on the left-hand side). However, the feature-based  
705 attention task could not be achieved with spatial attention alone, as participants needed  
706 to attend to a particular color and ignore a distractor color within the attended hemifield.  
707 In addition, the unattended hemifield could often be used to track the spatially global  
708 spread of feature-based attention. Studies using a hemi-field flicker task include:  
709 (Adamian et al., 2019; Andersen et al., 2013; Andersen, Fuchs, et al., 2011; Müller et  
710 al., 2018; Störmer & Alvarez, 2014)

711 Finally, in the central task with peripheral flicker, participants performed a task  
712 near fixation (e.g., visual search), and feature-based attention was measured indirectly  
713 via a peripheral flickering stimulus (i.e., this design took advantage of the spatially  
714 global spread of feature-based attention, Sàenz et al., 2002, 2003; White & Carrasco,  
715 2011). Studies using a central task with peripheral flicker include: (Chu & D’Zmura,  
716 2019; Jiang et al., 2017; Painter et al., 2014, 2015).

717

### 718 **Sample Size, Trial Counts, and Stimulus Duration**

719 First, we examined whether insufficient power could have led to our failure to  
720 detect an attention effect. Both sample size and the number of trials per condition are  
721 critical for determining power (Baker et al., 2019; Boudewyn et al., 2018; Button et al.,  
722 2013; Button & Munafò, 2017; Clayson et al., 2019; Thigpen et al., 2017). The number  
723 of studies employing each task variant is plotted in Figure 6A, the number of subjects  
724 per experiment is plotted in Figure 6B, the number of trials per experiment is plotted in  
725 Figure 6C, and stimulus duration is plotted in Figure 6D. Bars are color coded according  
726 to whether each experiment overall found an expected attention effect (attended >  
727 ignored), a reverse attention effect (ignored > attended), mixed results across conditions  
728 within the experiment, or ambiguous results (3 studies: Pei et al., 2002: reported  
729 statistics for the harmonics but not the fundamental frequency; Allison et al., 2008:  
730 missing formal statistical tests; Martinovic et al., 2018: statistical tests measured if

731 attention effect differed between conditions, but did not formally test that the attention  
 732 effect was overall significant). Our study had  $N = 23$ , 1,440 total trials per subject (720  
 733 trials per cue condition), and a stimulus duration of 2 seconds. In comparison to the  
 734 literature, these factors are unlikely to explain our failure to find an effect. On average,  
 735 prior studies had a median sample size of  $N = 15$  (SD = 4.1, min = 9, max = 23) and a  
 736 median trial count of 440 (SD = 314.2, min = 8, max = 1600) and a median stimulus  
 737 duration of 4.1 sec (SD = 37.35, min = 1 sec, max = 120 sec). Likewise, our trial counts  
 738 were reasonable when we restricted our analysis to trials without targets or distractors  
 739 (360 trials total; 180 trials per condition) relative to this estimated value for the literature  
 740 (median = 96 trials per condition, SD = 95.6, min = 4, max = 400). Upon initially plotting  
 741 the data, we noticed that studies using the competing gratings task produced  
 742 inconsistent results, with as many experiments showing a mixture of effects across  
 743 conditions, overall reversed effects (ignored > attended), and null effects (2 studies in  
 744 each category). We think this inconsistency is most likely due to the below-average trial  
 745 counts for these studies (median of only ~8 trials) (Boudewyn et al., 2018).

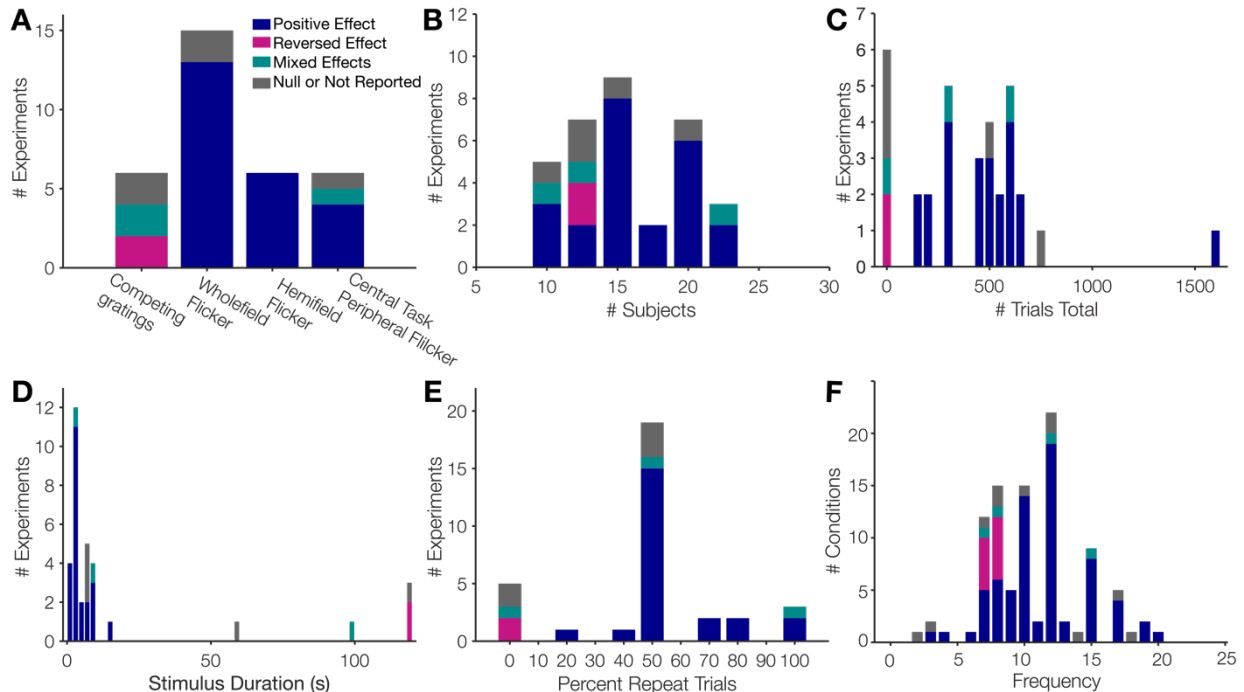

746

747 **Figure 6. Study characteristics from the literature review of feature-based**  
 748 **attention and SSVEPs.** (a) Number of experiments in each of the 4 task variants.  
 749 Different colors in the stacked bar graphs indicate whether the experiment found an

750 expected attention effect (attended > ignored), reverse effect (ignored > attended),  
751 mixed effects across conditions, or a null / ambiguously reported effect. (b) Number of  
752 participants. (c) Number of trials in the experiment (before artifact rejection or excluding  
753 trials with targets). (d) Stimulus duration. (e) Percentage of trials, on average, where the  
754 attended feature was repeated on the next trial. (f) Stimulation frequencies.

755

756 **Percentage of trials where an attended feature was repeated.**

757         Next, we examined the percentage of trials where the attended feature was  
758 repeated (e.g., if the attended color was red on trial  $n$ , what was the chance that red  
759 would also be attended on trial  $n+1$ ?). The priming-based account of feature-based  
760 attention posits that participants cannot use trial-by-trial cues to enhance a particular  
761 feature, but rather, feature-based enhancement happens automatically when a  
762 particular feature is repeated (Theeuwes, 2013). Thus, if there is a substantial  
763 proportion of trials where the repeated color was attended (e.g. with 2 possible colors,  
764 both the attended and ignored color will be repeated on 50% of trials), then the  
765 observed attentional enhancement effects might be driven primarily by incidental  
766 repetitions of attended features. In our study, we used 5 different colors to reduce the  
767 potential effect of inter-trial priming on the observed SSVEP attention effects (20%  
768 repeats of the attended color, 4% repeats of the attended color and the ignored color).  
769 We quantified the approximate percentage of trials on which an attended feature on one  
770 trial is repeated on the next trial (within a given block of trials). In some studies,  
771 participants were cued to attend more than one feature on a given trial, or they  
772 sometimes attended to a conjunction of features. In these cases, we calculated the  
773 expected number of repeats for either of the 2 attended features based on the total  
774 number of conditions (Andersen et al., 2008, 2013, 2015; Martinovic et al., 2018).

775         Figure 6E shows a histogram of the percentage of trials that repeated an  
776 attended feature. In two studies, the to-be-attended color was held constant on each  
777 block (100% repeats (Jiang et al., 2017; Painter et al., 2014). In the majority of the  
778 remaining studies, only two unique features were used so the percentage of trials where  
779 the attended feature was repeated was on average quite high (overall median = 50%,  
780 SD = 27.4%, min = 0%, max = 100%). Finally, in three studies, the attention conditions  
781 were perfectly alternated (0% repeat trials; Allison et al., 2008; Chen et al., 2003; J.

782 Wang et al., 2007). Consistent with a priming account, 81% of the studies with a high  
783 percentage of repeats showed a consistent positive attention effect, whereas none of  
784 the studies with 0% repeat trials showed a consistent positive attention effect. However,  
785 we think the inconsistent effects in the studies with 0% repeats might be equally  
786 attributed to their low trial counts (median = 8 trials per condition; Boudewyn et al.,  
787 2018). Only one study had a similar proportion of repeats as the present study (Störmer  
788 & Alvarez, 2014). Störmer and Alvarez found a significant attention effect while using 5  
789 unique colors (intermixed randomly from trial to trial). The findings by Störmer and  
790 Alvarez provide evidence against the feature-based priming account, and suggest the  
791 task factor “number of colors” cannot definitively explain our inability to observe an  
792 attention effect. However, given the lack of extant work using unpredictable color cues,  
793 we think future, systematic work is needed to determine the degree to which inter-trial  
794 priming effects may modulate the size and reliability of feature-based attention effects.

795

#### 796 **SSVEP Frequencies.**

797 We examined frequencies that have been most commonly used in the literature.  
798 In our study, we chose relatively high frequencies (24 and 30 Hz) in order to have  
799 increased temporal resolution for detecting potential time-course effects. In addition,  
800 some have argued that using higher frequencies as advantages for driving a more  
801 localized portion of visual cortex, as opposed to broadly driving visual, parietal and  
802 frontal cortex when using lower frequencies in the theta/alpha bands (i.e., ~7-12Hz;  
803 Ding et al., 2006; Srinivasan et al., 2006). For the purposes of temporal resolution,  
804 earlier work examining the time course of *spatial* attention with SSVEPs used the  
805 frequencies 20 and 28 Hz, (Müller et al., 1998). However, upon reviewing the feature-  
806 based attention literature, we found that our chosen frequencies were outside the range  
807 that has previously been used with a feature-based attention task (Figure 6F; median =  
808 10 Hz, SD = 3.6 Hz, min = 2.4 Hz, max = 19.75 Hz). Thus, it is possible that feature-  
809 based attention, unlike spatial attention, cannot be easily tracked with flicker  
810 frequencies above ~20 Hz. Although some studies have argued that feature-based  
811 attention effects do not qualitatively appear to vary with frequency (Martinovic et al.,

812 2018; Steinhauser & Andersen, 2019), the vast majority of reviewed studies only  
813 reported statistical significance of an overall attention effect collapsed across  
814 frequencies. Only a handful studies have reported statistical significance of individual  
815 frequencies (e.g., Chu & D’Zmura, 2019; Painter et al., 2014; Quigley & Müller, 2014;  
816 Steinhauser & Andersen, 2019). As such, future work is needed to systematically  
817 investigate the effect of frequency choice on feature-based attention effects, particularly  
818 for frequencies >20 Hz.

819

820

### **Task Type and Task Difficulty**

821 Finally, we examined whether the type of task and task difficulty may have  
822 influenced our ability to detect an attention effect. In particular, the specific targets that  
823 we used may differ slightly from prior work. In our experiment, participants detected a  
824 brief period (333 ms) of an on average ~75% coherent orientation (the coherent line  
825 orientation was a random, unpredictable direction, from 1-180 degrees). In this task,  
826 participants performed well above chance, but the task was still fairly challenging overall  
827 ( $d' = 1.25$ ). This raises the possibility that, compared to prior SSVEP studies, subjects  
828 were giving up on some percentage of the trials and that this contributed to the lack of  
829 attention effects.

830 For the reviewed papers in which participants detected a target within the  
831 flickering stimulus (“whole-field flicker task” and “hemifield flicker task”), we compiled  
832 information about participants’ accuracy, the duration of the target, the type of target,  
833 and the percentage of dots/lines that comprised the target (Table S5). We found that  
834 our particular task (detect a coherent orientation in the cued color) was slightly different  
835 from the other tasks that have been used. Two other prior studies did not use a  
836 behavioral task at all: participants were simply instructed to monitor a particular feature  
837 without making any overt response (Pei et al., 2002; D. Zhang et al., 2010). In three  
838 papers, participants attended to a brief (200 ms) luminance decrement in 20% of the  
839 attended dots (Adamian et al., 2019; Andersen et al., 2009, 2013). In the remaining  
840 papers, participants monitored for a brief coherent motion event (230 ms – 500 ms) in  
841 50-85% of the attended dots/lines (Andersen et al., 2008, 2012; Andersen & Müller,

842 2010; Forschack et al., 2017; Martinovic et al., 2018; Martinovic & Andersen, 2018;  
843 Müller et al., 2006, 2018; Quigley et al., 2010; Quigley & Müller, 2014; Steinhauser &  
844 Andersen, 2019; Störmer & Alvarez, 2014).

845         Although the particulars of the luminance and motion tasks subtly differ from our  
846 orientation task, it is not clear why SSVEPs would track attention when the target is a  
847 coherent luminance value or motion direction, but not when the target is a coherent  
848 orientation. For example, just like in the coherent motion direction tasks used by others,  
849 the angle of the coherent orientation in our task was completely unpredictable. Thus,  
850 participants in our task and in other tasks could not form a template of an orientation or  
851 motion direction they should attend in advance and instead had to attend to an  
852 orthogonal feature dimension such as color. In addition, in both prior tasks and the  
853 current task there were an equal number of coherent events in the cued and uncued  
854 color. If participants failed to attend to the cued color and instead responded to any  
855 orientation event, their performance in the task would be at chance.

856         Behavioral performance in the reviewed studies ranged from  $d' = 0.8$  to  $d' = 3.25$   
857 (Appendix T). In many studies, performance was quite high ( $d' > 2$  or accuracy  $> 90\%$ )  
858 relative to performance in our study (Adamian et al., 2019; Andersen et al., 2008, 2009,  
859 2012, 2013; Forschack et al., 2017; Müller et al., 2006; Quigley et al., 2010; Quigley &  
860 Müller, 2014; Steinhauser & Andersen, 2019). However, there were several studies  
861 where the authors found SSVEP attention effects despite overall lower behavioral  
862 performance values more comparable to our study ( $d'$  between 1 and 1.5; Andersen et  
863 al., 2015; Martinovic et al., 2018; Martinovic & Andersen, 2018). Sometimes, a more  
864 difficult task may actually be associated with increased attention effects: Martinovic and  
865 Andersen (2018) observed attention effects that were stronger in the subset of  
866 conditions with lower behavioral performance ( $d' = .8 - 1.5$ ) compared to conditions that  
867 were easier ( $d' > 2.25$ ).

868

869

## Discussion

870         In this pre-registered study, we sought to test whether cuing participants to  
871 *ignore* a particular color modulates the time-course of feature-based attention as

872 indexed by steady-state visually evoked potentials (SSVEPs). As a baseline point of  
873 comparison, we also included a condition in which participants were cued to *attend* a  
874 particular color. This “attend cue” condition was intended as a close replication of much  
875 prior work showing that SSVEP amplitudes are modulated by attention (greater  
876 amplitude for the attended feature; e.g., Andersen et al., 2008; Andersen & Müller,  
877 2010; Müller et al., 2006). However, we failed to replicate this basic overall attention  
878 effect; we found no difference in SSVEP amplitude as a function of attention in either  
879 the attend cue or the ignore cue condition. Thus, because we found no overall SSVEP  
880 attention effect, we were unable to test our hypotheses about how this attention effect  
881 was modulated by being cued to attend versus cued to ignore. Despite the lack of an  
882 SSVEP attention effect, positive control analyses indicated that that participants did  
883 successfully select the cued target color (i.e., we observed a significantly larger P3  
884 component for target events in the attended color than in the ignored color).

885         Given our failure to observe an effect of attention on SSVEP amplitude with our  
886 task procedures, we performed a focused review of the literature to quantify key  
887 methodological aspects of prior studies using SSVEPs to study feature-based attention.  
888 Based on this review, we concluded that sample size and trial counts likely did not  
889 explain our failure to find an effect; our sample size and trial counts were near the  
890 maximum values found in the surveyed literature. Likewise, the range of accuracy  
891 values found in the literature suggests that task difficulty does not explain our failure to  
892 find an attention effect. However, two key, intentional design differences may have  
893 hampered our ability to find an effect: (1) the number of colors in our stimulus set and  
894 (2) the frequencies used to generate the SSVEP.

895         The first key design difference in our study was the number colors in our stimulus  
896 set. We purposefully minimized the influence of inter-trial priming on our estimates of  
897 feature-based attention (Theeuwes, 2013) by using 5 unique colors and randomly  
898 choosing target and distractor colors on each trial. According to a priming account of  
899 feature-based attention, a relatively high proportion of trials where the attended color is  
900 repeated back-to-back could inflate or even entirely drive apparent feature-based  
901 attention effects. Using 5 colors somewhat protects against this possibility, because it



902 ensures that the attended color is repeated on 20% of trials, and both the  
903 attended/ignored colors are repeated on only 4% of trials. In the literature, we found that  
904 most studies had back-to-back color repeats on at least 50% of trials. It is thus plausible  
905 that inter-trial priming could contribute to observed attention differences in these  
906 studies. Contrary to a priming account, however, one study found robust feature-based  
907 attention effects using a set of 5 unique colors (Störmer & Alvarez, 2014), suggesting  
908 that participants can use a cue to direct feature-based attention even when the  
909 proportion of repeated trials is relatively low. To date, however, no study has directly  
910 manipulated the proportion of repeated trials or the number of possible stimulus colors  
911 in an SSVEP study. Given emerging evidence that history-driven effects play an  
912 important role in shaping both spatial and feature-based attentional selection (Adam &  
913 Serences, 2020; Awh et al., 2012; Failing et al., 2019; Geng et al., 2019; Kadel et al.,  
914 2017; B. Wang & Theeuwes, 2018a, 2018b; B.-Y. Won & Geng, 2020), we think that  
915 future work is needed to directly investigate whether and to what degree SSVEP  
916 estimates of feature-based attention are modulated by inter-trial priming.

917 The second key design difference in our study was the chosen set of  
918 frequencies. To ensure adequate temporal resolution to characterize time-course  
919 effects, we chose to use slightly higher frequencies (24 and 30 Hz). We believed these  
920 values would be reasonable, because an initial study of the time-course of spatial  
921 attention used SSVEP frequencies in a similar range (20 and 28 Hz; Müller et al., 1998).  
922 In addition, frequencies in the beta band (~15-30 Hz) have commonly been used in  
923 other SSVEP studies of spatial attention (Garcia et al., 2013; Kashiwase et al., 2012;  
924 Müller, Picton, et al., 1998; Müller & Hillyard, 2000; Toffanin et al., 2009; D.-O. Won et  
925 al., 2016), and SSVEPs are overall robust using a wide array of frequencies (at least 1  
926 to 50 Hz; Herrmann, 2001; Zhu et al., 2010). However, some spatial attention studies  
927 have found no attentional modulation of SSVEPs in the beta band (Antonov et al.,  
928 2020; Gulbinaite et al., 2019), or have found effects only for the second harmonic of  
929 beta band frequencies (Garcia et al., 2013; Kim et al., 2007; Vissers et al., 2017).  
930 Further, the SSVEP amplitude, estimated spatial extent of the SSVEP signal, and the  
931 size of spatial attention effects vary with frequency (Ding et al., 2006; Gulbinaite et al.,

932 2019; Herrmann, 2001). Given differences in the cortical processing of locations and  
933 features (M. R. Cohen & Maunsell, 2011; Haxby et al., 1994; Kastner & Ungerleider,  
934 2000; Mishkin & Ungerleider, 1982; Owen et al., 1996), and differences in SSVEP  
935 spatial extent and strength with frequency (Ding et al., 2006; Gulbinaite et al., 2019;  
936 Lithari et al., 2016), it is plausible that feature-based attention can only be tracked with a  
937 limited range of frequencies (e.g., frequencies near the alpha band). Future work will be  
938 needed to systematically investigate the effect of SSVEP frequency on feature-based  
939 attention.

940         It is perhaps puzzling that frequencies above 20 Hz have been commonly used in  
941 the spatial attention literature but have not been used in the feature-based attention  
942 literature. The truncation of the frequency distribution in the reviewed literature could be  
943 a piece of the “file drawer” in action. It is possible that other researchers likewise  
944 discovered that they were unable to track feature-based attention using certain  
945 frequencies, but that these null results were never published due to journals’ and  
946 authors’ biases toward publishing positive results (Cooper et al., 1997; Dickersin, 1990;  
947 Dickersin et al., 1992; Dwan et al., 2008; Ferguson & Heene, 2012; Franco et al., 2014;  
948 Rosenthal, 1979) and biases against publishing negative results (i.e., “censoring of null  
949 results”, Guan & Vandekerckhove, 2016; Sterling, 1959; Sterling et al., 1995). Thus, our  
950 results highlight the practical and theoretical importance of regularly publishing null  
951 results. On the practical side, if prior null results had been published, we may have  
952 better known which frequencies to use or avoid, and we would have been able to test  
953 our key hypotheses. On the theoretical side, our results highlight how seemingly  
954 unimportant null results can have implications for theory when viewed in the context of  
955 the broader literature. For example, if certain frequencies track spatial but not feature-  
956 based attention, this may inform our understanding of the brain networks and cognitive  
957 processes differentially modulated by flicker frequency (Ding et al., 2006; Srinivasan et  
958 al., 2006).

959         In short, we found no evidence that SSVEPs track the deployment of feature-  
960 based attention with our procedures, and future methodological work is needed to  
961 determine constraints on generalizability of the SSVEP method for tracking feature-

962 based attention. We performed a focused review of prior studies using SSVEPs to study  
963 feature-based attention, and from this review we identified two key factors (frequencies  
964 used; likelihood of inter-trial feature priming) that should be systematically investigated  
965 in future work.

## References

- 966 Adam, K. C. S., & Serences, J. T. (2020). *History-driven modulations of population codes in*  
967 *early visual cortex during visual search* [Preprint]. bioRxiv.  
968 <https://doi.org/10.1101/2020.09.30.321729>
- 969 Adamian, N., Slaustaitė, E., & Andersen, S. K. (2019). Top-Down Attention Is Limited Within but  
970 Not Between Feature Dimensions. *Journal of Cognitive Neuroscience*, *31*(8), 1173–  
971 1183. [https://doi.org/10.1162/jocn\\_a\\_01383](https://doi.org/10.1162/jocn_a_01383)
- 972 Adrian, E. D., & Matthews, B. H. C. (1934). The Berger Rhythm: Potential Changes from the  
973 Occipital Lobes in Man. *Brain*, *57*(4), 355–385.
- 974 Allison, B. Z., McFarland, D. J., Schalk, G., Zheng, S. D., Jackson, M. M., & Wolpaw, J. R.  
975 (2008). Towards an independent brain-computer interface using steady state visual  
976 evoked potentials. *Clinical Neurophysiology*, *119*(2), 399–408.  
977 <https://doi.org/10.1016/j.clinph.2007.09.121>
- 978 Andersen, S. K., Fuchs, S., & Müller, M. M. (2011). Effects of Feature-selective and Spatial  
979 Attention at Different Stages of Visual Processing. *Journal of Cognitive Neuroscience*,  
980 *23*(1), 238–246. <https://doi.org/10.1162/jocn.2009.21328>
- 981 Andersen, S. K., Hillyard, S. A., & Müller, M. M. (2008). Attention Facilitates Multiple Stimulus  
982 Features in Parallel in Human Visual Cortex. *Current Biology*, *18*(13), 1006–1009.  
983 <https://doi.org/10.1016/j.cub.2008.06.030>
- 984 Andersen, S. K., Hillyard, S. A., & Müller, M. M. (2013). Global Facilitation of Attended Features  
985 Is Obligatory and Restricts Divided Attention. *Journal of Neuroscience*, *33*(46), 18200–  
986 18207. <https://doi.org/10.1523/JNEUROSCI.1913-13.2013>
- 987 Andersen, S. K., & Müller, M. M. (2010). Behavioral performance follows the time course of  
988 neural facilitation and suppression during cued shifts of feature-selective attention.  
989 *Proceedings of the National Academy of Sciences*, *107*(31), 13878–13882.  
990 <https://doi.org/10.1073/pnas.1002436107>
- 991 Andersen, S. K., Müller, M. M., & Hillyard, S. A. (2009). Color-selective attention need not be  
992 mediated by spatial attention. *Journal of Vision*, *9*(6), 2–2. <https://doi.org/10.1167/9.6.2>
- 993 Andersen, S. K., Müller, M. M., & Hillyard, S. A. (2011). Tracking the allocation of attention in  
994 visual scenes with steady-state evoked potentials. In M. I. Posner (Ed.), *Cognitive*  
995 *Neuroscience of Attention* (2nd ed.). The Guilford Press.
- 996 Andersen, S. K., Müller, M. M., & Hillyard, S. A. (2015). Attentional Selection of Feature  
997 Conjunctions Is Accomplished by Parallel and Independent Selection of Single Features.  
998 *Journal of Neuroscience*, *35*(27), 9912–9919. [https://doi.org/10.1523/JNEUROSCI.5268-](https://doi.org/10.1523/JNEUROSCI.5268-14.2015)  
999 [14.2015](https://doi.org/10.1523/JNEUROSCI.5268-14.2015)
- 1000 Andersen, S. K., Müller, M. M., & Martinovic, J. (2012). Bottom-Up Biases in Feature-Selective  
1001 Attention. *Journal of Neuroscience*, *32*(47), 16953–16958.  
1002 <https://doi.org/10.1523/JNEUROSCI.1767-12.2012>

- 1003 Antonov, P. A., Chakravarthi, R., & Andersen, S. K. (2020). Too little, too late, and in the wrong  
1004 place: Alpha band activity does not reflect an active mechanism of selective attention.  
1005 *NeuroImage*, *219*, 117006. <https://doi.org/10.1016/j.neuroimage.2020.117006>
- 1006 Appelbaum, L. G., & Norcia, A. M. (2009). Attentive and pre-attentive aspects of figural  
1007 processing. *Journal of Vision*, *9*(11), 18–18. <https://doi.org/10.1167/9.11.18>
- 1008 Arita, J. T., Carlisle, N. B., & Woodman, G. F. (2012). Templates for rejection: Configuring  
1009 attention to ignore task-irrelevant features. *Journal of Experimental Psychology: Human  
1010 Perception and Performance*, *38*(3), 580–584. <https://doi.org/10.1037/a0027885>
- 1011 Awh, E., Belopolsky, A. V., & Theeuwes, J. (2012). Top-down versus bottom-up attentional  
1012 control: A failed theoretical dichotomy. *Trends in Cognitive Sciences*, *16*(8), 437–443.  
1013 <https://doi.org/10.1016/j.tics.2012.06.010>
- 1014 Baker, D. H., Vilidaite, G., Lygo, F. A., Smith, A. K., Flack, T. R., Gouws, A. D., & Andrews, T. J. J.  
1015 (2019). Power contours: Optimising sample size and precision in experimental  
1016 psychology and human neuroscience. *ArXiv:1902.06122 [q-Bio, Stat]*.  
1017 <http://arxiv.org/abs/1902.06122>
- 1018 Bartsch, M. V., Loewe, K., Merkel, C., Heinze, H.-J., Schoenfeld, M. A., Tsotsos, J. K., & Hopf,  
1019 J.-M. (2017). Attention to Color Sharpens Neural Population Tuning via Feedback  
1020 Processing in the Human Visual Cortex Hierarchy. *The Journal of Neuroscience*, *37*(43),  
1021 10346–10357. <https://doi.org/10.1523/JNEUROSCI.0666-17.2017>
- 1022 Beck, V. M., & Hollingworth, A. (2015). Evidence for negative feature guidance in visual search  
1023 is explained by spatial recoding. *Journal of Experimental Psychology: Human Perception  
1024 and Performance*, *41*(5), 1190–1196. <https://doi.org/10.1037/xhp0000109>
- 1025 Becker, M. W., Hemsteger, S., & Peltier, C. (2015). No templates for rejection: A failure to  
1026 configure attention to ignore task-irrelevant features. *Visual Cognition*, *23*(9–10), 1150–  
1027 1167. <https://doi.org/10.1080/13506285.2016.1149532>
- 1028 Boudewyn, M. A., Luck, S. J., Farrens, J. L., & Kappenman, E. S. (2018). How many trials does  
1029 it take to get a significant ERP effect? It depends. *Psychophysiology*, *55*(6), e13049.  
1030 <https://doi.org/10.1111/psyp.13049>
- 1031 Boylan, M. R., Kelly, M. N., Thigpen, N. N., & Keil, A. (2019). Attention to a threat-related  
1032 feature does not interfere with concurrent attentive feature selection. *Psychophysiology*,  
1033 *56*(6), e13332. <https://doi.org/10.1111/psyp.13332>
- 1034 Brainard, D. H. (1997). The Psychophysics Toolbox. *Spatial Vision*, *10*(4), 433–436.  
1035 <https://doi.org/10.1163/156856897X00357>
- 1036 Bridwell, D. A., & Srinivasan, R. (2012). Distinct Attention Networks for Feature Enhancement  
1037 and Suppression in Vision. *Psychological Science*, *23*(10), 1151–1158.  
1038 <https://doi.org/10.1177/09567976124440099>
- 1039 Button, K. S., Ioannidis, J. P. A., Mokrysz, C., Nosek, B. A., Flint, J., Robinson, E. S. J., &  
1040 Munafò, M. R. (2013). Power failure: Why small sample size undermines the reliability of  
1041 neuroscience. *Nature Reviews Neuroscience*, *14*(5), 365–376.  
1042 <https://doi.org/10.1038/nrn3475>
- 1043 Button, K. S., & Munafò, M. R. (2017). Powering Reproducible Research. In S. O. Lilienfeld & I.  
1044 D. Waldman (Eds.), *Psychological Science Under Scrutiny* (pp. 22–33). John Wiley &  
1045 Sons, Inc. <https://doi.org/10.1002/9781119095910.ch2>
- 1046 Canolty, R. T., Edwards, E., Dalal, S. S., Soltani, M., Nagarajan, S. S., Kirsch, H. E., Berger, M.  
1047 S., Barbaro, N. M., & Knight, R. T. (2006). High Gamma Power Is Phase-Locked to  
1048 Theta Oscillations in Human Neocortex. *Science*, *313*(5793), 1626–1628.  
1049 <https://doi.org/10.1126/science.1128115>

- 1050 Carlisle, N. B., & Nitka, A. W. (2019). Location-based explanations do not account for active  
1051 attentional suppression. *Visual Cognition*, 27(3–4), 305–316.  
1052 <https://doi.org/10.1080/13506285.2018.1553222>
- 1053 Chang, S., & Egeth, H. E. (2019). Enhancement and Suppression Flexibly Guide Attention.  
1054 *Psychological Science*, 30(12), 1724–1732. <https://doi.org/10.1177/0956797619878813>
- 1055 Chapman, A. F., Geweke, F., & Störmer, V. S. (2019). Feature-based attention resolves  
1056 differences in target-distractor similarity through multiple mechanisms. *Journal of Vision*,  
1057 19(10), 45a. <https://doi.org/10.1167/19.10.45a>
- 1058 Chen, Y., Seth, A. K., Gally, J. A., & Edelman, G. M. (2003). The power of human brain  
1059 magnetoencephalographic signals can be modulated up or down by changes in an  
1060 attentive visual task. *Proceedings of the National Academy of Sciences*, 100(6), 3501–  
1061 3506. <https://doi.org/10.1073/pnas.0337630100>
- 1062 Chu, V. C., & D’Zmura, M. (2019). Tracking feature-based attention. *Journal of Neural  
1063 Engineering*, 16(1), 016022. <https://doi.org/10.1088/1741-2552/aaed17>
- 1064 Clayson, P. E., Carbine, K. A., Baldwin, S. A., & Larson, M. J. (2019). Methodological reporting  
1065 behavior, sample sizes, and statistical power in studies of event-related potentials:  
1066 Barriers to reproducibility and replicability. *Psychophysiology*, 56(11).  
1067 <https://doi.org/10.1111/psyp.13437>
- 1068 Clementz, B. A., Wang, J., & Keil, A. (2008). Normal Electrocortical Facilitation But Abnormal  
1069 Target Identification during Visual Sustained Attention in Schizophrenia. *Journal of  
1070 Neuroscience*, 28(50), 13411–13418. <https://doi.org/10.1523/JNEUROSCI.4095-08.2008>
- 1071 Cohen, M. R., & Maunsell, J. H. R. (2011). Using Neuronal Populations to Study the  
1072 Mechanisms Underlying Spatial and Feature Attention. *Neuron*, 70(6), 1192–1204.  
1073 <https://doi.org/10.1016/j.neuron.2011.04.029>
- 1074 Cohen, M. X., & Gulbinaite, R. (2017). Rhythmic entrainment source separation: Optimizing  
1075 analyses of neural responses to rhythmic sensory stimulation. *NeuroImage*, 147, 43–56.  
1076 <https://doi.org/10.1016/j.neuroimage.2016.11.036>
- 1077 Combrisson, E., & Jerbi, K. (2015). Exceeding chance level by chance: The caveat of  
1078 theoretical chance levels in brain signal classification and statistical assessment of  
1079 decoding accuracy. *Journal of Neuroscience Methods*, 250, 126–136.  
1080 <https://doi.org/10.1016/j.jneumeth.2015.01.010>
- 1081 Conci, M., Deichsel, C., Müller, H. J., & Töllner, T. (2019). Feature guidance by negative  
1082 attentional templates depends on search difficulty. *Visual Cognition*, 27(3–4), 317–326.  
1083 <https://doi.org/10.1080/13506285.2019.1581316>
- 1084 Cooper, H., DeNeve, K., & Charlton, K. (1997). Finding the missing science: The fate of studies  
1085 submitted for review by a human subjects committee. *Psychological Methods*, 2(4), 447–  
1086 452. <https://doi.org/10.1037/1082-989X.2.4.447>
- 1087 Cunningham, C. A., & Egeth, H. E. (2016). Taming the White Bear: Initial Costs and Eventual  
1088 Benefits of Distractor Inhibition. *Psychological Science*, 27(4), 476–485.  
1089 <https://doi.org/10.1177/0956797615626564>
- 1090 Dickersin, Kay. (1990). The Existence of Publication Bias and Risk Factors for Its Occurrence.  
1091 *JAMA: The Journal of the American Medical Association*, 263(10), 1385.  
1092 <https://doi.org/10.1001/jama.1990.03440100097014>
- 1093 Dickersin, Kay, Min, Y. I., & Meinert, C. L. (1992). Factors influencing publication of research  
1094 results. Follow-up of applications submitted to two institutional review boards. *JAMA*,  
1095 267(3), 374–378.
- 1096 Ding, J., Sperling, G., & Srinivasan, R. (2006). Attentional Modulation of SSVEP Power  
1097 Depends on the Network Tagged by the Flicker Frequency. *Cerebral Cortex*, 16(7),  
1098 1016–1029. <https://doi.org/10.1093/cercor/bhj044>

- 1099 Donohue, S. E., Bartsch, M. V., Heinze, H.-J., Schoenfeld, M. A., & Hopf, J.-M. (2018). Cortical  
1100 Mechanisms of Prioritizing Selection for Rejection in Visual Search. *The Journal of*  
1101 *Neuroscience*, *38*(20), 4738–4748. <https://doi.org/10.1523/JNEUROSCI.2407-17.2018>
- 1102 Dwan, K., Altman, D. G., Arnaiz, J. A., Bloom, J., Chan, A.-W., Cronin, E., Decullier, E.,  
1103 Easterbrook, P. J., Von Elm, E., Gamble, C., Gherzi, D., Ioannidis, J. P. A., Simes, J., &  
1104 Williamson, P. R. (2008). Systematic Review of the Empirical Evidence of Study  
1105 Publication Bias and Outcome Reporting Bias. *PLoS ONE*, *3*(8), e3081.  
1106 <https://doi.org/10.1371/journal.pone.0003081>
- 1107 Failing, M., Feldmann-Wüstefeld, T., Wang, B., Olivers, C., & Theeuwes, J. (2019). Statistical  
1108 regularities induce spatial as well as feature-specific suppression. *Journal of*  
1109 *Experimental Psychology: Human Perception and Performance*, *45*(10), 1291–1303.  
1110 <https://doi.org/10.1037/xhp0000660>
- 1111 Ferguson, C. J., & Heene, M. (2012). A Vast Graveyard of Undead Theories: Publication Bias  
1112 and Psychological Science's Aversion to the Null. *Perspectives on Psychological*  
1113 *Science*, *7*(6), 555–561. <https://doi.org/10.1177/1745691612459059>
- 1114 Forschack, N., Andersen, S. K., & Müller, M. M. (2017). Global Enhancement but Local  
1115 Suppression in Feature-based Attention. *Journal of Cognitive Neuroscience*, *29*(4), 619–  
1116 627. [https://doi.org/10.1162/jocn\\_a\\_01075](https://doi.org/10.1162/jocn_a_01075)
- 1117 Franco, A., Malhotra, N., & Simonovits, G. (2014). Social science. Publication bias in the social  
1118 sciences: Unlocking the file drawer. *Science (New York, N.Y.)*, *345*(6203), 1502–1505.  
1119 <https://doi.org/10.1126/science.1255484>
- 1120 Garcia, J. O., Srinivasan, R., & Serences, J. T. (2013). Near-Real-Time Feature-Selective  
1121 Modulations in Human Cortex. *Current Biology*, *23*(6), 515–522.  
1122 <https://doi.org/10.1016/j.cub.2013.02.013>
- 1123 Geng, J. J. (2014). Attentional Mechanisms of Distractor Suppression. *Current Directions in*  
1124 *Psychological Science*, *23*(2), 147–153. <https://doi.org/10.1177/0963721414525780>
- 1125 Geng, J. J., Won, B.-Y., & Carlisle, N. B. (2019). Distractor Ignoring: Strategies, Learning, and  
1126 Passive Filtering. *Current Directions in Psychological Science*, *28*(6), 600–606.  
1127 <https://doi.org/10.1177/0963721419867099>
- 1128 Geweke, F., Li, S.-C., & Störmer, V. (2018). Feature-based attention is constrained to attended  
1129 locations in older adults. *Journal of Vision*, *18*(10), 306.  
1130 <https://doi.org/10.1167/18.10.306>
- 1131 Guan, M., & Vandekerckhove, J. (2016). A Bayesian approach to mitigation of publication bias.  
1132 *Psychonomic Bulletin & Review*, *23*(1), 74–86. [https://doi.org/10.3758/s13423-015-0868-](https://doi.org/10.3758/s13423-015-0868-6)  
1133 6
- 1134 Gulbinaite, R., Roozendaal, D. H. M., & VanRullen, R. (2019). Attention differentially modulates  
1135 the amplitude of resonance frequencies in the visual cortex. *NeuroImage*, *203*, 116146.  
1136 <https://doi.org/10.1016/j.neuroimage.2019.116146>
- 1137 Hasan, R., Srinivasan, R., & Grossman, E. D. (2017). Feature-based attentional tuning during  
1138 biological motion detection measured with SSVEP. *Journal of Vision*, *17*(9), 22.  
1139 <https://doi.org/10.1167/17.9.22>
- 1140 Haxby, J., Horwitz, B., Ungerleider, L., Maisog, J., Pietrini, P., & Grady, C. (1994). The  
1141 functional organization of human extrastriate cortex: A PET-rCBF study of selective  
1142 attention to faces and locations. *The Journal of Neuroscience*, *14*(11), 6336–6353.  
1143 <https://doi.org/10.1523/JNEUROSCI.14-11-06336.1994>
- 1144 Herrmann, C. S. (2001). Human EEG responses to 1?100Hz flicker: Resonance phenomena  
1145 in visual cortex and their potential correlation to cognitive phenomena. *Experimental*  
1146 *Brain Research*, *137*(3–4), 346–353. <https://doi.org/10.1007/s002210100682>

- 1147 Ipata, A. E., Gee, A. L., Gottlieb, J., Bisley, J. W., & Goldberg, M. E. (2006). LIP responses to a  
1148 popout stimulus are reduced if it is overtly ignored. *Nature Neuroscience*, *9*(8), 1071–  
1149 1076. <https://doi.org/10.1038/nn1734>
- 1150 Itthipuripat, S., Deering, S., & Serences, J. T. (2019). When Conflict Cannot be Avoided:  
1151 Relative Contributions of Early Selection and Frontal Executive Control in Mitigating  
1152 Stroop Conflict. *Cerebral Cortex*, *29*(12), 5037–5048.  
1153 <https://doi.org/10.1093/cercor/bhz042>
- 1154 Itthipuripat, S., Garcia, J. O., & Serences, J. T. (2013). Temporal dynamics of divided spatial  
1155 attention. *Journal of Neurophysiology*, *109*(9), 2364–2373.  
1156 <https://doi.org/10.1152/jn.01051.2012>
- 1157 Jiang, Y., Wu, X., & Gao, X. (2017). A category-specific top-down attentional set can affect the  
1158 neural responses outside the current focus of attention. *Neuroscience Letters*, *659*, 80–  
1159 85. <https://doi.org/10.1016/j.neulet.2017.07.029>
- 1160 Kadel, H., Feldmann-Wüstefeld, T., & Schubö, A. (2017). Selection history alters attentional  
1161 filter settings persistently and beyond top-down control: Selection history alters  
1162 attentional filter settings. *Psychophysiology*, *54*(5), 736–754.  
1163 <https://doi.org/10.1111/psyp.12830>
- 1164 Kaiser, P. K. (1988). Sensation luminance: A new name to distinguish CIE luminance from  
1165 luminance dependent on an individual's spectral sensitivity. *Vision Research*, *28*(3),  
1166 455–456. [https://doi.org/10.1016/0042-6989\(88\)90186-1](https://doi.org/10.1016/0042-6989(88)90186-1)
- 1167 Kappenman, E. S., & Luck, S. J. (2010). The effects of electrode impedance on data quality and  
1168 statistical significance in ERP recordings. *Psychophysiology*.  
1169 <https://doi.org/10.1111/j.1469-8986.2010.01009.x>
- 1170 Kashiwase, Y., Matsumiya, K., Kuriki, I., & Shioiri, S. (2012). Time Courses of Attentional  
1171 Modulation in Neural Amplification and Synchronization Measured with Steady-state  
1172 Visual-evoked Potentials. *Journal of Cognitive Neuroscience*, *24*(8), 1779–1793.  
1173 [https://doi.org/10.1162/jocn\\_a\\_00212](https://doi.org/10.1162/jocn_a_00212)
- 1174 Kastner, S., & Ungerleider, L. G. (2000). Mechanisms of Visual Attention in the Human Cortex.  
1175 *Annual Review of Neuroscience*, *23*(1), 315–341.  
1176 <https://doi.org/10.1146/annurev.neuro.23.1.315>
- 1177 Keitel, C., & Müller, M. M. (2016). Audio-visual synchrony and feature-selective attention co-  
1178 amplify early visual processing. *Experimental Brain Research*, *234*(5), 1221–1231.  
1179 <https://doi.org/10.1007/s00221-015-4392-8>
- 1180 Kim, Y. J., Grabowecky, M., Paller, K. A., Muthu, K., & Suzuki, S. (2007). Attention induces  
1181 synchronization-based response gain in steady-state visual evoked potentials. *Nature*  
1182 *Neuroscience*, *10*(1), 117–125. <https://doi.org/10.1038/nn1821>
- 1183 Kiyonaga, A., & Egner, T. (2016). Center-Surround Inhibition in Working Memory. *Current*  
1184 *Biology*, *26*(1), 64–68. <https://doi.org/10.1016/j.cub.2015.11.013>
- 1185 Kleiner, M., Brainard, D., & Pelli, D. (2007). *What's new in Psychtoolbox-3?* European  
1186 Conference on Visual Perception (ECVP), Arezzo, Italy.  
1187 <https://pdfs.semanticscholar.org/04d4/7572cec08b7a582a9366e5ac61dcfd633f2a.pdf>
- 1188 Kravitz, D., & Mitroff, S. (2017). Estimates of a priori power and false discovery rates induced by  
1189 post-hoc changes from thousands of independent replications. *Journal of Vision*, *17*(10),  
1190 223. <https://doi.org/10.1167/17.10.223>
- 1191 Lamy, D. F., Antebi, C., Aviani, N., & Carmel, T. (2008). Priming of Pop-out provides reliable  
1192 measures of target activation and distractor inhibition in selective attention. *Vision*  
1193 *Research*, *48*(1), 30–41. <https://doi.org/10.1016/j.visres.2007.10.009>
- 1194 Lamy, D. F., & Kristjansson, A. (2013). Is goal-directed attentional guidance just intertrial  
1195 priming? A review. *Journal of Vision*, *13*(3), 14–14. <https://doi.org/10.1167/13.3.14>

- 1196 Lithari, C., Sánchez-García, C., Ruhnau, P., & Weisz, N. (2016). Large-scale network-level  
1197 processes during entrainment. *Brain Research*, *1635*, 143–152.  
1198 <https://doi.org/10.1016/j.brainres.2016.01.043>
- 1199 Luck, S. J. (2005). *An Introduction to the Event-Related Potential Technique* (1st ed.). MIT  
1200 Press.
- 1201 Martínez-Trujillo, J. C., & Treue, S. (2004). Feature-Based Attention Increases the Selectivity of  
1202 Population Responses in Primate Visual Cortex. *Current Biology*, *14*(9), 744–751.  
1203 <https://doi.org/10.1016/j.cub.2004.04.028>
- 1204 Martinovic, J., & Andersen, S. K. (2018). Cortical summation and attentional modulation of  
1205 combined chromatic and luminance signals. *NeuroImage*, *176*, 390–403.  
1206 <https://doi.org/10.1016/j.neuroimage.2018.04.066>
- 1207 Martinovic, J., Wuerger, S. M., Hillyard, S. A., Müller, M. M., & Andersen, S. K. (2018). Neural  
1208 mechanisms of divided feature-selective attention to colour. *NeuroImage*, *181*, 670–682.  
1209 <https://doi.org/10.1016/j.neuroimage.2018.07.033>
- 1210 Mishkin, M., & Ungerleider, L. G. (1982). Contribution of striate inputs to the visuospatial  
1211 functions of parieto-preoccipital cortex in monkeys. *Behavioural Brain Research*, *6*(1),  
1212 57–77. [https://doi.org/10.1016/0166-4328\(82\)90081-X](https://doi.org/10.1016/0166-4328(82)90081-X)
- 1213 Moher, J., & Egeth, H. E. (2012). The ignoring paradox: Cueing distractor features leads first to  
1214 selection, then to inhibition of to-be-ignored items. *Attention, Perception, &*  
1215 *Psychophysics*, *74*(8), 1590–1605. <https://doi.org/10.3758/s13414-012-0358-0>
- 1216 Moher, J., Lakshmanan, B. M., Egeth, H. E., & Ewen, J. B. (2014). Inhibition Drives Early  
1217 Feature-Based Attention. *Psychological Science*, *25*(2), 315–324.  
1218 <https://doi.org/10.1177/0956797613511257>
- 1219 Morgan, S. T., Hansen, J. C., & Hillyard, S. A. (1996). Selective attention to stimulus location  
1220 modulates the steady-state visual evoked potential. *Proceedings of the National*  
1221 *Academy of Sciences of the United States of America*, *93*(10), 4770–4774.
- 1222 Müller, M. M., Andersen, S., Trujillo, N. J., Valdes-Sosa, P., Malinowski, P., & Hillyard, S. A.  
1223 (2006). Feature-selective attention enhances color signals in early visual areas of the  
1224 human brain. *Proceedings of the National Academy of Sciences*, *103*(38), 14250–14254.  
1225 <https://doi.org/10.1073/pnas.0606668103>
- 1226 Müller, M. M., Gundlach, C., Forschack, N., & Brummerloh, B. (2018). It takes two to tango:  
1227 Suppression of task-irrelevant features requires (spatial) competition. *NeuroImage*, *178*,  
1228 485–492. <https://doi.org/10.1016/j.neuroimage.2018.05.073>
- 1229 Müller, M. M., & Hillyard, S. (2000). Concurrent recording of steady-state and transient event-  
1230 related potentials as indices of visual-spatial selective attention. *Clinical*  
1231 *Neurophysiology*, *111*(9), 1544–1552. [https://doi.org/10.1016/S1388-2457\(00\)00371-0](https://doi.org/10.1016/S1388-2457(00)00371-0)
- 1232 Müller, M. M., Picton, T. W., Valdes-Sosa, P., Riera, J., Teder-Sälejärvi, W. A., & Hillyard, S. A.  
1233 (1998). Effects of spatial selective attention on the steady-state visual evoked potential  
1234 in the 20–28 Hz range. *Cognitive Brain Research*, *6*(4), 249–261.  
1235 [https://doi.org/10.1016/S0926-6410\(97\)00036-0](https://doi.org/10.1016/S0926-6410(97)00036-0)
- 1236 Müller, M. M., Teder-Sälejärvi, W., & Hillyard, S. A. (1998). The time course of cortical  
1237 facilitation during cued shifts of spatial attention. *Nature Neuroscience*, *1*(7), 631–634.  
1238 <https://doi.org/10.1038/2865>
- 1239 Norcia, A. M., Appelbaum, L. G., Ales, J. M., Cottareau, B. R., & Rossion, B. (2015). The  
1240 steady-state visual evoked potential in vision research: A review. *Journal of Vision*,  
1241 *15*(6), 4. <https://doi.org/10.1167/15.6.4>
- 1242 Nunez, M. D., Srinivasan, R., & Vandekerckhove, J. (2015). Individual differences in attention  
1243 influence perceptual decision making. *Frontiers in Psychology*, *8*, 18.  
1244 <https://doi.org/10.3389/fpsyg.2015.00018>



- 1245 Owen, A. M., Milner, B., Petrides, M., & Evans, A. C. (1996). Memory for object features versus  
1246 memory for object location: A positron-emission tomography study of encoding and  
1247 retrieval processes. *Proceedings of the National Academy of Sciences*, *93*(17), 9212–  
1248 9217. <https://doi.org/10.1073/pnas.93.17.9212>
- 1249 Painter, D. R., Dux, P. E., & Mattingley, J. B. (2015). Causal involvement of visual area MT in  
1250 global feature-based enhancement but not contingent attentional capture. *NeuroImage*,  
1251 *118*, 90–102. <https://doi.org/10.1016/j.neuroimage.2015.06.019>
- 1252 Painter, D. R., Dux, P. E., Travis, S. L., & Mattingley, J. B. (2014). Neural Responses to Target  
1253 Features outside a Search Array Are Enhanced during Conjunction but Not Unique-  
1254 Feature Search. *Journal of Neuroscience*, *34*(9), 3390–3401.  
1255 <https://doi.org/10.1523/JNEUROSCI.3630-13.2014>
- 1256 Pei, F., Pettet, M. W., & Norcia, A. M. (2002). Neural correlates of object-based attention.  
1257 *Journal of Vision*, *2*(9), 1. <https://doi.org/10.1167/2.9.1>
- 1258 Pelli, D. G. (1997). The VideoToolbox software for visual psychophysics: Transforming numbers  
1259 into movies. *Spatial Vision*, *10*(4), 437–442. <https://doi.org/10.1163/156856897X00366>
- 1260 Quigley, C., Andersen, S. K., Schulze, L., Grunwald, M., & Müller, M. M. (2010). Feature-  
1261 selective attention: Evidence for a decline in old age. *Neuroscience Letters*, *474*(1), 5–8.  
1262 <https://doi.org/10.1016/j.neulet.2010.02.053>
- 1263 Quigley, C., & Müller, M. M. (2014). Feature-Selective Attention in Healthy Old Age: A Selective  
1264 Decline in Selective Attention? *Journal of Neuroscience*, *34*(7), 2471–2476.  
1265 <https://doi.org/10.1523/JNEUROSCI.2718-13.2014>
- 1266 Reeder, R. R., Olivers, C. N. L., & Pollmann, S. (2017). Cortical evidence for negative search  
1267 templates. *Visual Cognition*, *25*(1–3), 278–290.  
1268 <https://doi.org/10.1080/13506285.2017.1339755>
- 1269 Regan, D. (1977). Steady-state evoked potentials. *Journal of the Optical Society of America*,  
1270 *67*(11), 1475. <https://doi.org/10.1364/JOSA.67.001475>
- 1271 Rosenthal, R. (1979). The file drawer problem and tolerance for null results. *Psychological*  
1272 *Bulletin*, *86*(3), 638–641. <https://doi.org/10.1037/0033-2909.86.3.638>
- 1273 Rungratsameetaweemana, N., Itthipuripat, S., Salazar, A., & Serences, J. T. (2018).  
1274 Expectations Do Not Alter Early Sensory Processing during Perceptual Decision-Making.  
1275 *The Journal of Neuroscience*, *38*(24), 5632–5648.  
1276 <https://doi.org/10.1523/JNEUROSCI.3638-17.2018>
- 1277 Sàenz, M., Buracas, G. T., & Boynton, G. M. (2002). Global effects of feature-based attention in  
1278 human visual cortex. *Nature Neuroscience*, *5*(7), 631–632. <https://doi.org/10.1038/nn876>
- 1279 Sàenz, M., Buraças, G. T., & Boynton, G. M. (2003). Global feature-based attention for motion  
1280 and color. *Vision Research*, *43*(6), 629–637. [https://doi.org/10.1016/S0042-6989\(02\)00595-3](https://doi.org/10.1016/S0042-6989(02)00595-3)
- 1281
- 1282 Sawaki, R., & Luck, S. J. (2010). Capture versus suppression of attention by salient singletons:  
1283 Electrophysiological evidence for an automatic attend-to-me signal. *Attention*,  
1284 *Perception, & Psychophysics*, *72*(6), 1455–1470. <https://doi.org/10.3758/APP.72.6.1455>
- 1285 Srinivasan, R., Bibi, F. A., & Nunez, P. L. (2006). Steady-State Visual Evoked Potentials:  
1286 Distributed Local Sources and Wave-Like Dynamics Are Sensitive to Flicker Frequency.  
1287 *Brain Topography*, *18*(3), 167–187. <https://doi.org/10.1007/s10548-006-0267-4>
- 1288 Steinhauser, M., & Andersen, S. K. (2019). Rapid adaptive adjustments of selective attention  
1289 following errors revealed by the time course of steady-state visual evoked potentials.  
1290 *NeuroImage*, *186*, 83–92. <https://doi.org/10.1016/j.neuroimage.2018.10.059>
- 1291 Sterling, T. D. (1959). Publication Decisions and their Possible Effects on Inferences Drawn  
1292 from Tests of Significance—Or Vice Versa. *Journal of the American Statistical*  
1293 *Association*, *54*(285), 30–34. <https://doi.org/10.1080/01621459.1959.10501497>

- 1294 Sterling, T. D., Rosenbaum, W. L., & Weinkam, J. J. (1995). Publication Decisions Revisited:  
1295 The Effect of the Outcome of Statistical Tests on the Decision to Publish and Vice Versa.  
1296 *The American Statistician*, 49(1), 108–112.  
1297 <https://doi.org/10.1080/00031305.1995.10476125>
- 1298 Stilwell, B. T., & Vecera, S. P. (2019). Cued distractor rejection disrupts learned distractor  
1299 rejection. *Visual Cognition*, 27(3–4), 327–342.  
1300 <https://doi.org/10.1080/13506285.2018.1564808>
- 1301 Störmer, V. S., & Alvarez, G. A. (2014). Feature-Based Attention Elicits Surround Suppression  
1302 in Feature Space. *Current Biology*, 24(17), 1985–1988.  
1303 <https://doi.org/10.1016/j.cub.2014.07.030>
- 1304 Tallon-Baudry, C., Bertrand, O., Delpuech, C., & Pernier, J. (1996). Stimulus Specificity of  
1305 Phase-Locked and Non-Phase-Locked 40 Hz Visual Responses in Human. *The Journal*  
1306 *of Neuroscience*, 16(13), 4240–4249. [https://doi.org/10.1523/JNEUROSCI.16-13-](https://doi.org/10.1523/JNEUROSCI.16-13-04240.1996)  
1307 [04240.1996](https://doi.org/10.1523/JNEUROSCI.16-13-04240.1996)
- 1308 Talsma, D., Doty, T. J., Strowd, R., & Woldorff, M. G. (2006). Attentional capacity for processing  
1309 concurrent stimuli is larger across sensory modalities than within a modality.  
1310 *Psychophysiology*, 43(6), 541–549. <https://doi.org/10.1111/j.1469-8986.2006.00452.x>
- 1311 Theeuwes, J. (2013). Feature-based attention: It is all bottom-up priming. *Philosophical*  
1312 *Transactions of the Royal Society B: Biological Sciences*, 368(1628), 20130055.  
1313 <https://doi.org/10.1098/rstb.2013.0055>
- 1314 Thigpen, N. N., Kappenman, E. S., & Keil, A. (2017). Assessing the internal consistency of the  
1315 event-related potential: An example analysis: Assessing internal consistency of the ERP.  
1316 *Psychophysiology*, 54(1), 123–138. <https://doi.org/10.1111/psyp.12629>
- 1317 Thigpen, N. N., Petro, N. M., Oswald, J., Oberauer, K., & Keil, A. (2019). Selection of Visual  
1318 Objects in Perception and Working Memory One at a Time. *Psychological Science*,  
1319 30(9), 1259–1272. <https://doi.org/10.1177/0956797619854067>
- 1320 Toffanin, P., de Jong, R., Johnson, A., & Martens, S. (2009). Using frequency tagging to  
1321 quantify attentional deployment in a visual divided attention task. *International Journal of*  
1322 *Psychophysiology*, 72(3), 289–298. <https://doi.org/10.1016/j.ijpsycho.2009.01.006>
- 1323 Van Moorselaar, D., & Slagter, H. A. (2020). Inhibition in selective attention. *Annals of the New*  
1324 *York Academy of Sciences*, 1464(1), 204–221.
- 1325 Vatterott, D. B., & Vecera, S. P. (2012). Experience-dependent attentional tuning of distractor  
1326 rejection. *Psychonomic Bulletin & Review*, 19(5), 871–878.  
1327 <https://doi.org/10.3758/s13423-012-0280-4>
- 1328 Verghese, P., Kim, Y.-J., & Wade, A. R. (2012). Attention Selects Informative Neural  
1329 Populations in Human V1. *Journal of Neuroscience*, 32(46), 16379–16390.  
1330 <https://doi.org/10.1523/JNEUROSCI.1174-12.2012>
- 1331 Vialatte, F.-B., Maurice, M., Dauwels, J., & Cichocki, A. (2010). Steady-state visually evoked  
1332 potentials: Focus on essential paradigms and future perspectives. *Progress in*  
1333 *Neurobiology*, 90(4), 418–438. <https://doi.org/10.1016/j.pneurobio.2009.11.005>
- 1334 Vissers, M. E., Gulbinaite, R., van den Bos, T., & Slagter, H. A. (2017). Protecting visual short-  
1335 term memory during maintenance: Attentional modulation of target and distractor  
1336 representations. *Scientific Reports*, 7(1), 4061. [https://doi.org/10.1038/s41598-017-](https://doi.org/10.1038/s41598-017-03995-0)  
1337 [03995-0](https://doi.org/10.1038/s41598-017-03995-0)
- 1338 Wang, B., & Theeuwes, J. (2018a). Statistical regularities modulate attentional capture. *Journal*  
1339 *of Experimental Psychology: Human Perception and Performance*, 44(1), 13–17.  
1340 <https://doi.org/10.1037/xhp0000472>

- 1341 Wang, B., & Theeuwes, J. (2018b). How to inhibit a distractor location? Statistical learning  
1342 versus active, top-down suppression. *Attention, Perception, & Psychophysics*.  
1343 <https://doi.org/10.3758/s13414-018-1493-z>
- 1344 Wang, J., Clementz, B. A., & Keil, A. (2007). The neural correlates of feature-based selective  
1345 attention when viewing spatially and temporally overlapping images. *Neuropsychologia*,  
1346 *45*(7), 1393–1399. <https://doi.org/10.1016/j.neuropsychologia.2006.10.019>
- 1347 Wang, Y., Miller, J., & Liu, T. (2015). Suppression effects in feature-based attention. *Journal of*  
1348 *Vision*, *15*(5), 15. <https://doi.org/10.1167/15.5.15>
- 1349 White, A. L., & Carrasco, M. (2011). Feature-based attention involuntarily and simultaneously  
1350 improves visual performance across locations. *Journal of Vision*, *11*(6), 15–15.  
1351 <https://doi.org/10.1167/11.6.15>
- 1352 Williams, R. S., Pratt, J., & Ferber, S. (2020). Directed avoidance and its effect on visual  
1353 working memory. *Cognition*, *201*, 104277.  
1354 <https://doi.org/10.1016/j.cognition.2020.104277>
- 1355 Won, B.-Y., & Geng, J. J. (2020). Passive exposure attenuates distraction during visual search.  
1356 *Journal of Experimental Psychology: General*. <https://doi.org/10.1037/xge0000760>
- 1357 Won, D.-O., Hwang, H.-J., Dähne, S., Müller, K.-R., & Lee, S.-W. (2016). Effect of higher  
1358 frequency on the classification of steady-state visual evoked potentials. *Journal of*  
1359 *Neural Engineering*, *13*(1), 016014. <https://doi.org/10.1088/1741-2560/13/1/016014>
- 1360 Zar, J. H. (2010). *Biostatistical Analysis* (5th ed.). Prentice-Hall.
- 1361 Zhang, D., Maye, A., Gao, X., Hong, B., Engel, A. K., & Gao, S. (2010). An independent brain–  
1362 computer interface using covert non-spatial visual selective attention. *Journal of Neural*  
1363 *Engineering*, *7*(1), 016010. <https://doi.org/10.1088/1741-2560/7/1/016010>
- 1364 Zhang, W., & Luck, S. J. (2009). Feature-based attention modulates feedforward visual  
1365 processing. *Nature Neuroscience*, *12*(1), 24–25. <https://doi.org/10.1038/nn.2223>
- 1366 Zhang, Z., Gaspelin, N., & Carlisle, N. B. (2020). Probing early attention following negative and  
1367 positive templates. *Attention, Perception, & Psychophysics*, *82*(3), 1166–1175.  
1368 <https://doi.org/10.3758/s13414-019-01864-8>
- 1369 Zhu, D., Bieger, J., Garcia Molina, G., & Aarts, R. M. (2010). A Survey of Stimulation Methods  
1370 Used in SSVEP-Based BCIs. *Computational Intelligence and Neuroscience*, *2010*, 1–12.  
1371 <https://doi.org/10.1155/2010/702357>

1372  
1373  
1374  
1375  
1376  
1377  
1378  
1379  
1380  
1381  
1382  
1383  
1384  
1385

1386 **Appendix A. Example frames during the stimulus presentation.** Eight example  
1387 frames (1-8) from the stimulus presentation period illustrate how the flicker was  
1388 achieved (refresh rate was 120 Hz, so each frame was ~8.33 ms). In this example, the  
1389 attended color is yellow, and the attended frequency is 24 Hz (3 frames on, 2 frames  
1390 off). Blue is the unattended color (30 Hz; 2 frames on, 2 frames off). The white dot in the  
1391 upper left-hand corner was used to record the attended frequency flicker using a  
1392 photodiode (this corner of the screen was covered with thick, opaque black electrical  
1393 tape so that it was not visible to the participants).

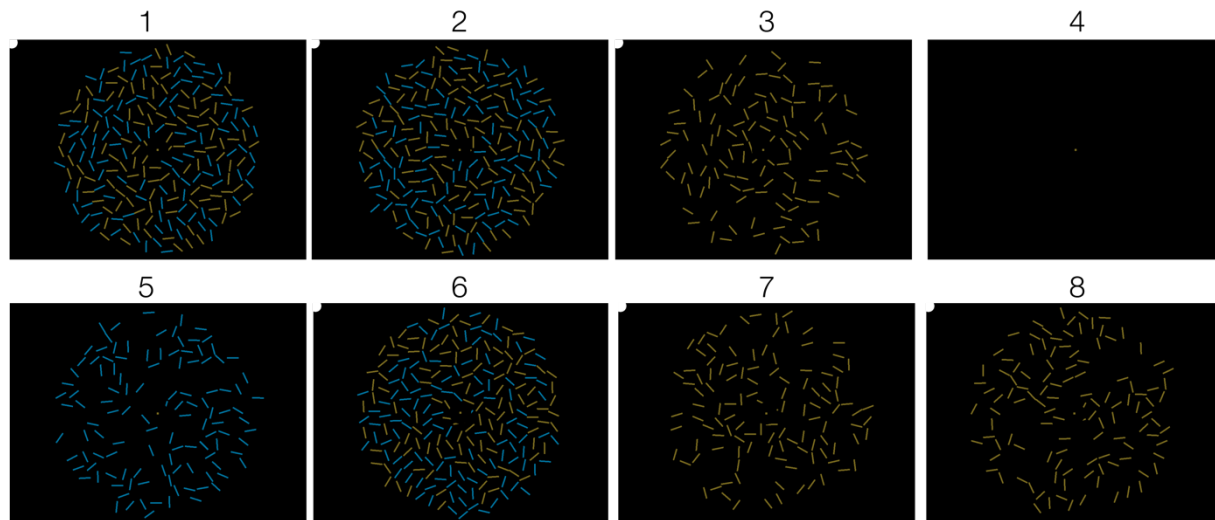

1394  
1395  
1396  
1397  
1398  
1399  
1400  
1401

**Appendix B. Accuracy for target-present trials as a function of the time between Cue Onset and the Target Onset.** For short cue-target intervals ( $\leq 275$  ms), participants were more accurate for attend cues than ignore cues. This pattern suggests that participants were more quickly able to utilize the attend cue than the ignore cue. Shaded error bars indicate  $\pm 1$  SEM. Small gray dots indicate  $p < .05$  (uncorrected), large dots indicate  $p < .001$  (uncorrected).

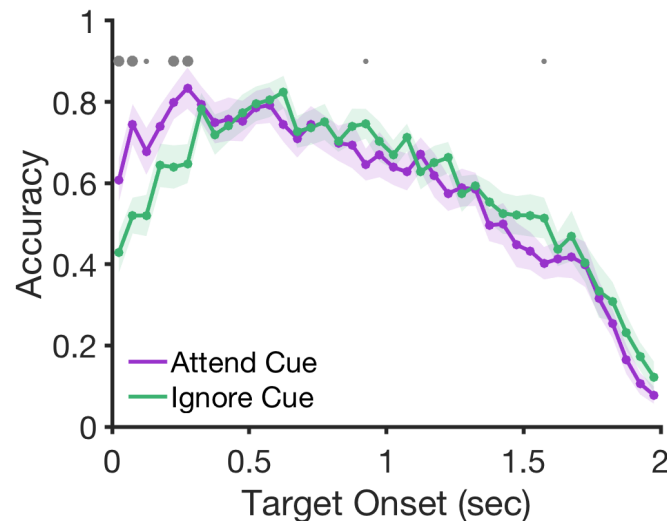

1402  
1403

1404 **Appendix C. Power and SNR for each frequency.** (A) Power for each frequency  
1405 using the Gaussian wavelet filter analysis. (B) SNR for each frequency, calculated as  
1406 the power at the frequency (e.g., 24 Hz) divided by the power at the average of the 2  
1407 neighboring 1-Hz frequencies on either side (e.g., average of 22, 23, 25, and 26 Hz).  
1408 The theoretical chance level for SNR is 1 (dotted line), but because SNR is calculated  
1409 with neighboring frequencies, frequencies that are adjacent to a significant “peak” may  
1410 have values below 1. (C) Cohen’s d for the comparison between SNR at each of the two  
1411 target SSVEP frequencies (24 Hz, 30 Hz) relative to other baselined frequencies (3-33  
1412 Hz excluding frequencies within +/- 2 Hz of the target SSVEP frequencies).

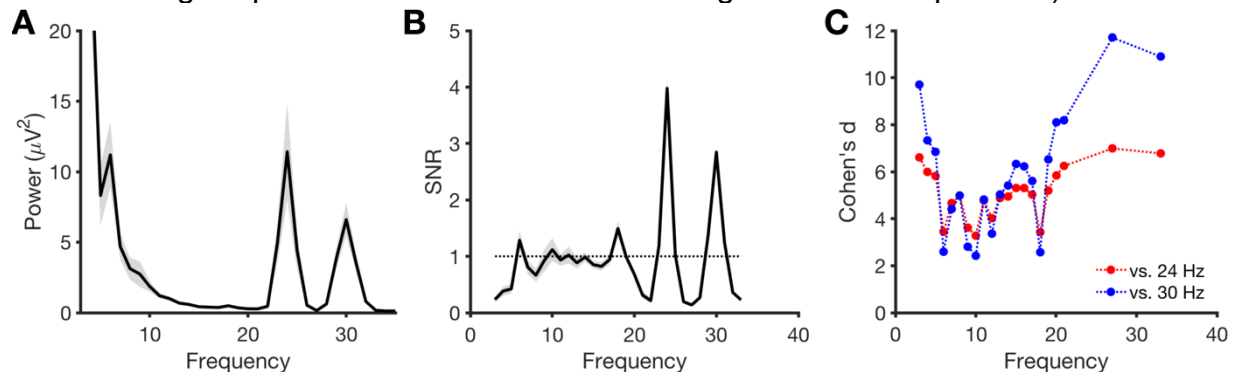

1413  
1414

1415 **Appendix D. Time-course of SNR for each frequency.** The stimulus began flickering  
1416 at -1,333 ms, and the cue indicating which color to attend appeared at 0 ms. Red lines  
1417 show when 24 Hz was the attended frequency; Blue lines show when 30 Hz was the  
1418 attended frequency. Solid lines show data from the “attend cue” condition; Dotted lines  
1419 show the “ignore cue” condition.

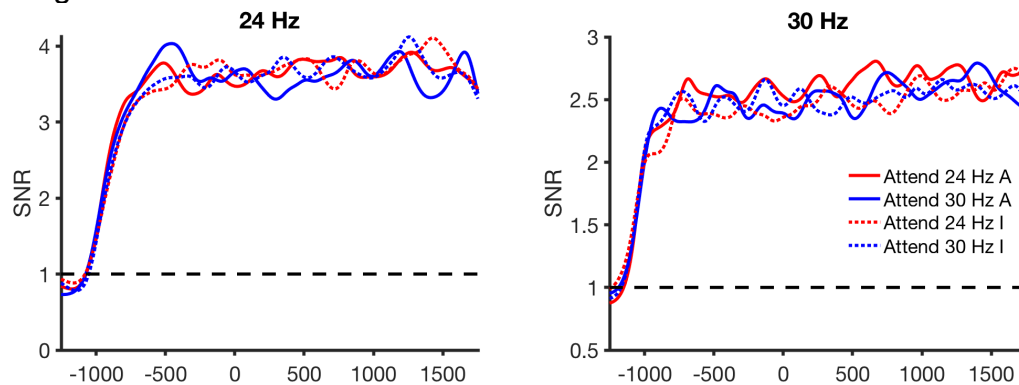

1420  
1421  
1422  
1423  
1424  
1425  
1426  
1427  
1428  
1429  
1430

1431 **Appendix E. Frequency spectra separately for each target/distractor presence**  
1432 **condition.** Trials were counterbalanced to have a 50% chance of having a target event  
1433 (T1) and to have 50% chance of including a distractor event (D1). Thus, 25% of trials  
1434 had neither a target nor distractor (T0D0), 25% of trials had a target only (T1D0), 25%  
1435 of trials had a distractor only (T0D1), and 25% of trials had both a target and a distractor  
1436 (T1D1). Frequency spectra for each sub-condition are shown (Rows: Attend Cue or  
1437 Ignore Cue, Columns: Each combination of target and distractor present/absent).

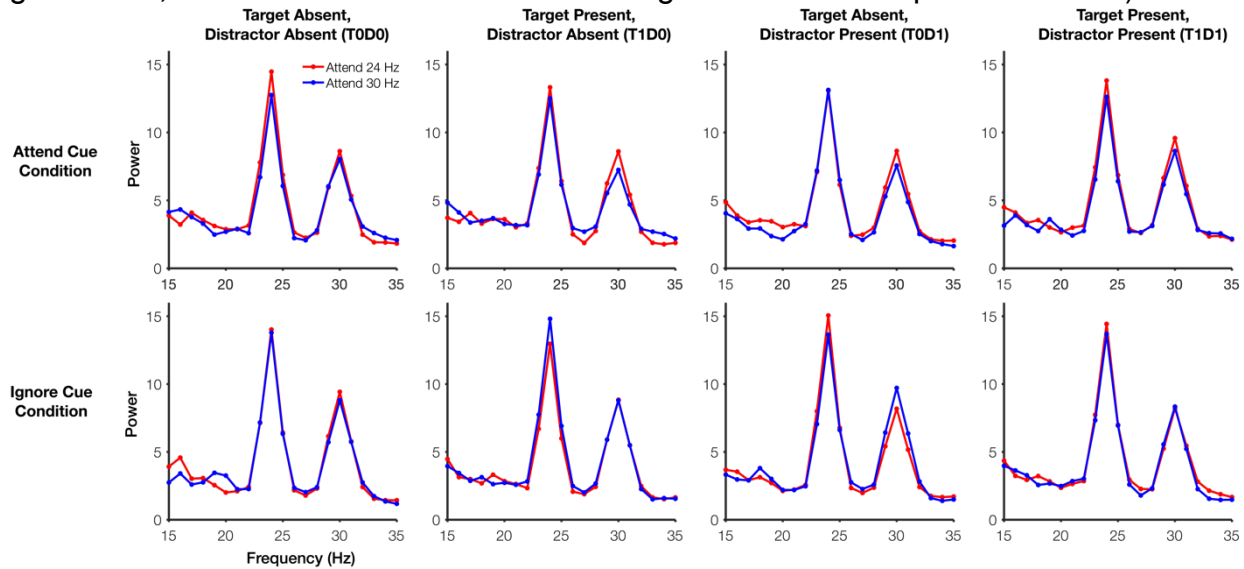

1438  
1439  
1440  
1441  
1442  
1443  
1444  
1445  
1446  
1447  
1448  
1449  
1450  
1451  
1452  
1453  
1454  
1455  
1456  
1457  
1458  
1459  
1460  
1461

1462 **Appendix F. Signal to noise ratio (SNR) values separately for each**  
1463 **target/distractor presence condition.** Trials were counterbalanced have a 50%  
1464 chance of having a target event (T1) and to have 50% chance of including a distractor  
1465 event (D1). Thus, 25% of trials had neither a target nor distractor (T0D0), 25% of trials  
1466 had a target only (T1D0), 25% of trials had a distractor only (T0D1), and 25% of trials  
1467 had both a target and a distractor (T1D1). Frequency spectra for each sub-condition are  
1468 shown (Rows: Attend Cue or Ignore Cue, Columns: Each combination of target and  
1469 distractor present/absent). The bottom row of asterisks shows post-hoc, uncorrected  
1470 significance for overall SSVEP signal compared to a null value of 1. The SSVEP signal  
1471 was overall highly significant (\*\*\*,  $p < .001$ ). The top row of asterisks shows post-hoc,  
1472 uncorrected significance for the comparison between the two adjacent bars (n.s.  $p >$   
1473  $.10$ ,  $\sim p < .10$ , \*  $p < .05$ ). Note, no conditions showed an attention effect (attended  
1474 frequency  $>$  ignored frequency); the only significant, uncorrected post-hoc comparison  
1475 was in the wrong direction (ignored  $>$  attended).

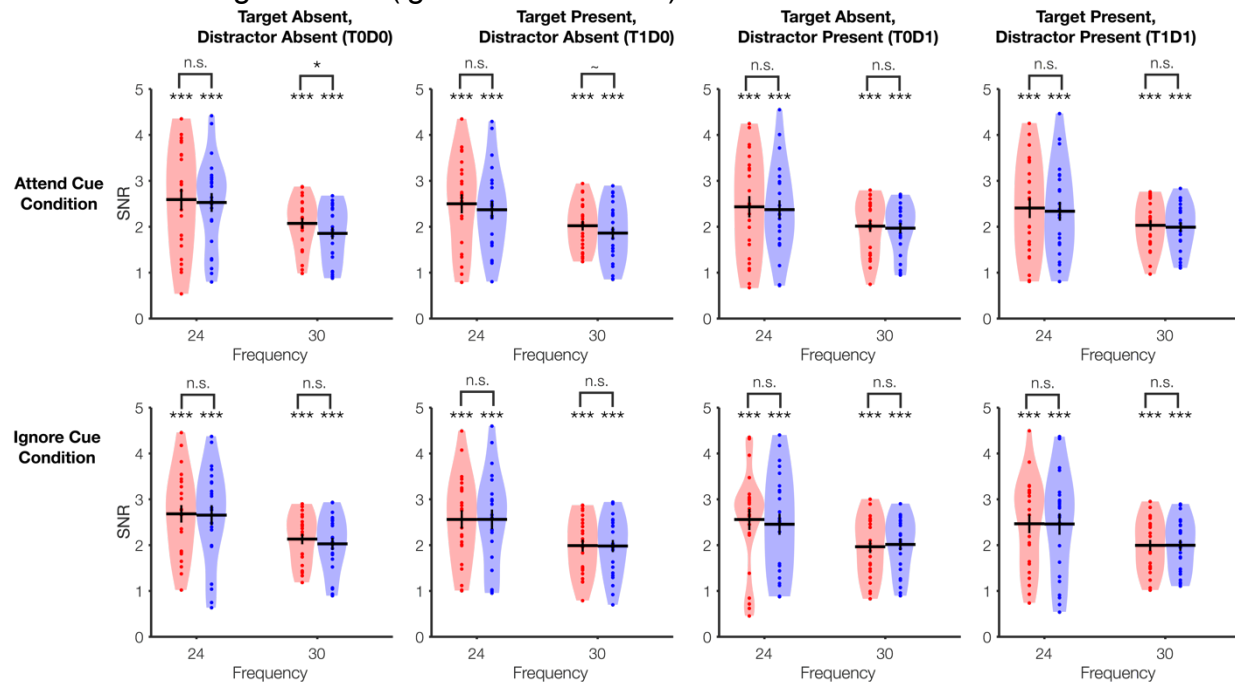

1476  
1477  
1478  
1479

1480 **Appendix G. Power by frequency separately for each color distance condition.**  
1481 Target and distractor colors were randomly assigned on each trial from a pool of 5  
1482 possible colors. Thus, the target and distractor colors could be either 72 degrees (Color  
1483 1) or 144 degrees (Color 2) apart on a color wheel. We found no evidence of an  
1484 attention effect in either color distance condition.

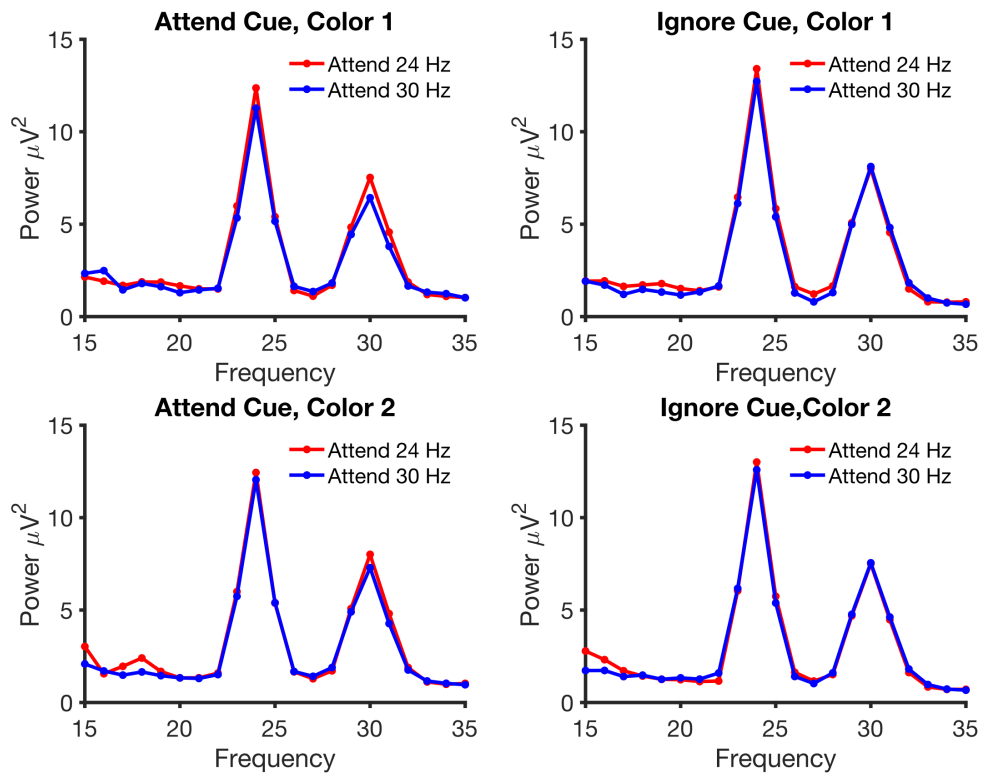

1485



**Appendix H. An additional analysis variant for the main SNR measure: skipping the first bin for computing SNR.** Rather than using the pre-registered frequencies of +/- 1 and +/- 2 Hz for computing SNR, we instead skipped the first 1 Hz bin. Since +/- 1 Hz had greater than baseline power, we may have attenuated our ability to observe SSVEP-related differences by including this bin in our SNR subtraction. For this analysis variant, we instead calculated SNR as the peak frequency minus the average of all frequencies +/- 2 and +/- 3 Hz from the peak (e.g., to compute SNR for 24 Hz, we subtracted the mean power at 21, 22, 26, and 27 Hz). Although overall SNR was much higher across all conditions using this metric, the pattern across experimental conditions was unchanged (i.e., we found no significant attention effects).

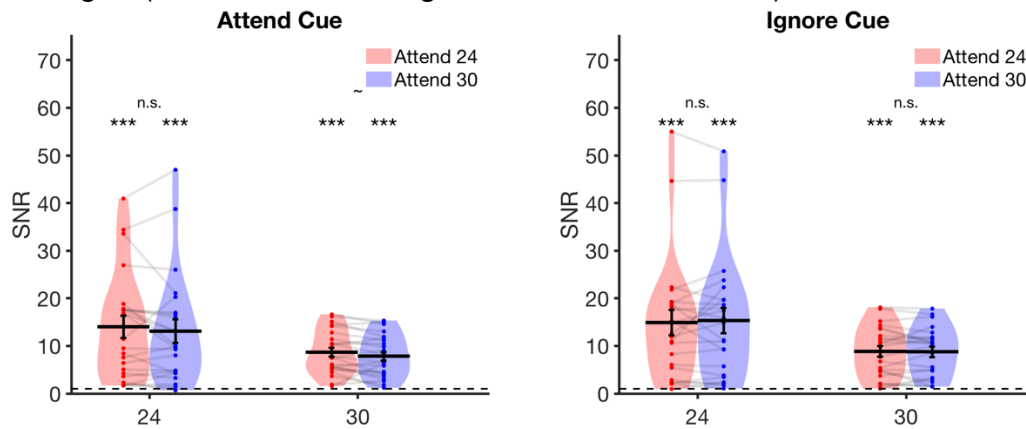

1486 **Appendix I. FFT analysis with a wider x-axis to show both the fundamental and**  
1487 **second harmonic frequencies.** (Left) FFT for the 'attend cue' condition. (Right) FFT  
1488 for the 'ignore cue' condition. X-axis values are frequency (Hz); Y-axis values are  
1489 amplitude (microvolts).

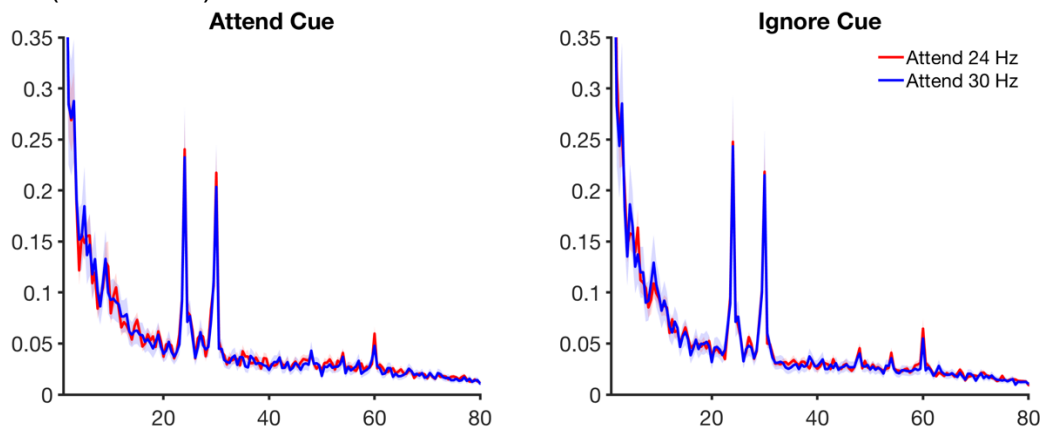

1490  
1491  
1492  
1493  
1494  
1495  
1496

1497 **Appendix J. Violin plot of the second harmonic frequencies 48 Hz and 60 Hz from**  
1498 **the FFT analysis.** (Left) Violin plot of SNR for the second harmonic frequencies in the  
1499 'attend cue' condition; SNR for both harmonics was greater than 1, but there were no  
1500 attention effects. (B) Violin plot of SNR for the second harmonic frequencies in the  
1501 'ignore cue' condition; SNR for both harmonics was greater than 1, but there were no  
1502 attention effects.

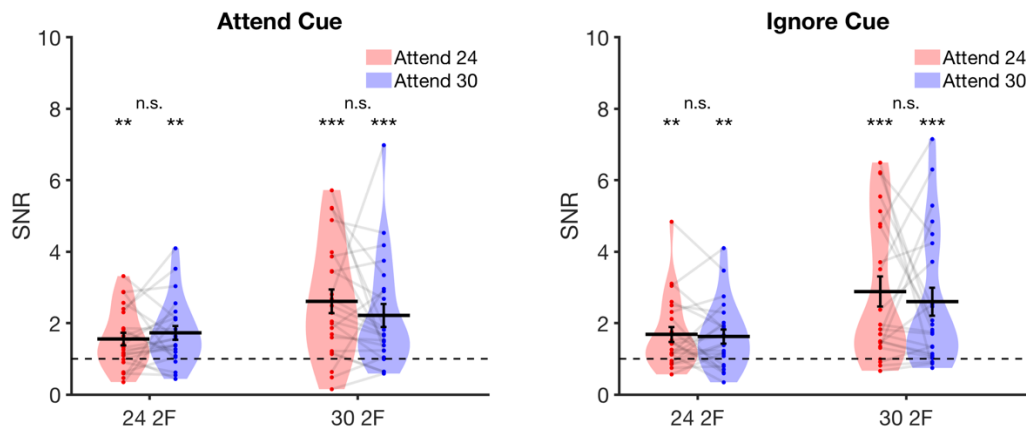

1503  
1504  
1505  
1506  
1507  
1508  
1509  
1510  
1511  
1512  
1513  
1514  
1515  
1516  
1517  
1518  
1519  
1520  
1521  
1522  
1523  
1524  
1525  
1526  
1527  
1528  
1529  
1530

1531 **Appendix K. Rhythmic Entrainment Source Separation (RESS) analysis likewise**  
1532 **shows null attention effects.** Following code associated with [1], we performed  
1533 rhythmic entrainment source separation (RESS) on our data to ensure that our a priori  
1534 choice of electrodes did not impede our ability to find an attention effect. We decided to  
1535 stick very closely to the default settings for RESS code developed by others in order to  
1536 take some ‘researcher degrees of freedom’ out of the equation. We obtained a highly  
1537 consistent pattern of results despite using a data-driven, single-trial approach that  
1538 differs substantially from our pre-registered trial-averaged approach. We also note that  
1539 the SNR values from the RESS approach are lower than the trial-averaged FFT we  
1540 present in the main analysis, but that RESS does still provide an SNR advantage when  
1541 compared to a single-trial FFT approach, as in [1]. We first calculated the spatial filters

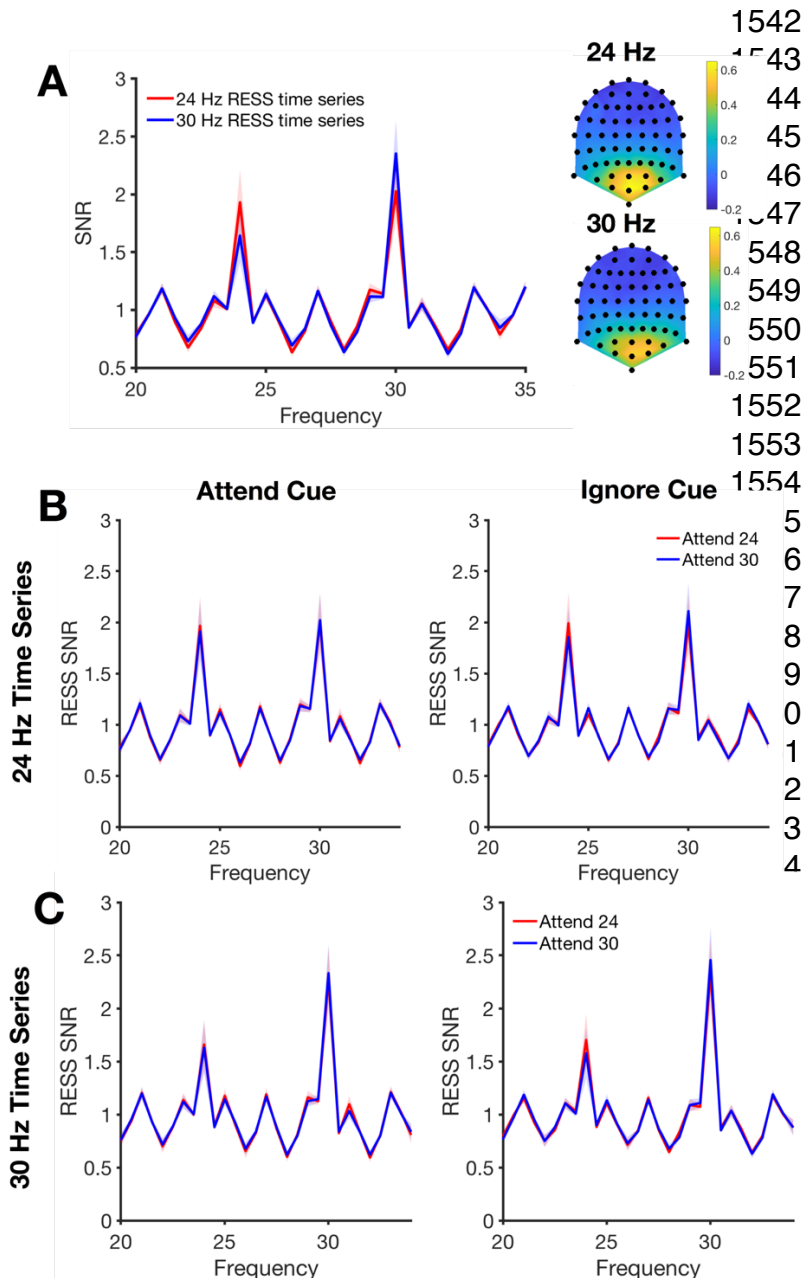

1575 **Appendix L. Violin plots of values obtained from the Rhythmic Entrainment**  
1576 **Source Separation (RESS) analysis.** We found no effect of attention on RESS values  
1577 in either the Attend Cue condition (left panel) or the Ignore Cue condition (right panel).

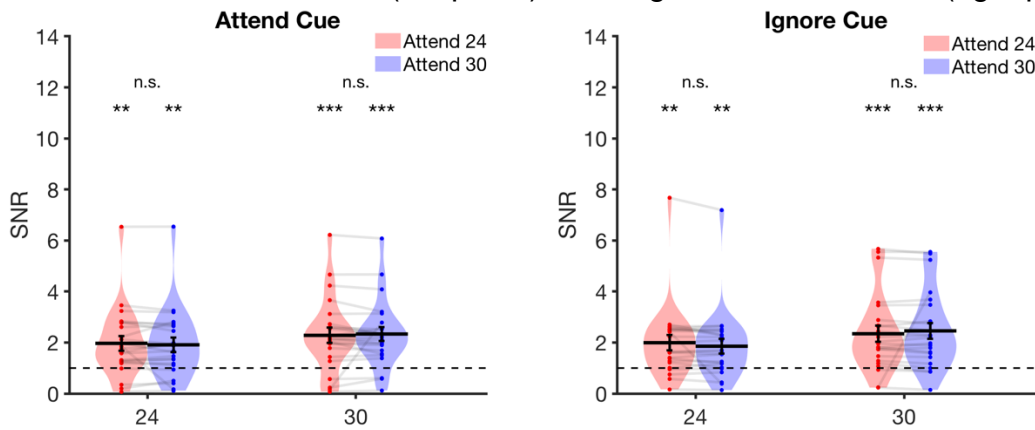

1578  
1579

1580 **Appendix M. Violin plots of SNR values for each frequency, calculated from an**  
1581 **FFT analysis on accurate trials only.** Performing an FFT analysis on accurate trials  
1582 only likewise yields null attention effects both in the attend cue condition (left panel) and  
1583 the ignore cue condition (right panel).

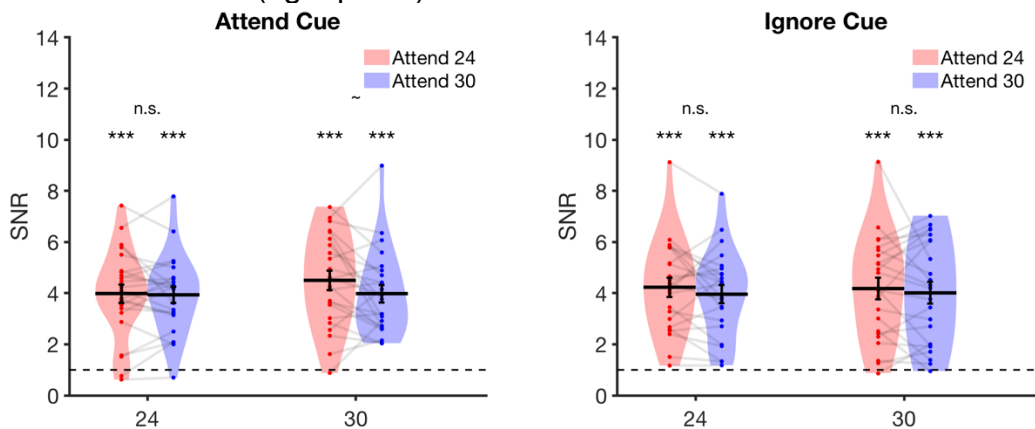

1584  
1585  
1586  
1587  
1588  
1589  
1590  
1591  
1592  
1593  
1594  
1595  
1596  
1597  
1598

1599 **Appendix N. Results of the phase-locking index (PLI) analysis.** We performed an  
1600 FFT on single trials rather than on condition-averaged waveforms (time window: 333 ms  
1601 – 2000 ms), and we extracted single-trial phase values (*angle.m*). We calculated a  
1602 phase-locking index by computing mean-resultant vector length on histograms of single-  
1603 trial phase values (separate histograms for each condition, electrode, and frequency).  
1604 Mean-resultant vector length ranges from 0 (fully random values) to 1 (perfectly identical  
1605 values), for reference, see: Zar (2010). **(A)** Phase locking index (PLI) as indexed by  
1606 mean-resultant vector length, averaged across electrodes O1, O2, and Oz. Replicating  
1607 prior work, we found robust PLI values at the two SSVEP frequencies (24 and 30 Hz).  
1608 **(B)** However, we found no evidence that PLI values were modulated by attention in the  
1609 expected direction.

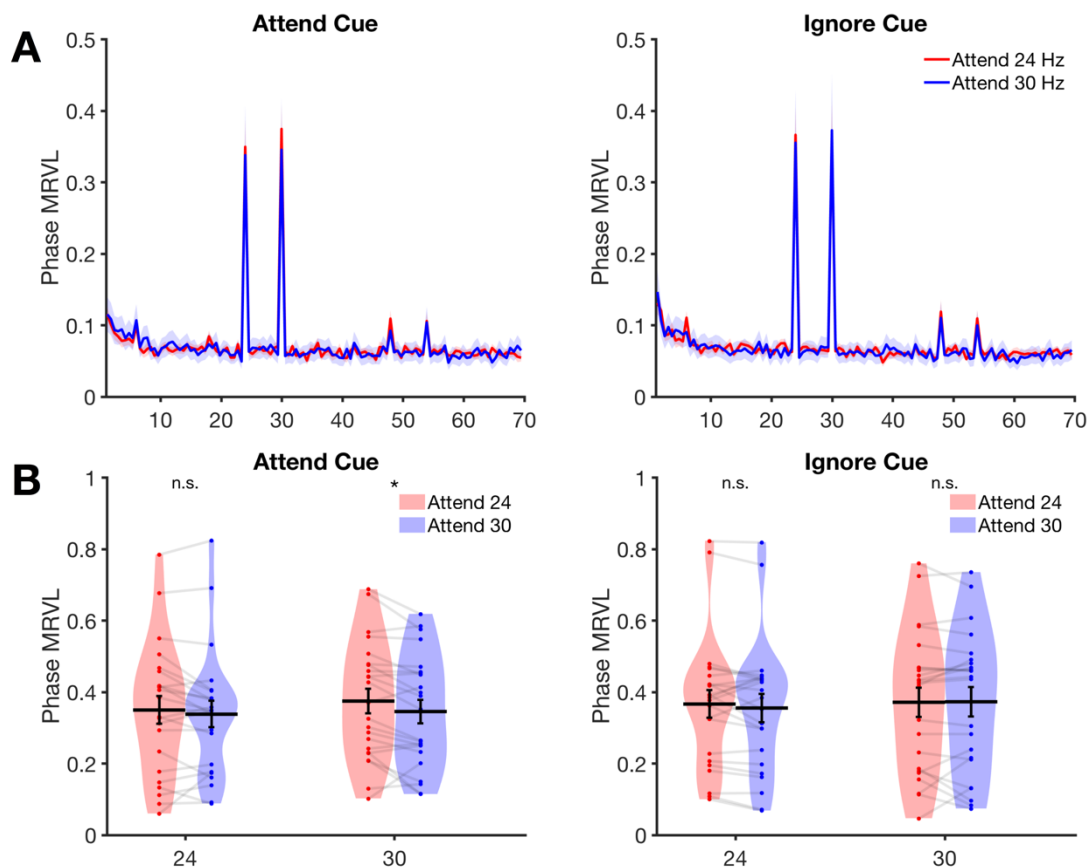

1610  
1611  
1612  
1613  
1614  
1615  
1616  
1617  
1618  
1619  
1620  
1621

1622 **Appendix O. P3 component at electrodes Pz and POz, split by whether or not a**  
1623 **response was made. (A) No response made, “attend cue” condition. (B) No response**  
1624 **made, “ignore cue” condition. (C) Response made, “attend cue” condition. (D)**  
1625 **Response made, “ignore cue” condition. Shaded error bars represent standard error of**  
1626 **the mean.**

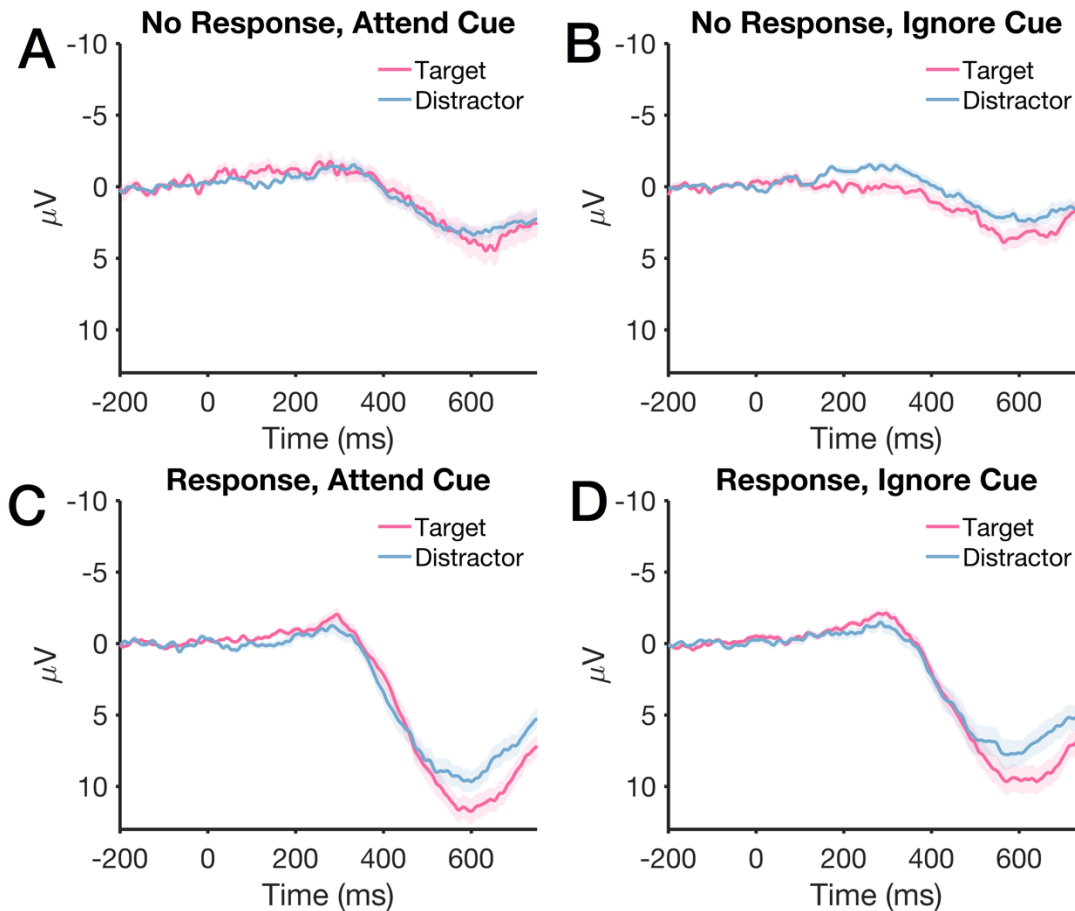

1627  
1628  
1629  
1630  
1631  
1632  
1633  
1634  
1635  
1636  
1637  
1638  
1639  
1640  
1641

1642 **Appendix P. Study overview for studies employing a variant of the “competing**  
 1643 **gratings” task.** From left to right, columns indicate: “Exp.” = Experiment number out of  
 1644 those reviewed, “Ref” = Paper reference, “N” = number of subjects in the experiment,  
 1645 “Total Trials” = total number of trials completed by the participant, “Trials Per Cond.” =  
 1646 The number of trials that could be analyzed per condition (i.e., after excluding target and  
 1647 distractor onsets), “Stimulus Duration” = the duration, in seconds, that participants  
 1648 attended the stimulus, “Freq.” = Frequency, in Hertz (Hz), that the stimuli flickered at,  
 1649 “Sig” = Qualitative code for the overall presence of a basic attention effects (when  
 1650 expected); 1 = attended > ignored, -1 = attended < ignored, 0.5 = mixed effects across  
 1651 conditions, 0 = null, n/a = statistical values for the basic attention effect not reported  
 1652 directly. Notes: \* Statistics were performed for individuals but not across subjects;  
 1653 standard attention effect in one condition, reversed effect in the other. \*\*Group level  
 1654 statistics not reported. \*\*\*No attention effect for the main flicker frequencies (14.2, 17  
 1655 Hz), but attention effect for the slow oscillating changes to the Gabor’s features (3.14,  
 1656 3.62 Hz).  
 1657

| Exp. | Ref.                          | N  | Total Trials | Trials Per Cond. | Stim. Dur. (s) | Freq. (Hz)                | Sig.  |
|------|-------------------------------|----|--------------|------------------|----------------|---------------------------|-------|
| 1    | (Chen et al., 2003)           | 11 | 16           | 8                | 100            | 7.41, 8.33                | .5*   |
| 2    | (Wang et al., 2007),<br>Exp 1 | 12 | 16           | 8                | 120            | 7.14, 8.33                | 0     |
| 3    | (Wang et al., 2007),<br>Exp 2 | 12 | 16           | 8                | 120            | 7.69, 7.14,<br>8.33       | -1    |
| 4    | (Wang et al., 2007),<br>Exp 3 | 12 | 16           | 8                | 120            | 6.67, 7.14,<br>7.69, 8.33 | -1    |
| 5    | (Allison et al., 2008)        | 14 | 8            | 4                | 60             | 10, 12                    | n/a** |
| 6    | (Keitel & Müller, 2016)       | 13 | 600          | 75               | 3.5            | 3.14, 3.62,<br>14.2, 17   | .5*** |

1658  
 1659

1660 **Appendix Q. Study overview for studies employing a variant of the “whole-field**  
 1661 **flicker” task.** From left to right, columns indicate: “Exp.” = Experiment number out of  
 1662 those reviewed, “Ref” = Paper reference, “N” = number of subjects in the experiment,  
 1663 “Total Trials” = total number of trials completed by the participant, “Trials Per Cond.” =  
 1664 The number of trials that could be analyzed per condition (i.e., after excluding target and  
 1665 distractor onsets), “Stimulus Duration” = the duration, in seconds, that participants  
 1666 attended the stimulus, “Freq.” = Frequency, in Hertz (Hz), of the stimulus flicker, “Sig” =  
 1667 Qualitative code for the overall presence of a basic attention effects (when expected); 1  
 1668 = attended > ignored, -1 = attended < ignored, 0.5 = mixed effects across conditions, 0  
 1669 = null, n/a = statistical values for the basic attention effect not reported directly. Notes:  
 1670 \*Analyzed harmonics (2F, 4F) but not the fundamental frequency. 2F but not 4F had a  
 1671 significant attention effect. \*\* Attention modulation scores were only compared across  
 1672 conditions, not to baseline; they are presumably overall significant, but this was not  
 1673 formally tested.

| Exp. | Ref.                            | N  | Total Trials | Trials Per Cond. | Stim. Dur. (s) | Freq. (Hz)         | Sig.  |
|------|---------------------------------|----|--------------|------------------|----------------|--------------------|-------|
| 7    | (Pei et al., 2002)              | 11 | 20           | 20               | 8              | 2.4, 3             | n/a*  |
| 8    | (Müller et al., 2006)           | 11 | 450          | 153              | 4.114          | 7, 11.67           | 1     |
| 9    | (Andersen et al., 2008)         | 15 | 600          | 90               | 3.092          | 10,12,15, 17.14    | 1     |
| 10   | (Andersen et al., 2009)         | 15 | 432          | 72               | 3.042          | 10, 12             | 1     |
| 11   | (Andersen & Müller, 2010)       | 16 | 480          | 240              | 2              | 11.98, 16.77       | 1     |
| 12   | (Quigley et al., 2010)          | 10 | 440          | 110              | 2.2            | 8, 12              | 1     |
| 13   | (Zhang et al., 2010)            | 18 | 300          | 300              | 4              | 10, 12             | 1     |
| 14   | (Andersen et al., 2012)         | 16 | 300          | 60               | 8.5            | 10, 12             | 1     |
| 15   | (Quigley & Müller, 2014)        | 20 | 320          | 90               | 4.167          | 15, 17             | 1     |
| 16   | (Andersen et al., 2015)         | 15 | 192          | 96               | 15             | 8, 10, 12, 15      | 1     |
| 17   | (Forschack et al., 2017)        | 23 | 480          | 120              | 1.783          | 10, 12.5, 15, 17.5 | 1     |
| 18   | (Martinovic & Andersen, 2018)   | 9  | 768          | 23               | 6.5            | 10, 12             | n/a** |
| 19   | (Martinovic et al., 2018) Exp 1 | 11 | 600          | 70               | 3.14           | 8.57, 10, 12, 15   | 1     |
| 20   | (Martinovic et al., 2018) Exp 2 | 14 | 600          | 70               | 3.14           | 8.57, 10, 12, 15   | 1     |
| 21   | (Steinhauser & Andersen, 2019)  | 17 | 1600         | 400              | 1              | 10, 15             | 1     |

1674  
 1675  
 1676  
 1677



1678 **Appendix R. Study overview for studies employing a variant of the “hemifield**  
 1679 **flicker” task.** From left to right, columns indicate: “Exp.” = Experiment number out of  
 1680 those reviewed, “Ref” = Paper reference, “N” = number of subjects in the experiment,  
 1681 “Total Trials” = total number of trials completed by the participant, “Trials Per Cond.” =  
 1682 The number of trials that could be analyzed per condition (i.e., after excluding target and  
 1683 distractor onsets), “Stimulus Duration” = the duration, in seconds, that participants  
 1684 attended the stimulus, “Freq.” = Frequency, in Hertz (Hz), of the stimulus flicker, “Sig” =  
 1685 Qualitative code for the overall presence of a basic attention effects (when expected); 1  
 1686 = attended > ignored, -1 = attended < ignored, 0.5 = mixed effects across conditions, 0  
 1687 = null, n/a = statistical values for the basic attention effect not reported directly.

| Exp. | Ref.                             | N  | Total Trials | Trials Per Cond. | Stim. Dur. (s) | Freq. (Hz)                | Sig. |
|------|----------------------------------|----|--------------|------------------|----------------|---------------------------|------|
| 22   | (Andersen et al., 2011)          | 19 | 600          | 100              | 3.05           | 8.46, 11.85, 14.81, 19.75 | 1    |
| 23   | (Andersen et al., 2013)<br>Exp 1 | 13 | 560          | 160              | 2.94           | 7.5, 8.57, 10, 12         | 1    |
| 24   | (Andersen et al., 2013)<br>Exp 2 | 11 | 560          | 320              | 2.94           | 7, 8.57, 10, 12           | 1    |
| 25   | (Störmer & Alvarez, 2014)        | 16 | 640          | 160              | 2.6            | 7.1, 8.5, 10.7            | 1    |
| 26   | (Müller et al., 2018)            | 23 | 480          | 120              | 1.783          | 6.5, 8.5, 11.5, 13.5      | 1    |
| 27   | (Adamian et al., 2019)           | 16 | 672          | 128              | 2.94           | 7.5, 8.57, 10, 12         | 1    |

1688  
 1689  
 1690  
 1691  
 1692  
 1693  
 1694  
 1695  
 1696  
 1697  
 1698  
 1699  
 1700  
 1701  
 1702  
 1703  
 1704  
 1705  
 1706  
 1707

1708 **Appendix S. Study overview for studies employing a variant of the “attend**  
 1709 **central, peripheral flicker” task.** From left to right, columns indicate: “Exp.” =  
 1710 Experiment number out of those reviewed, “Ref” = Paper reference, “N” = number of  
 1711 subjects in the experiment, “Total Trials” = total number of trials completed by the  
 1712 participant, “Trials Per Cond.” = The number of trials that could be analyzed per  
 1713 condition (i.e., after excluding target and distractor onsets), “Stimulus Duration” = the  
 1714 duration, in seconds, that participants attended the stimulus, “Freq.” = Frequency, in  
 1715 Hertz (Hz), of the stimulus flicker, “Sig” = Qualitative code for the overall presence of a  
 1716 basic attention effects (when expected); 1 = attended > ignored, -1 = attended <  
 1717 ignored, 0.5 = mixed effects across conditions, 0 = null, n/a = statistical values for the  
 1718 basic attention effect not reported directly. Notes: \*No attention effect at *a priori*  
 1719 electrode; other electrodes were examined post-hoc, but statistics were not reported for  
 1720 each. \*\*Significant in 1 of 2 expected conditions.

| Exp. | Ref.                            | N  | Total Trials | Trials Per Cond. | Stim. Dur. (s) | Freq. (Hz)         | Sig. |
|------|---------------------------------|----|--------------|------------------|----------------|--------------------|------|
| 29   | (Painter et al., 2014)<br>Exp 1 | 20 | 288          | 144              | 7.2            | 12.5,<br>16.7      | 1    |
| 30   | (Painter et al., 2014)<br>Exp 2 | 20 | 216          | 216              | 8.4            | 7.6, 13.3,<br>17.8 | 1    |
| 31   | (Painter et al., 2015, p. 2)    | 20 | 512          | 128              | 8              | 8, 12              | 0*   |
| 32   | (Jiang et al., 2017)            | 23 | 288          | 144              | 8.4            | 12, 15             | .5** |
| 33   | (Chu & D’Zmura, 2019)<br>Exp 1  | 20 | 128          | 32               | 7              | 12.5,<br>18.75     | 1    |
| 34   | (Chu & D’Zmura, 2019)<br>Exp 2  | 21 | 128          | 32               | 9              | 12.5,<br>18.75     | 1    |

1721  
 1722  
 1723  
 1724  
 1725  
 1726  
 1727  
 1728  
 1729  
 1730  
 1731  
 1732  
 1733  
 1734  
 1735  
 1736  
 1737

1738 **Appendix T. Accuracy and task variant for studies where participants detected a**  
 1739 **target within the flickering stimulus (whole-field and hemifield flicker tasks).** To  
 1740 test if the difficulty of our task may have contributed to our null results, we examined  
 1741 behavior from studies in which participants monitored for a target in the flickering  
 1742 stimulus (i.e., whole-field and hemifield flicker tasks). We also noted the type of target  
 1743 and how long it was on the screen. Notes: †Values were not listed in the text, so some  
 1744 values were approximated based on the figures (e.g., hit rates or  $d'$  depicted in a bar  
 1745 graph). \*Analyzed harmonics (2F, 4F) but not the fundamental frequency. 2F but not 4F  
 1746 had a significant attention effect. \*\*Attention modulation scores were only compared  
 1747 across conditions, not to baseline; they were presumably significant overall, but this was  
 1748 not formally tested.

| Exp. | Ref.                               | Behavior             | Target type                 | Dur. (ms) | Sig.  |
|------|------------------------------------|----------------------|-----------------------------|-----------|-------|
| 7    | (Pei et al., 2002)                 | n/a                  | No Targets                  | n/a       | n/a*  |
| 8    | (Müller et al., 2006)              | $d' = 1.95 - 2.89$   | 75% Coherent Motion         | 586       | 1     |
| 9    | (Andersen et al., 2008)            | $d' = 2.74 - 3.25$   | 70% Coherent Motion         | 500       | 1     |
| 10   | (Andersen et al., 2009)            | $d' = 2.67 - 3.23†$  | 20% Luminance Decrement     | 200       | 1     |
| 11   | (Andersen & Müller, 2010)          | $d' = 1.83$          | 75% Coherent Motion         | 298       | 1     |
| 12   | (Quigley et al., 2010)             | $d' = 2.665$         | 85% Coherent Motion         | 556       | 1     |
| 13   | (Zhang et al., 2010)               | n/a                  | No Targets                  | n/a       | 1     |
| 14   | (Andersen et al., 2012)            | $d' = 2.64$          | 50% Coherent Motion         | 400       | 1     |
| 15   | (Quigley & Müller, 2014)           | Acc = 87.5% - 98%†   | 40% Coherent Oblique Motion | 500       | 1     |
| 16   | (Andersen et al., 2015)            | $d' = 1.3 - 1.75†$   | 70% Coherent Motion         | 500       | 1     |
| 17   | (Forschack et al., 2017)           | $d' = 2$             | 60% Coherent Motion         | 300       | 1     |
| 18   | (Martinovic & Andersen, 2018)      | $d' = 0.8 - 3.0†$    | 50% Coherent Motion         | 400       | n/a** |
| 19   | (Martinovic et al., 2018)<br>Exp 1 | $d' = 1.05$          | 50% Coherent Motion         | 400       | 1     |
| 20   | (Martinovic et al., 2018)<br>Exp 2 | $d' = 1.0$           | 50% Coherent Motion         | 400       | 1     |
| 21   | (Steinhauser & Andersen, 2019)     | Acc = 90.3%          | 75% Coherent Motion         | 500       | 1     |
| 22   | (Andersen et al., 2011)            | $d' = 0.95 - 2.8$    | 75% Coherent Motion         | 500       | 1     |
| 23   | (Andersen et al., 2013)<br>Exp 1   | $d' = 2.133 - 3.111$ | 20% Luminance Decrement     | 200       | 1     |
| 24   | (Andersen et al., 2013)<br>Exp 2   | $d' = 2.637$         | 20% Luminance Decrement     | 200       | 1     |
| 25   | (Störmer & Alvarez, 2014)          | Acc = 78%            | 80% Coherent Motion         | 230       | 1     |
| 26   | (Müller et al., 2018)              | $d' = 1.81$          | 60% Coherent Motion         | 300       | 1     |
| 27   | (Adamian et al., 2019)             | $d' = 2.8†$          | 20% Luminance Decrement     | 200       | 1     |

1749

**A**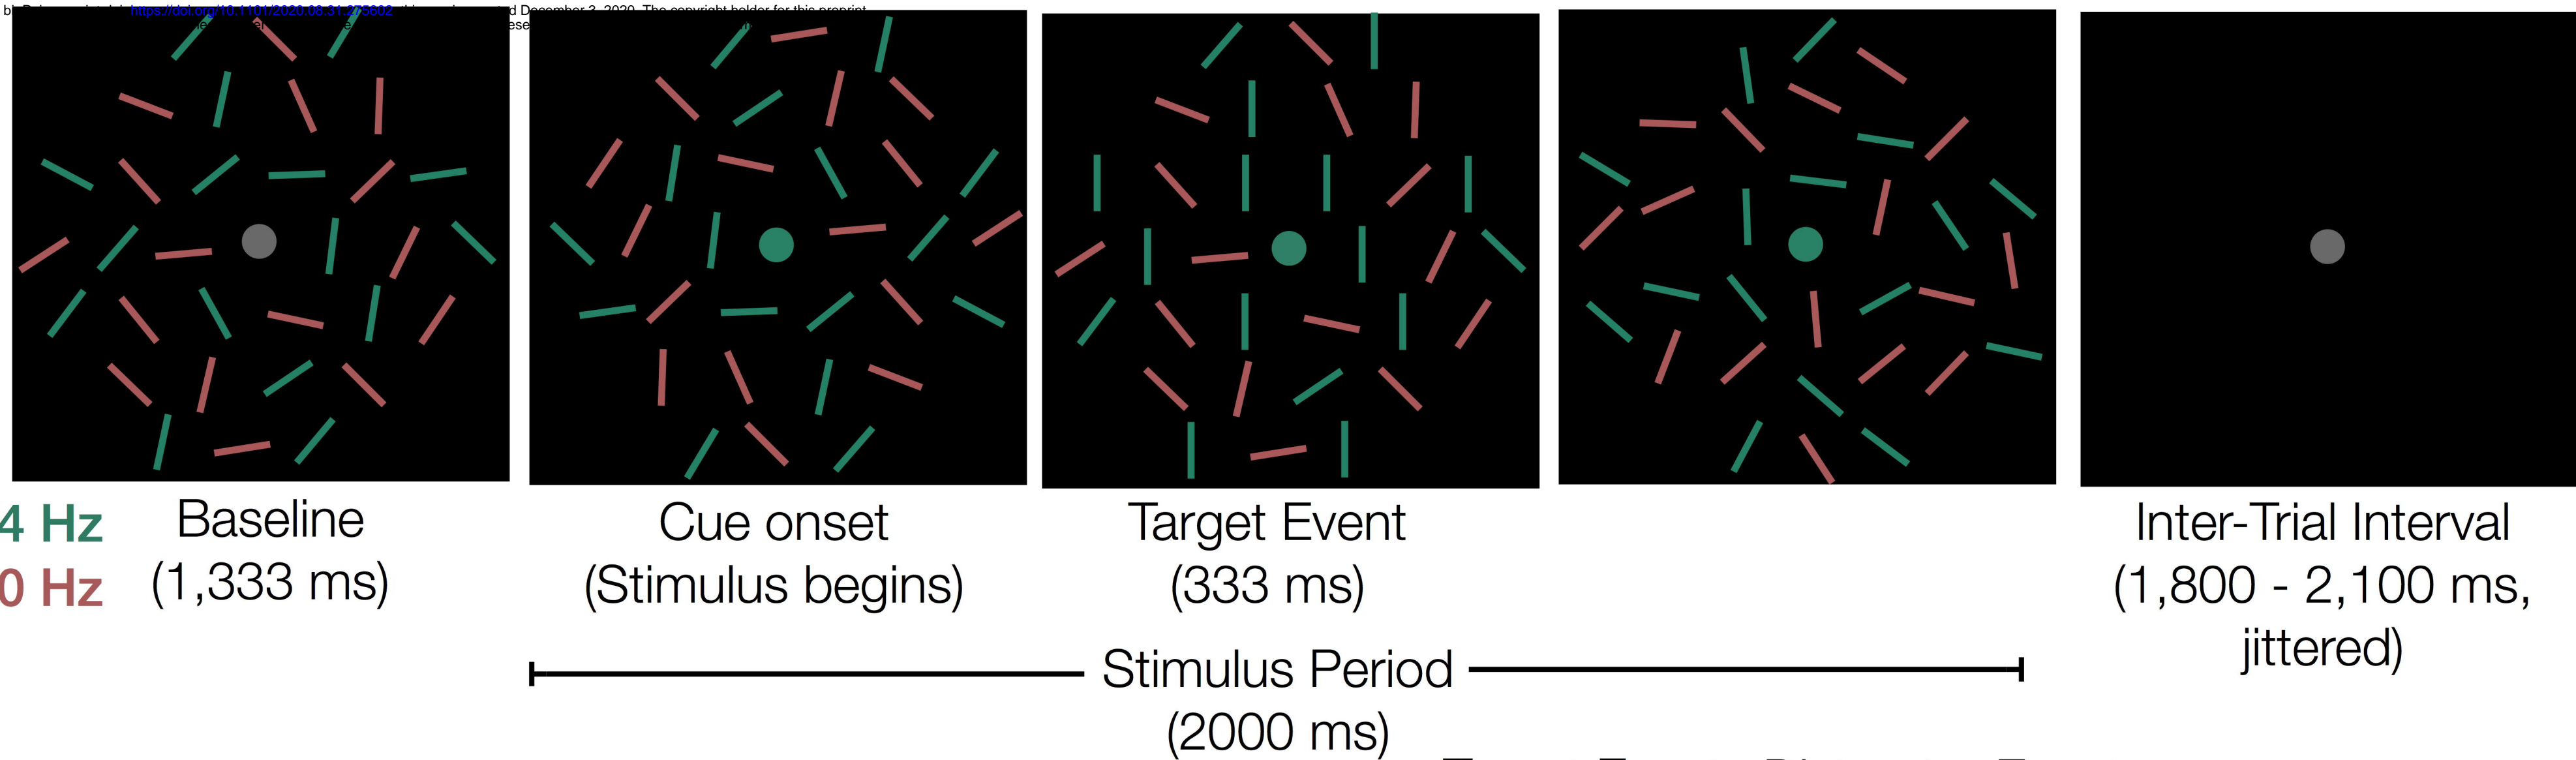**B**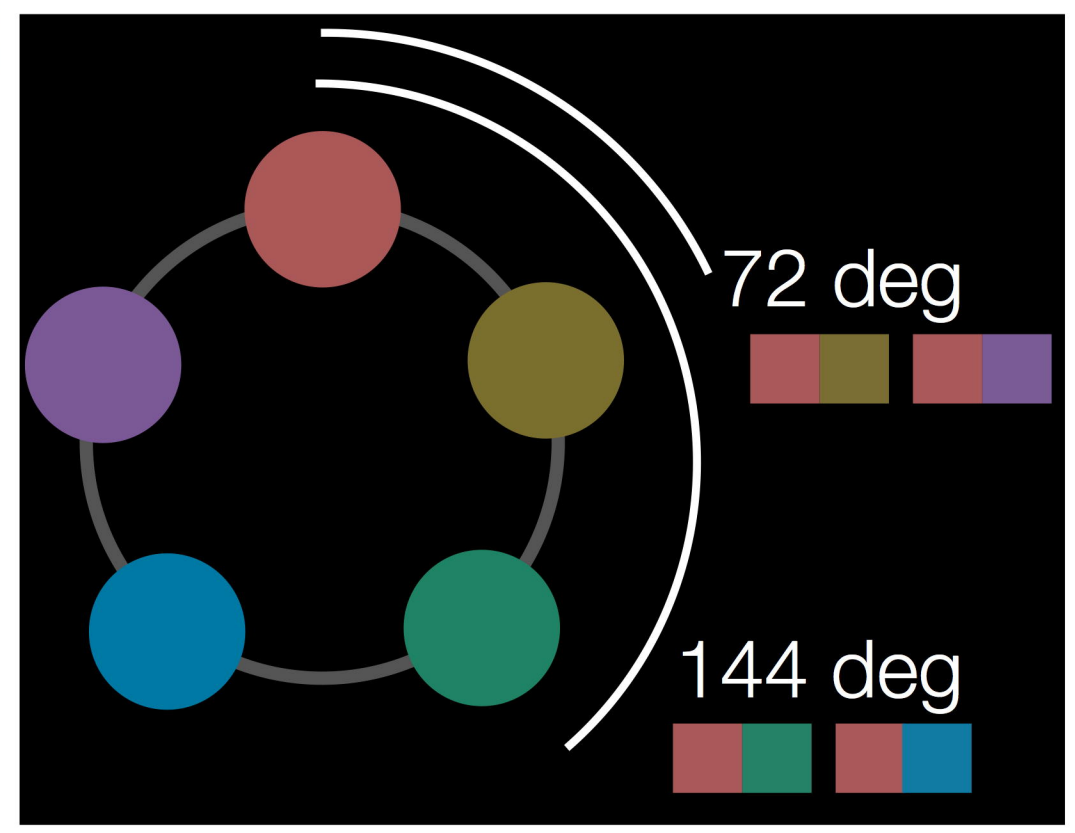**C**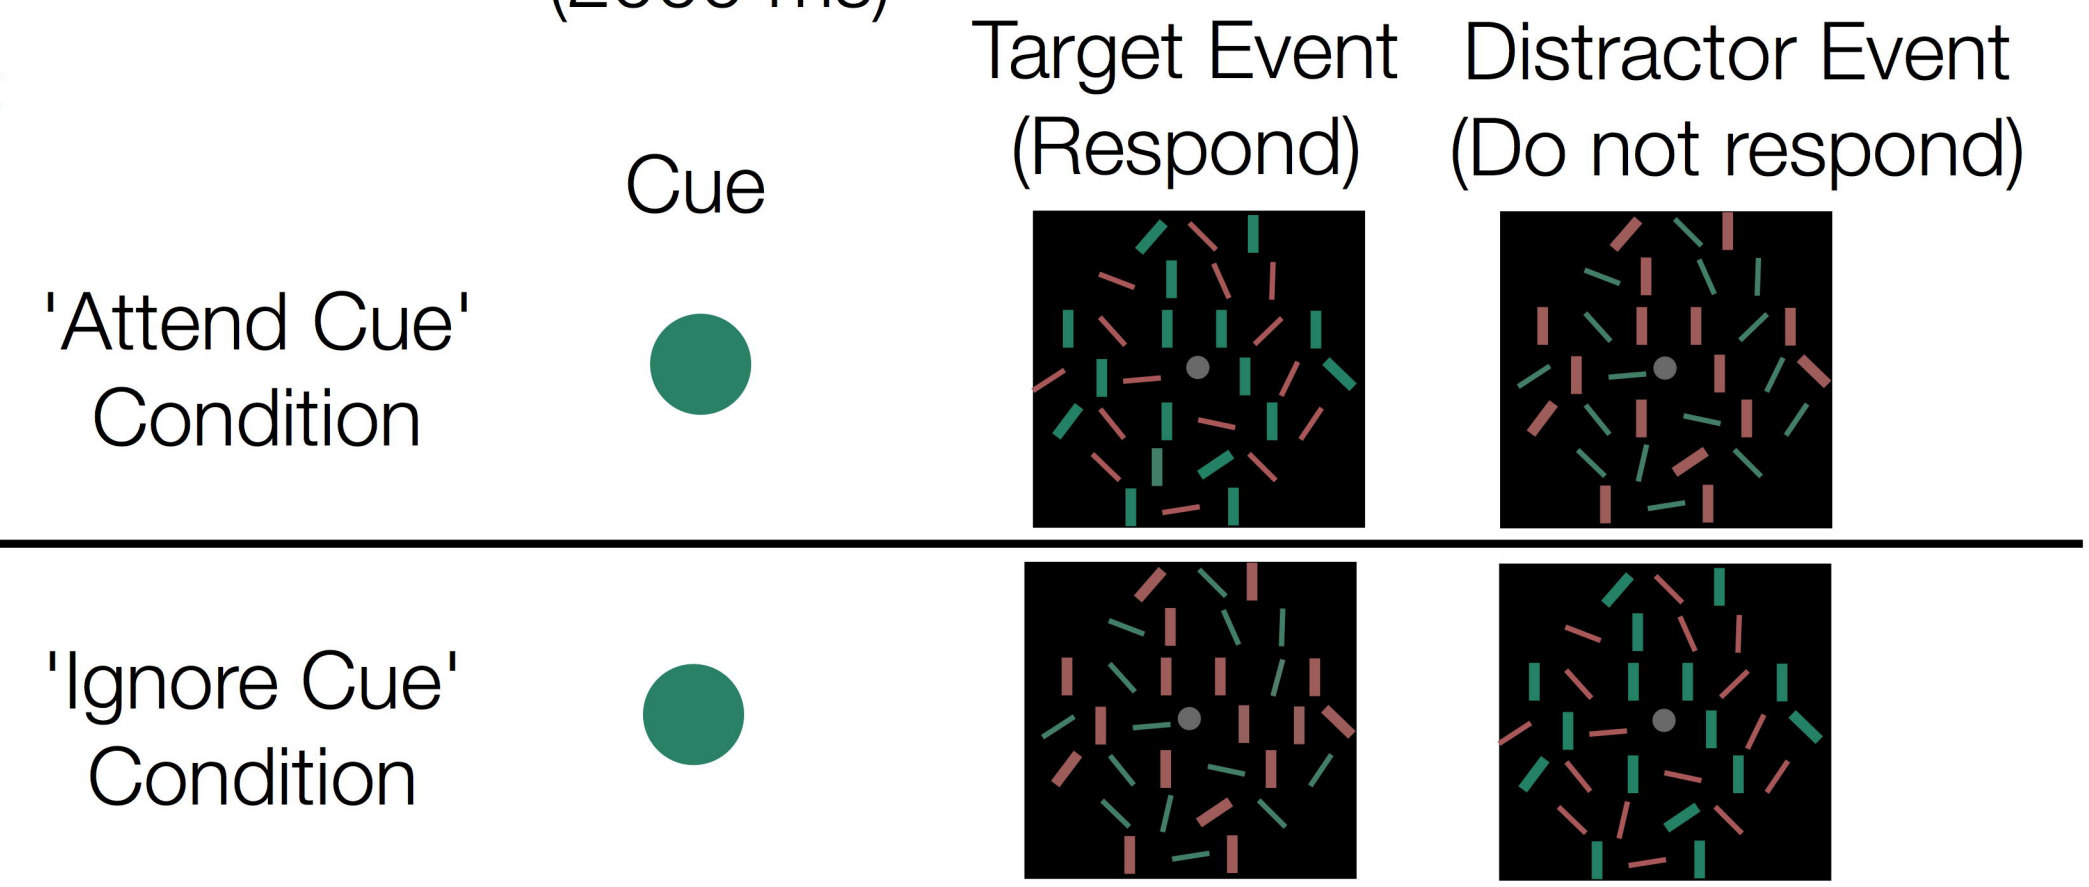

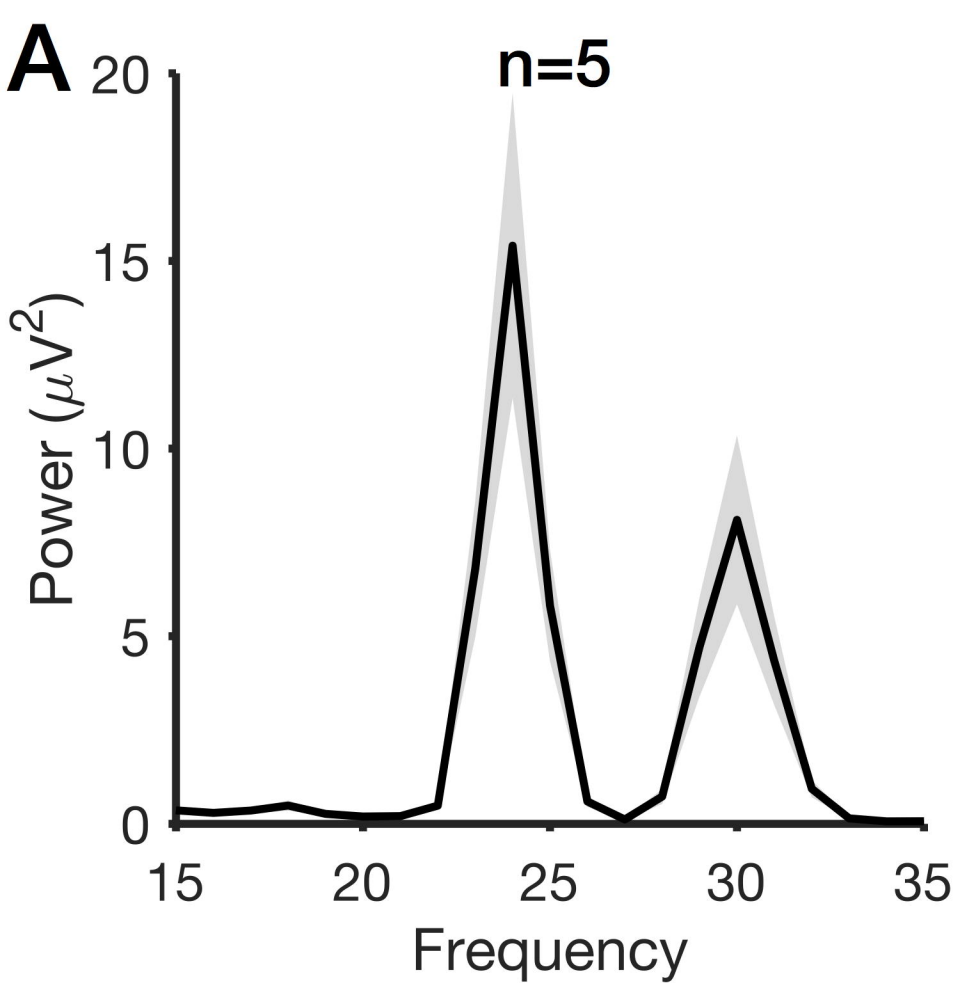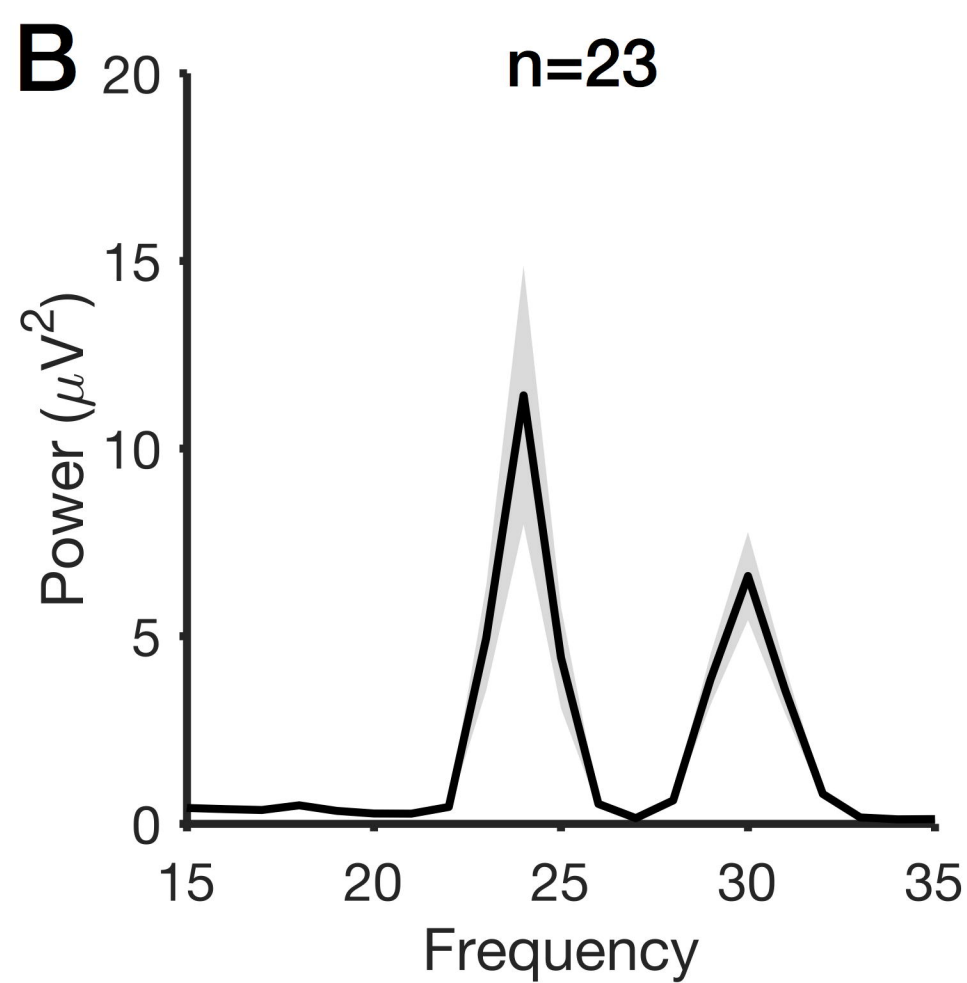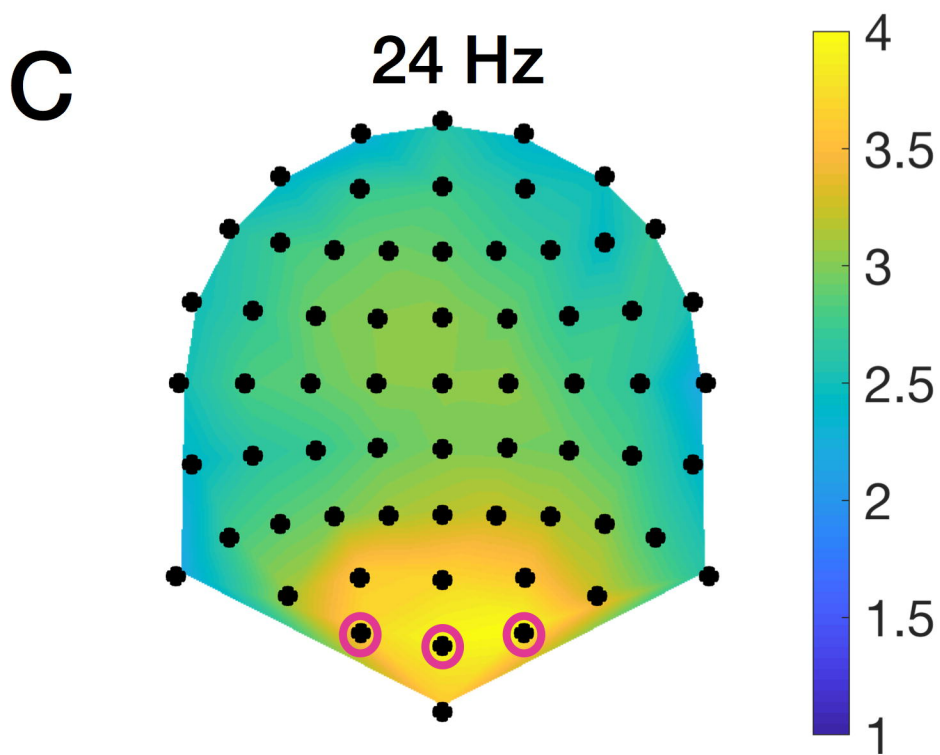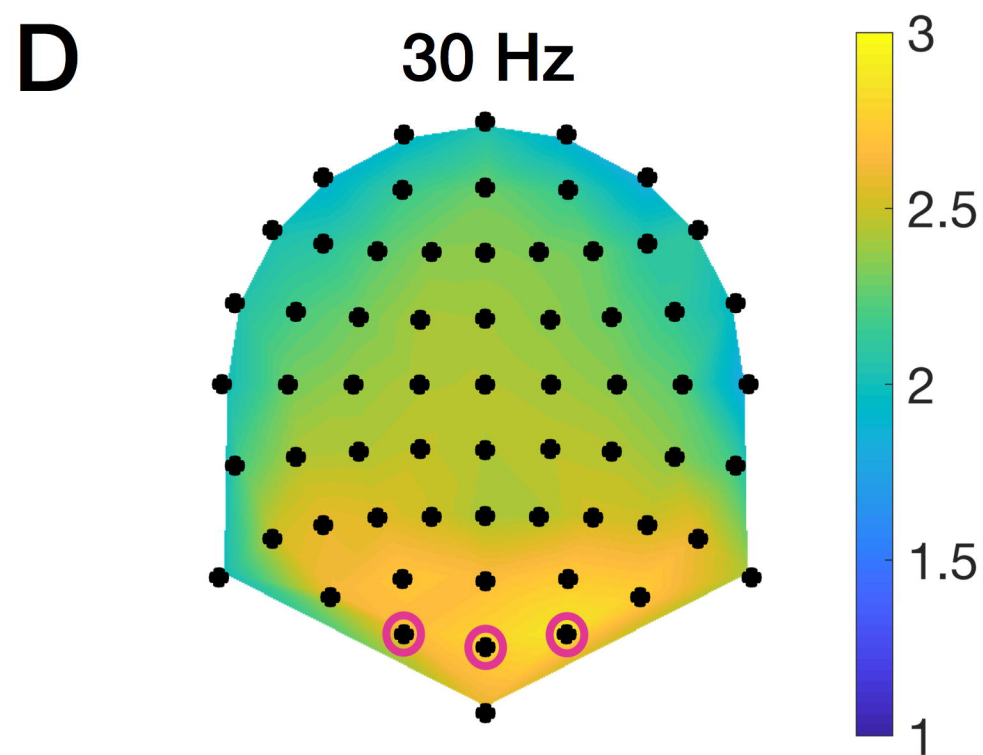

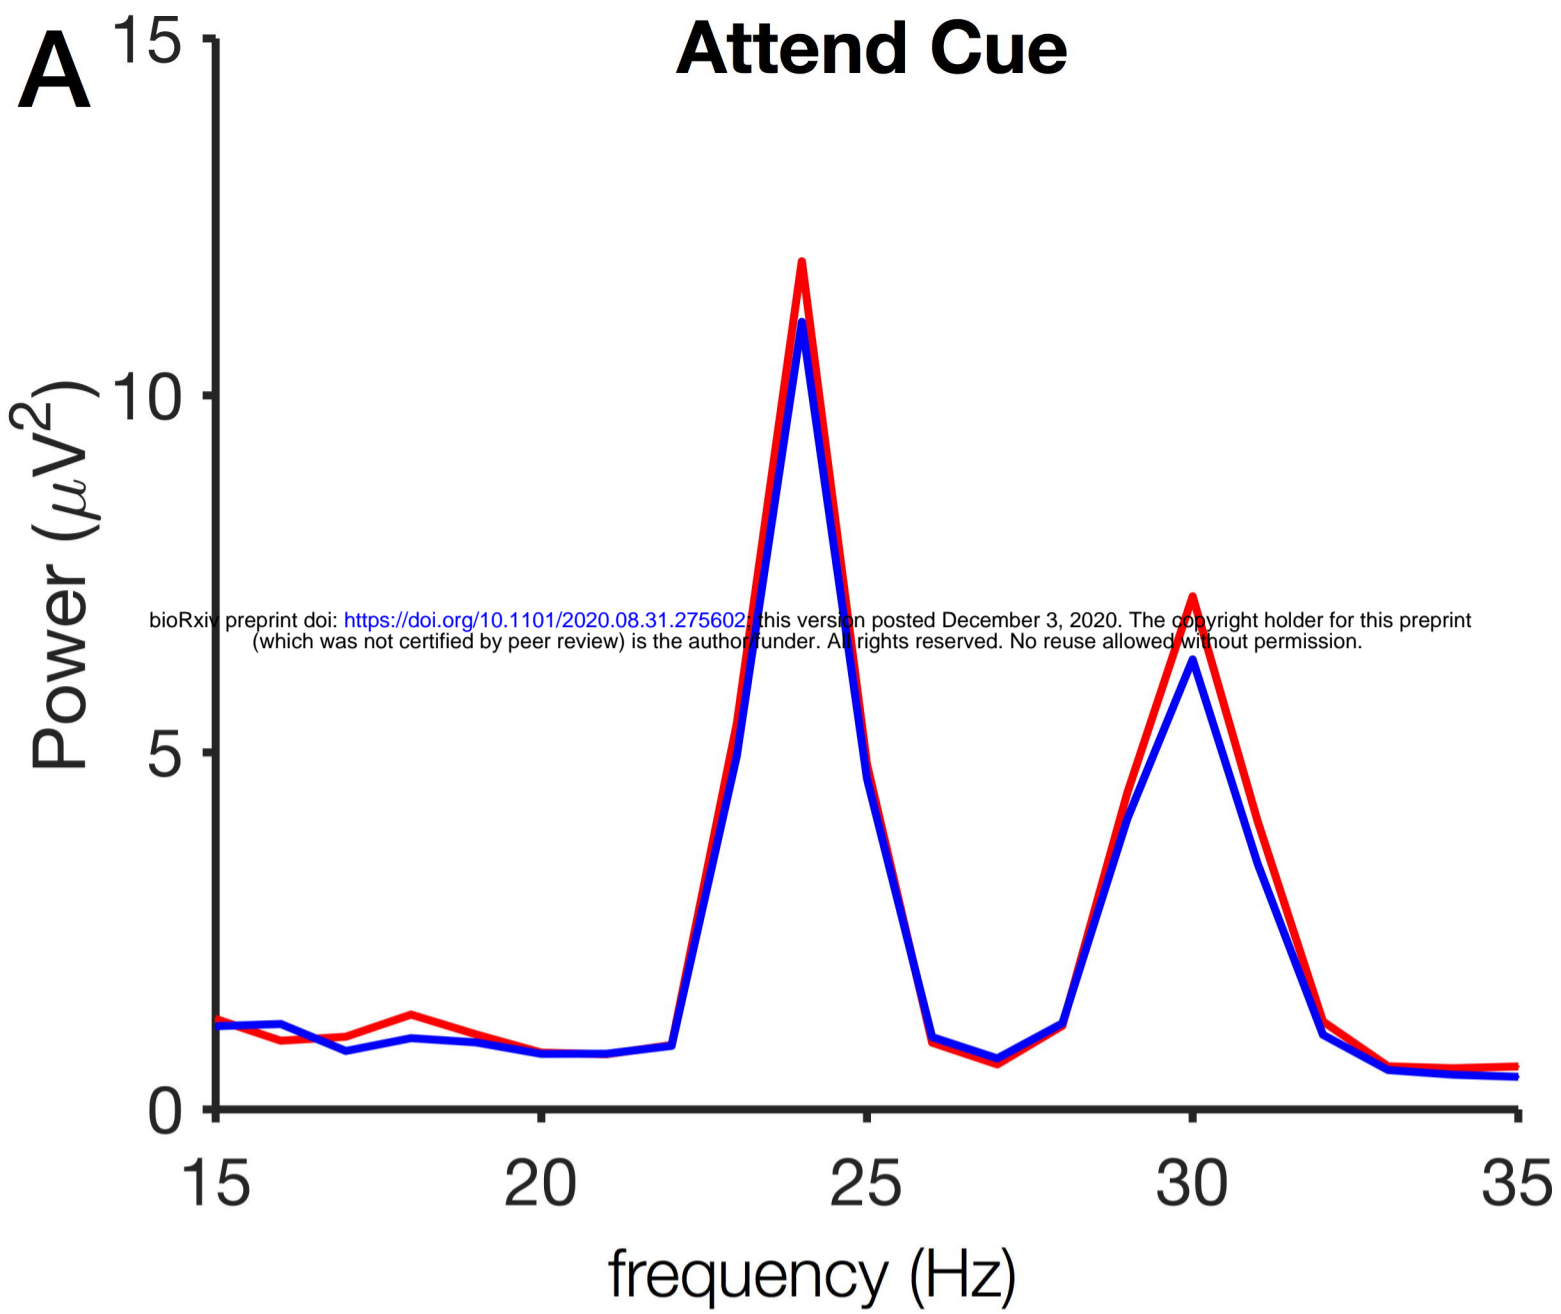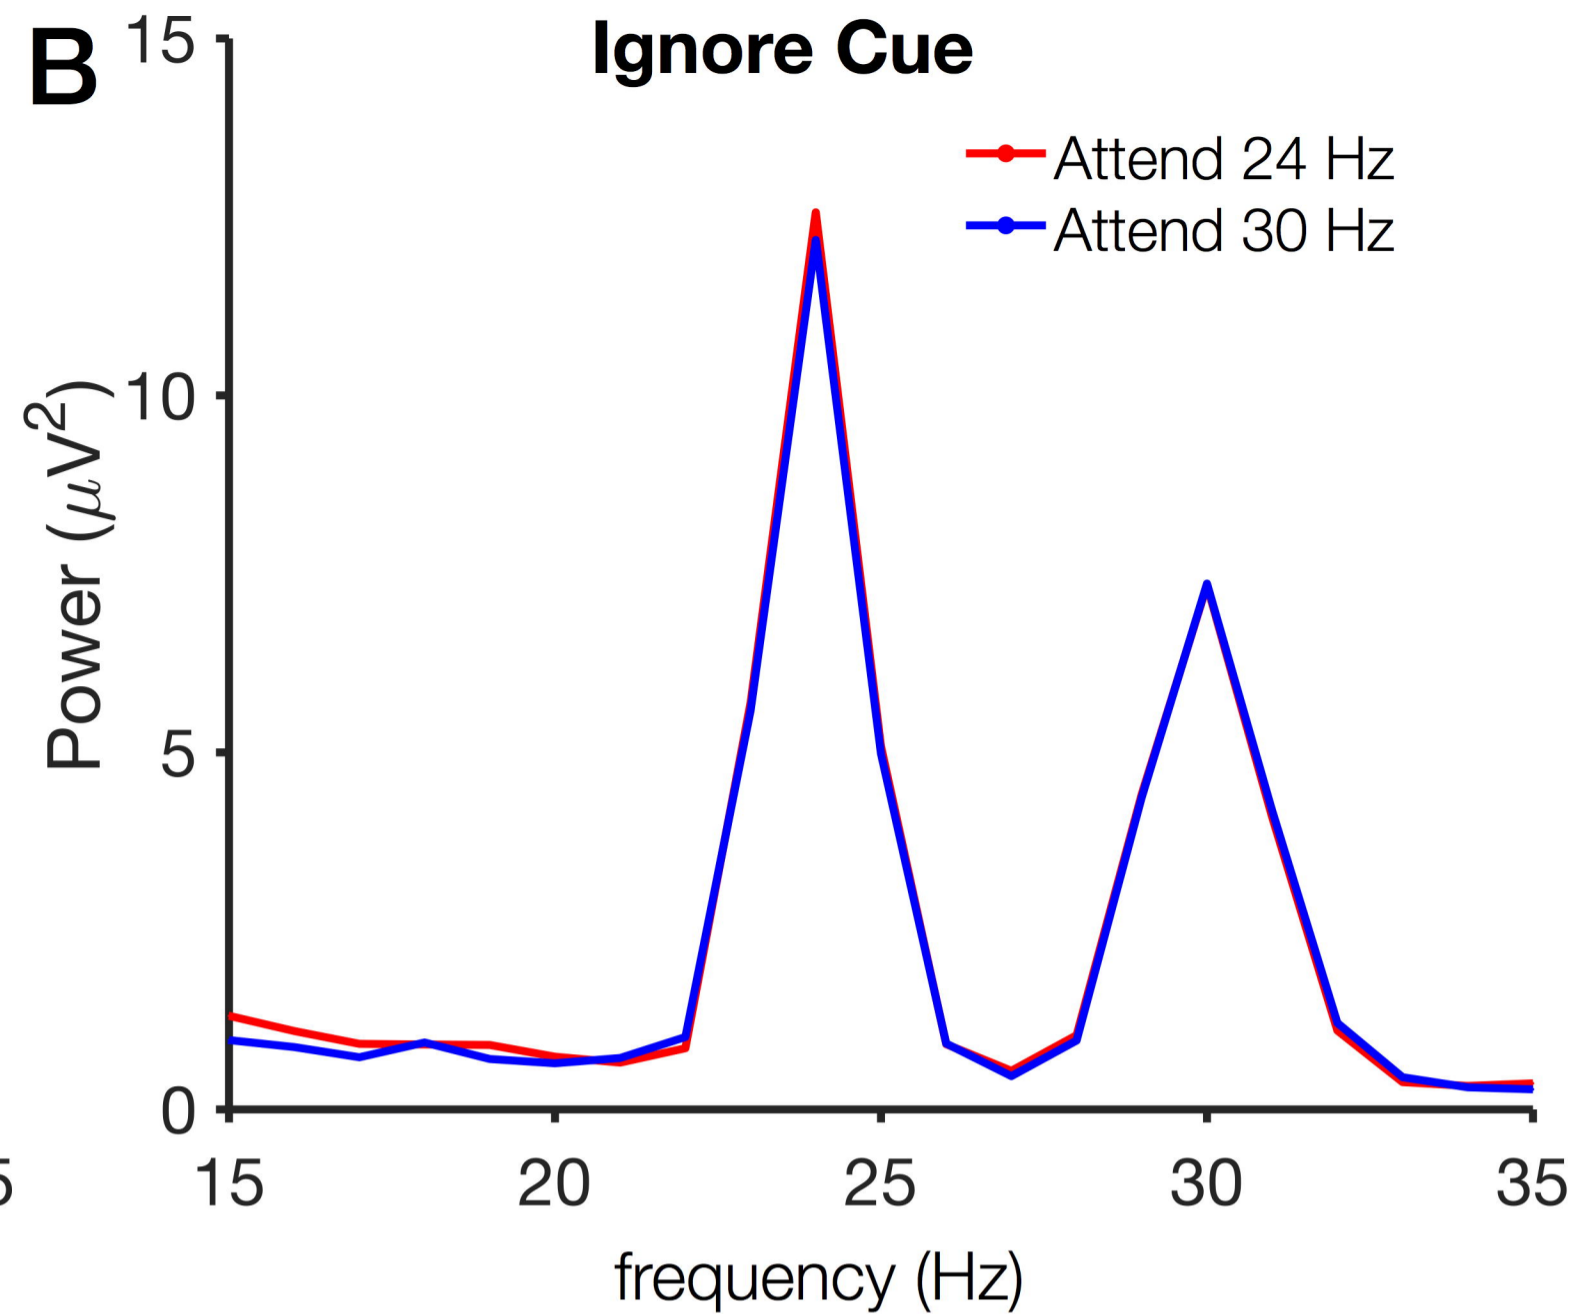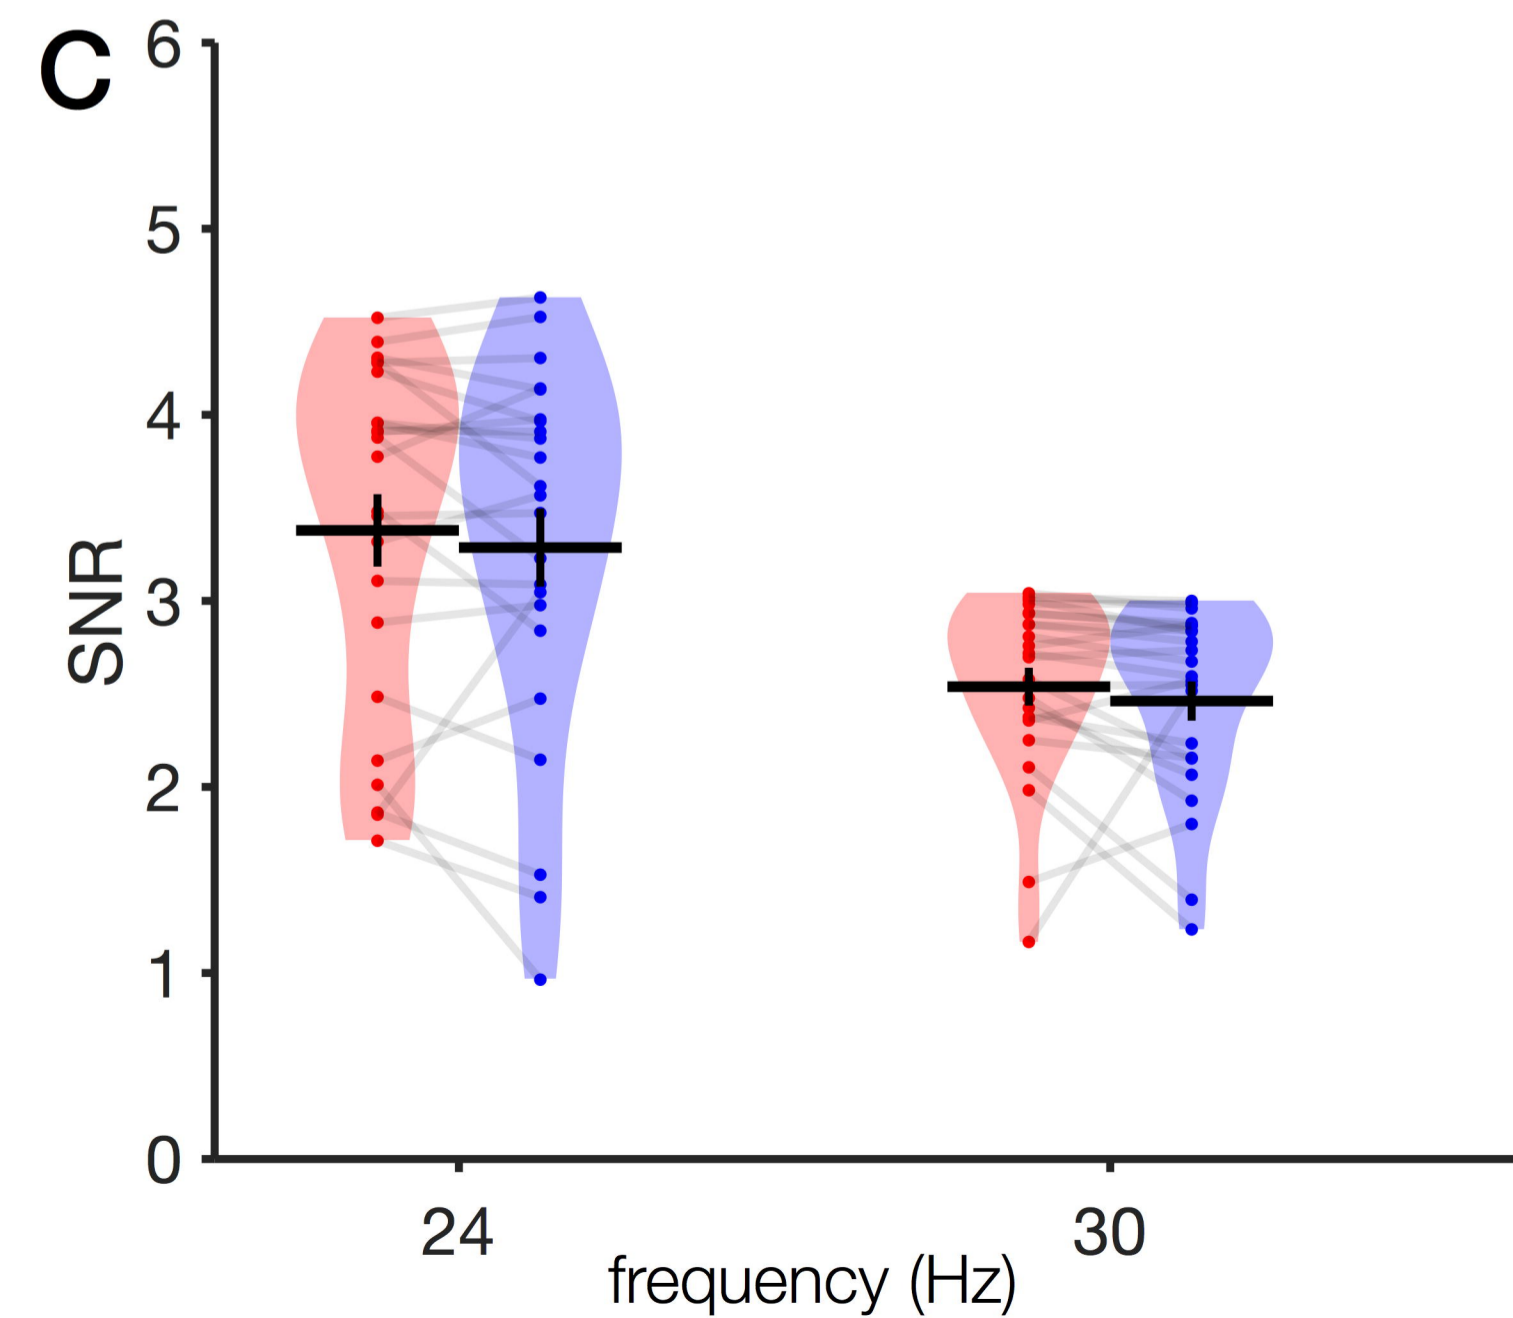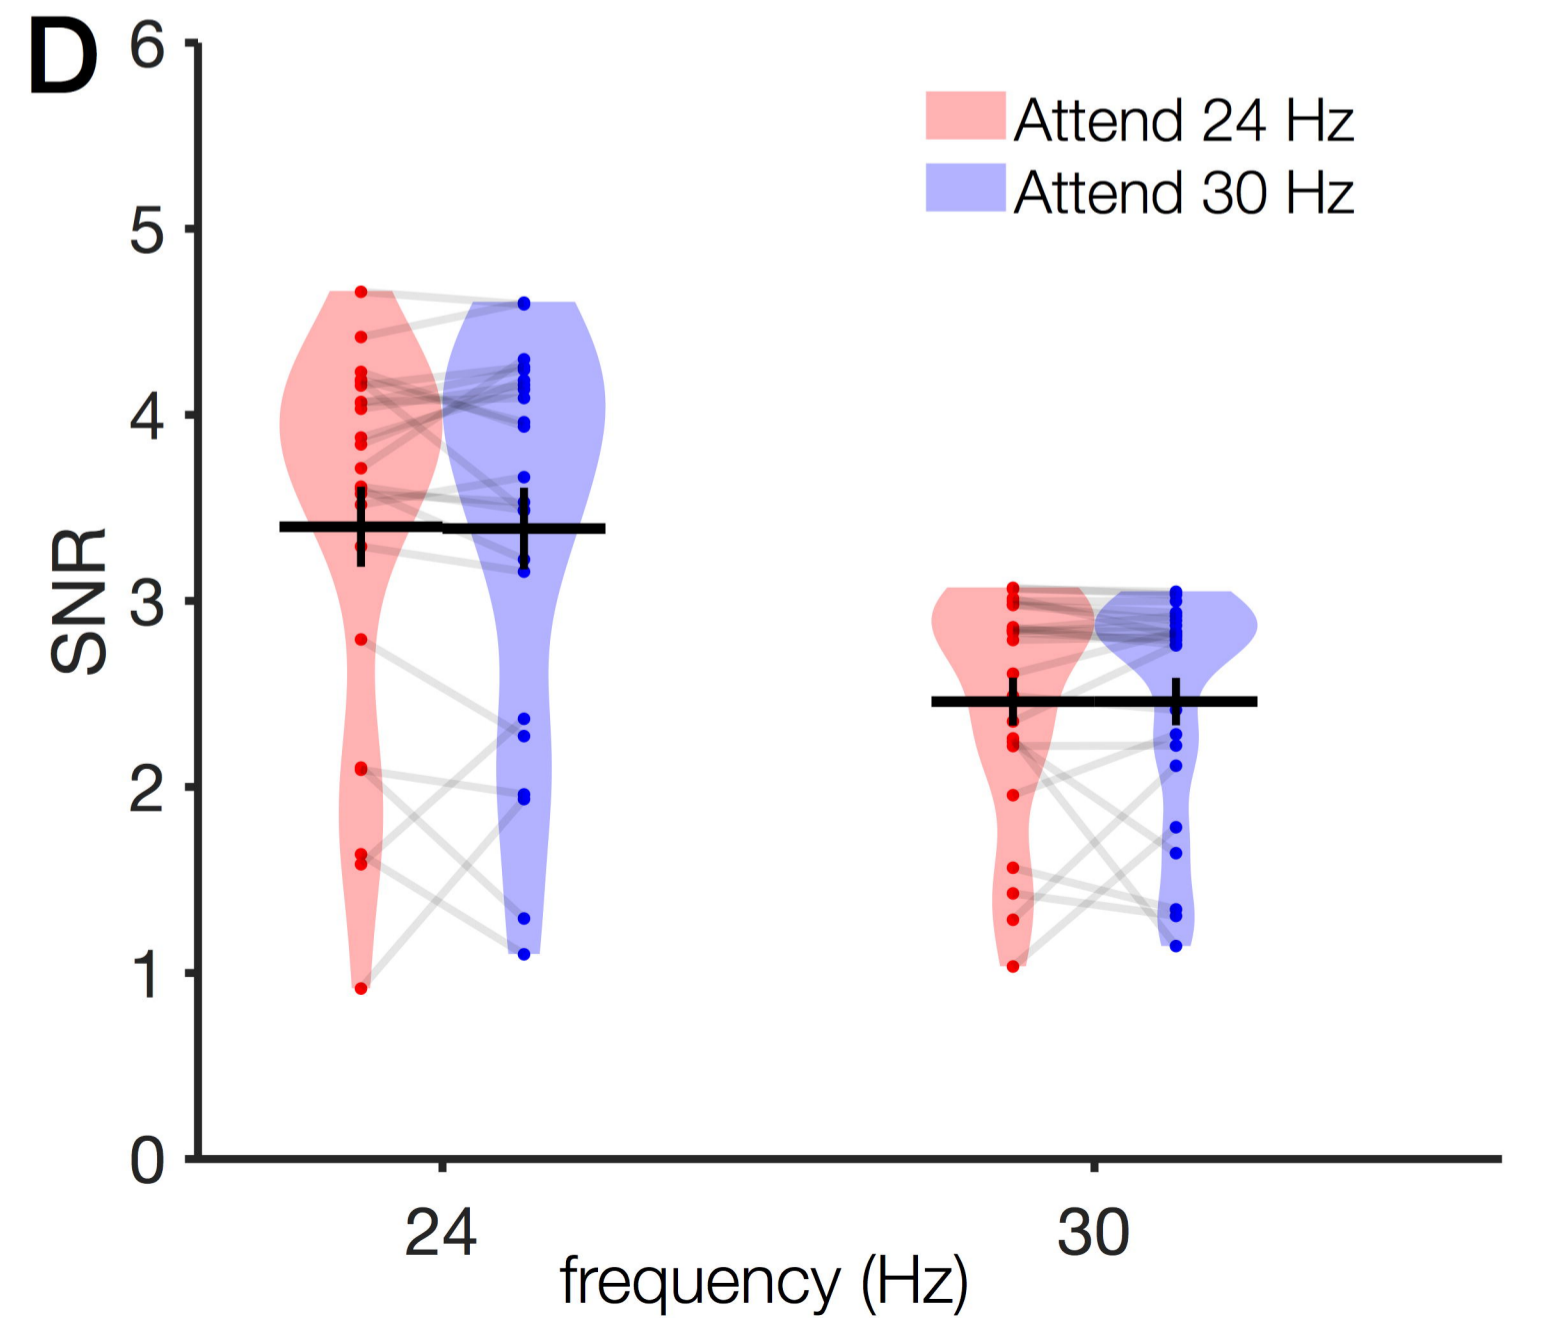

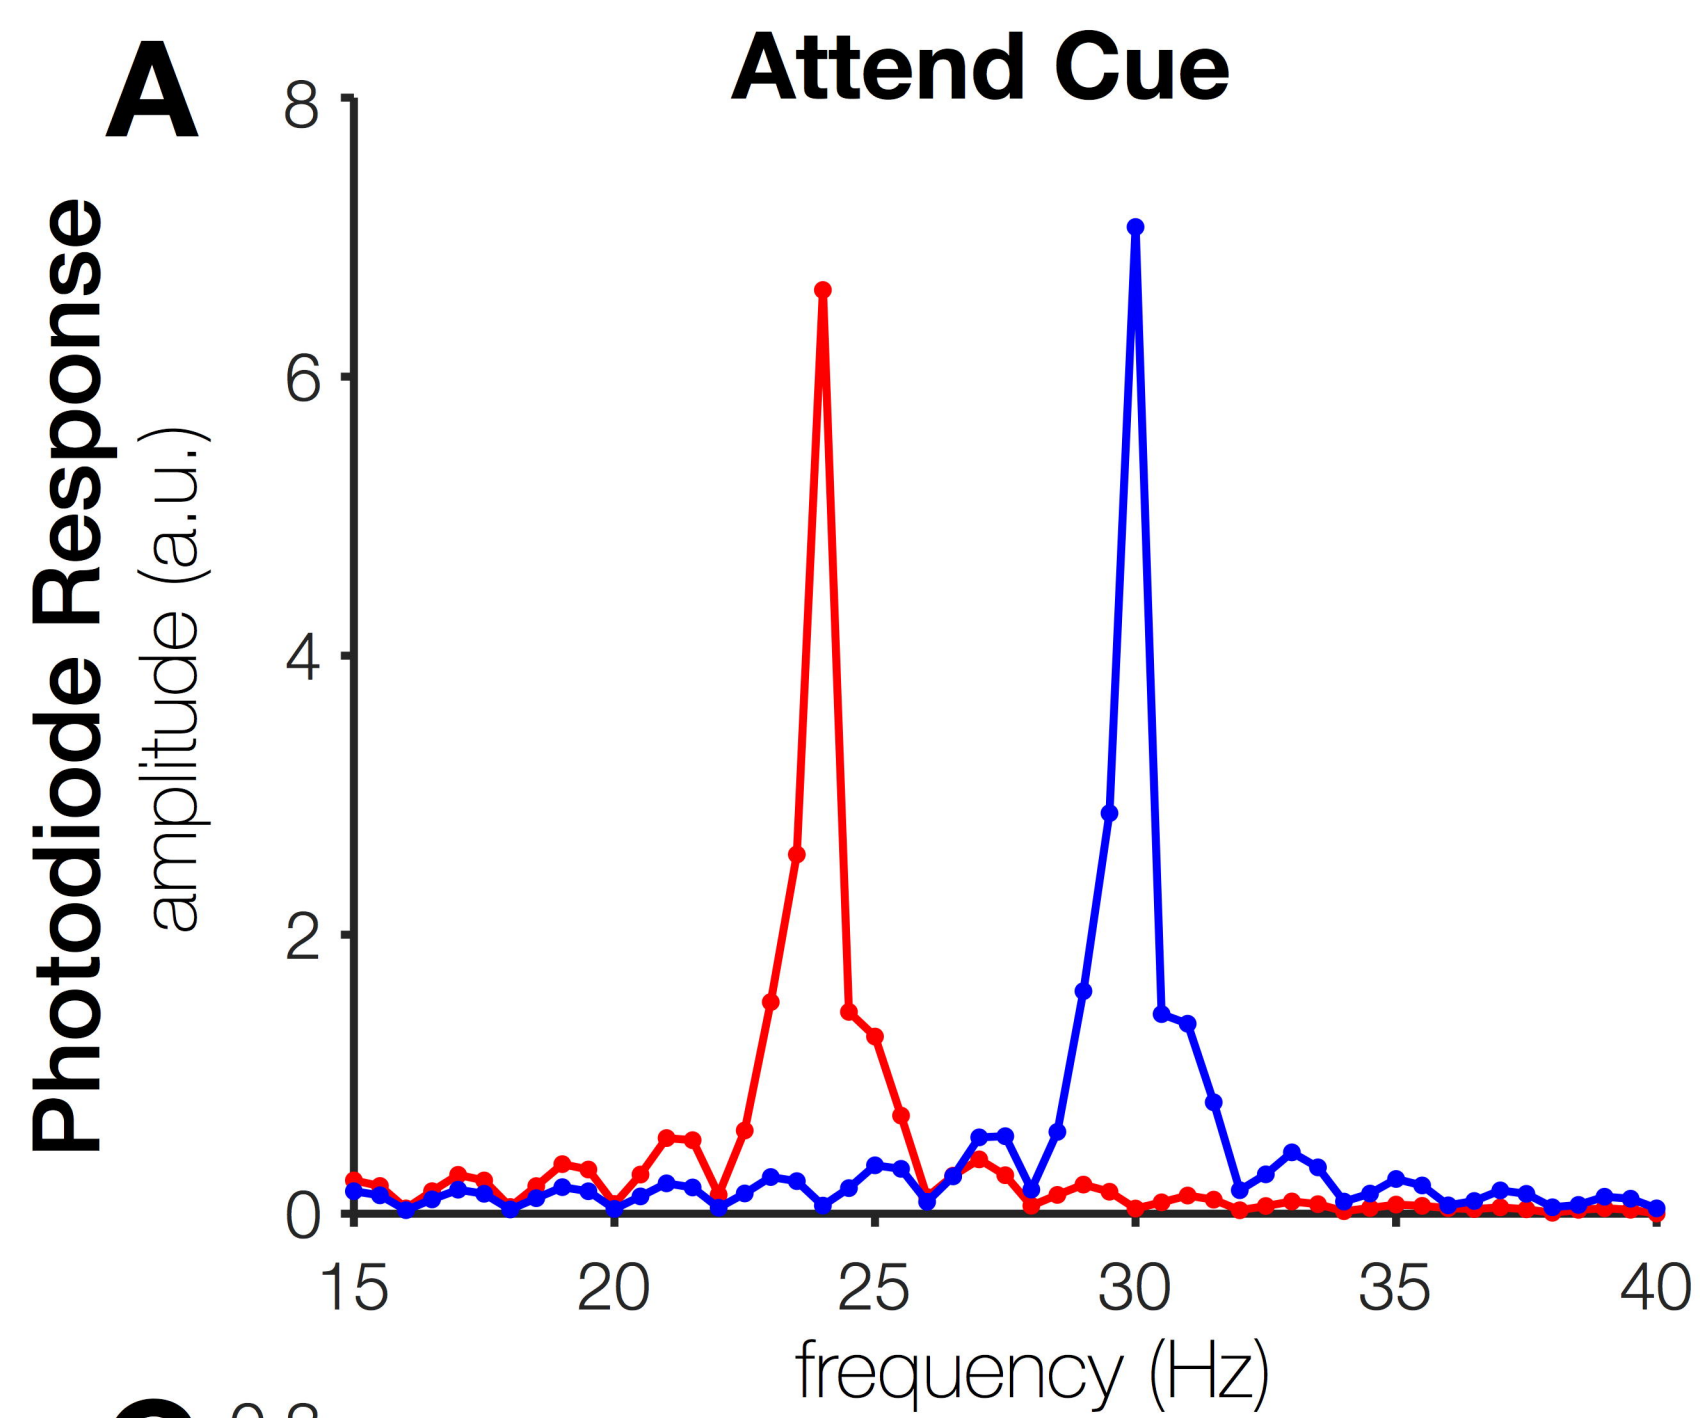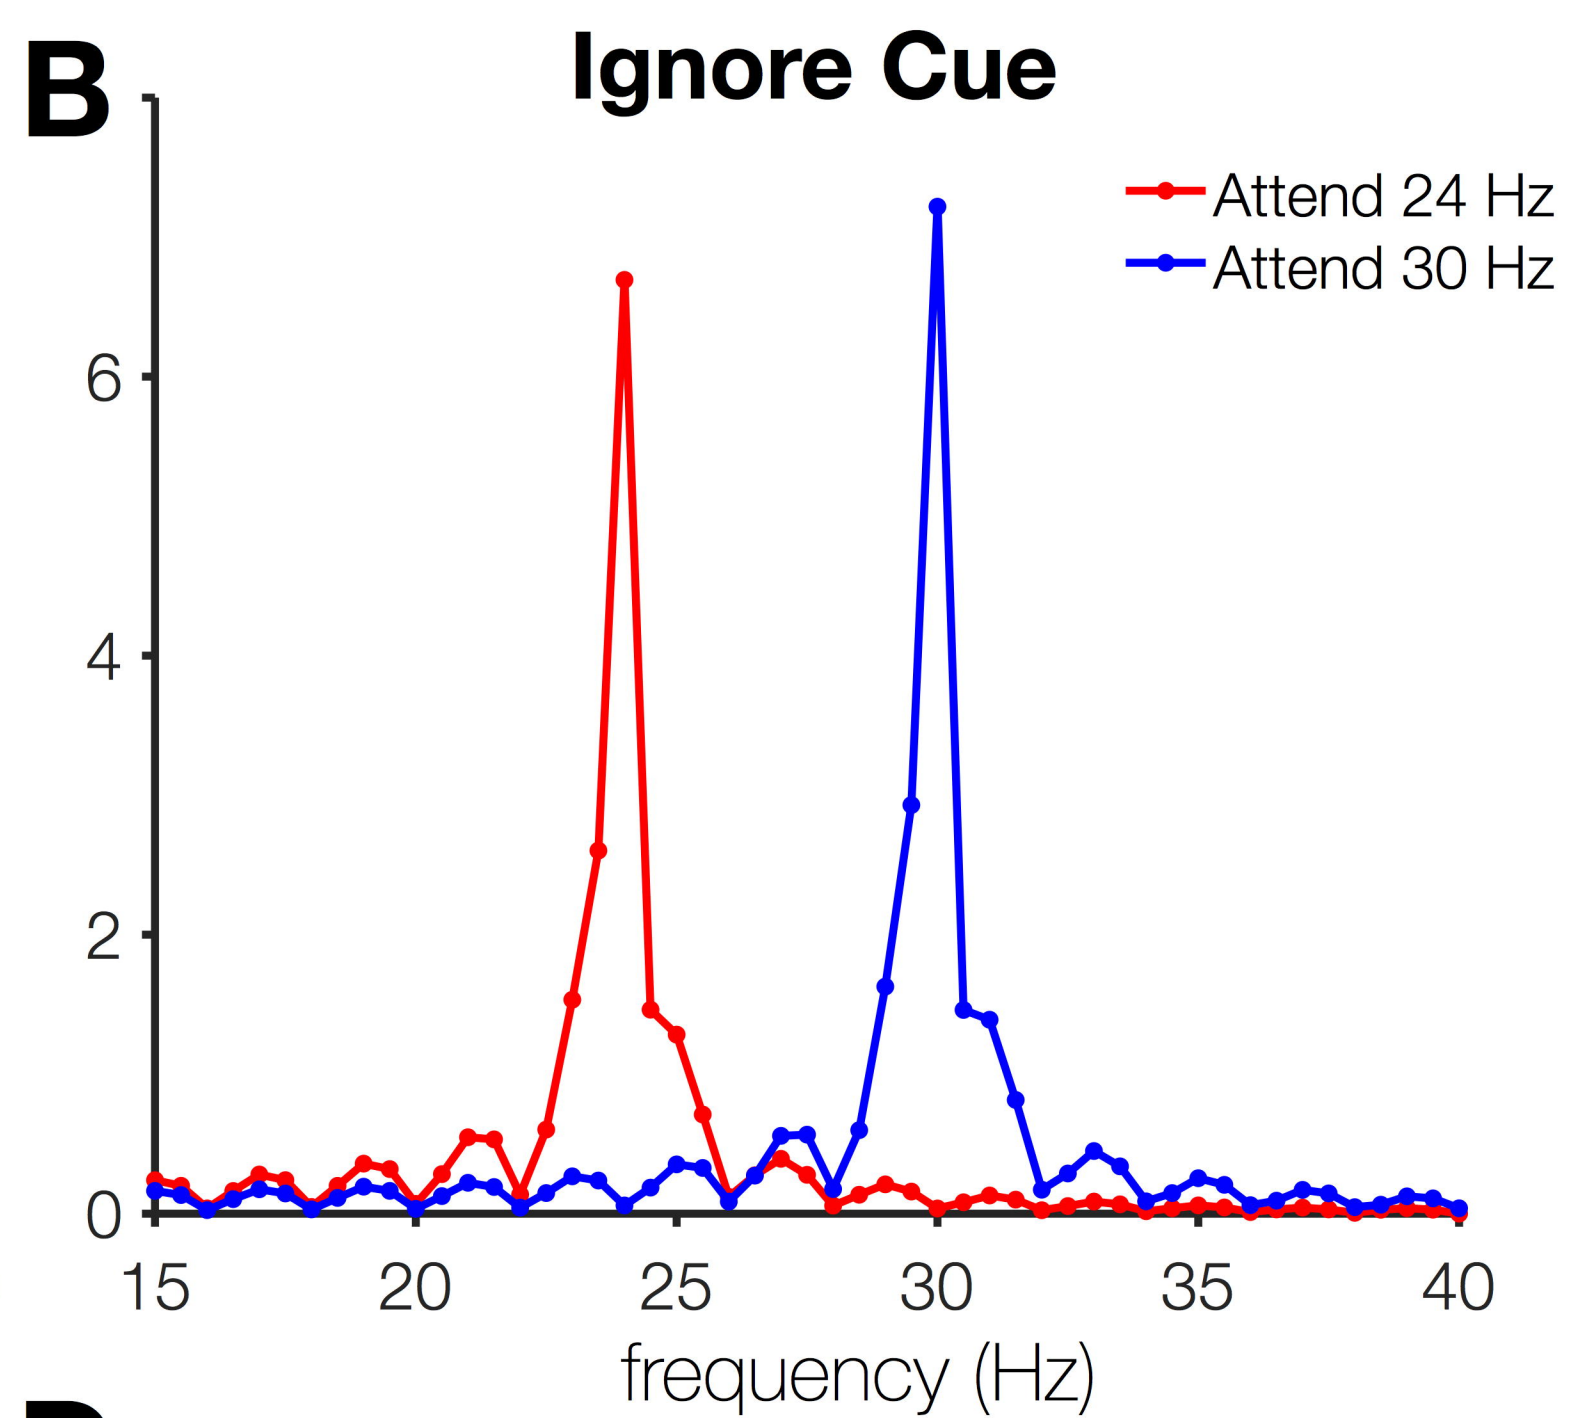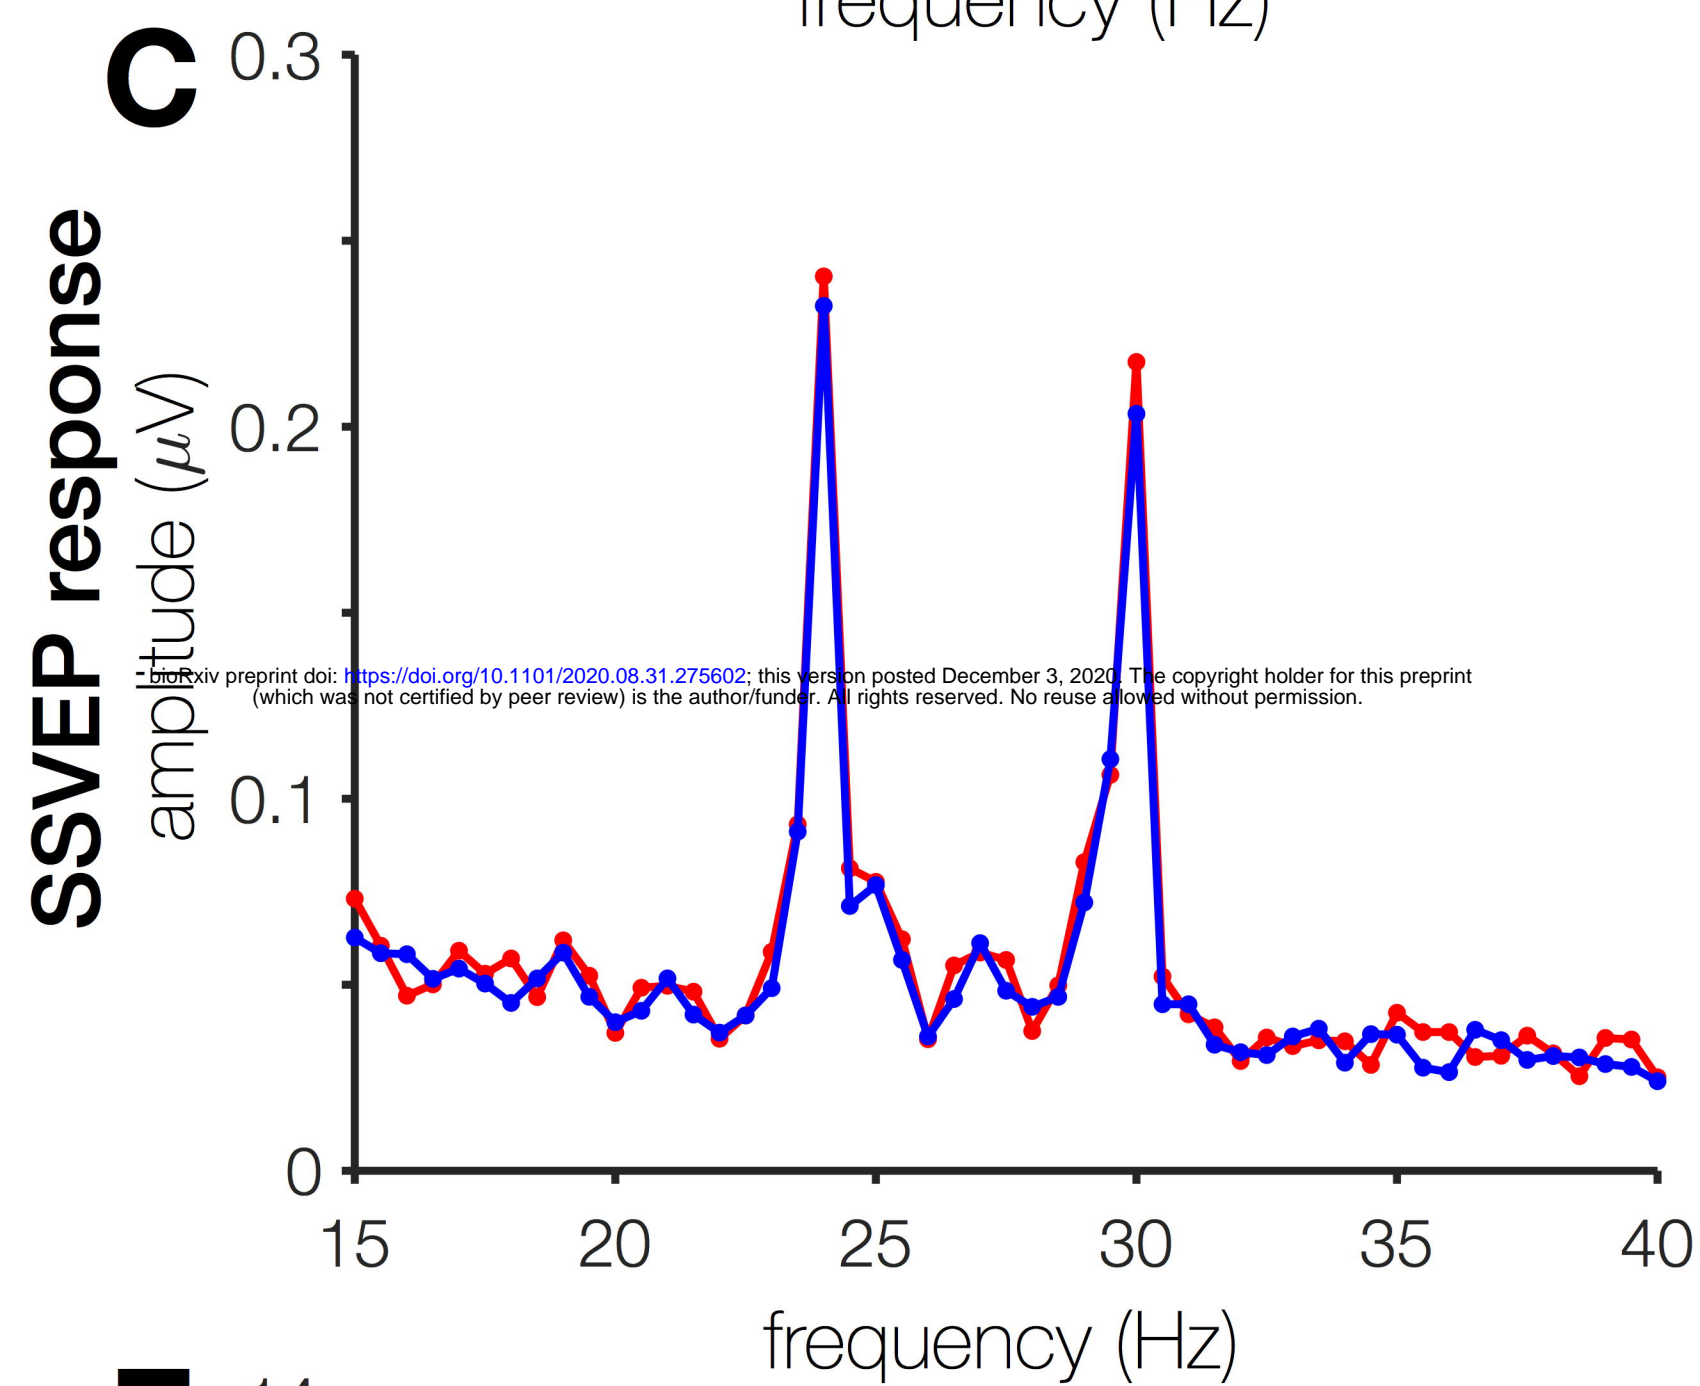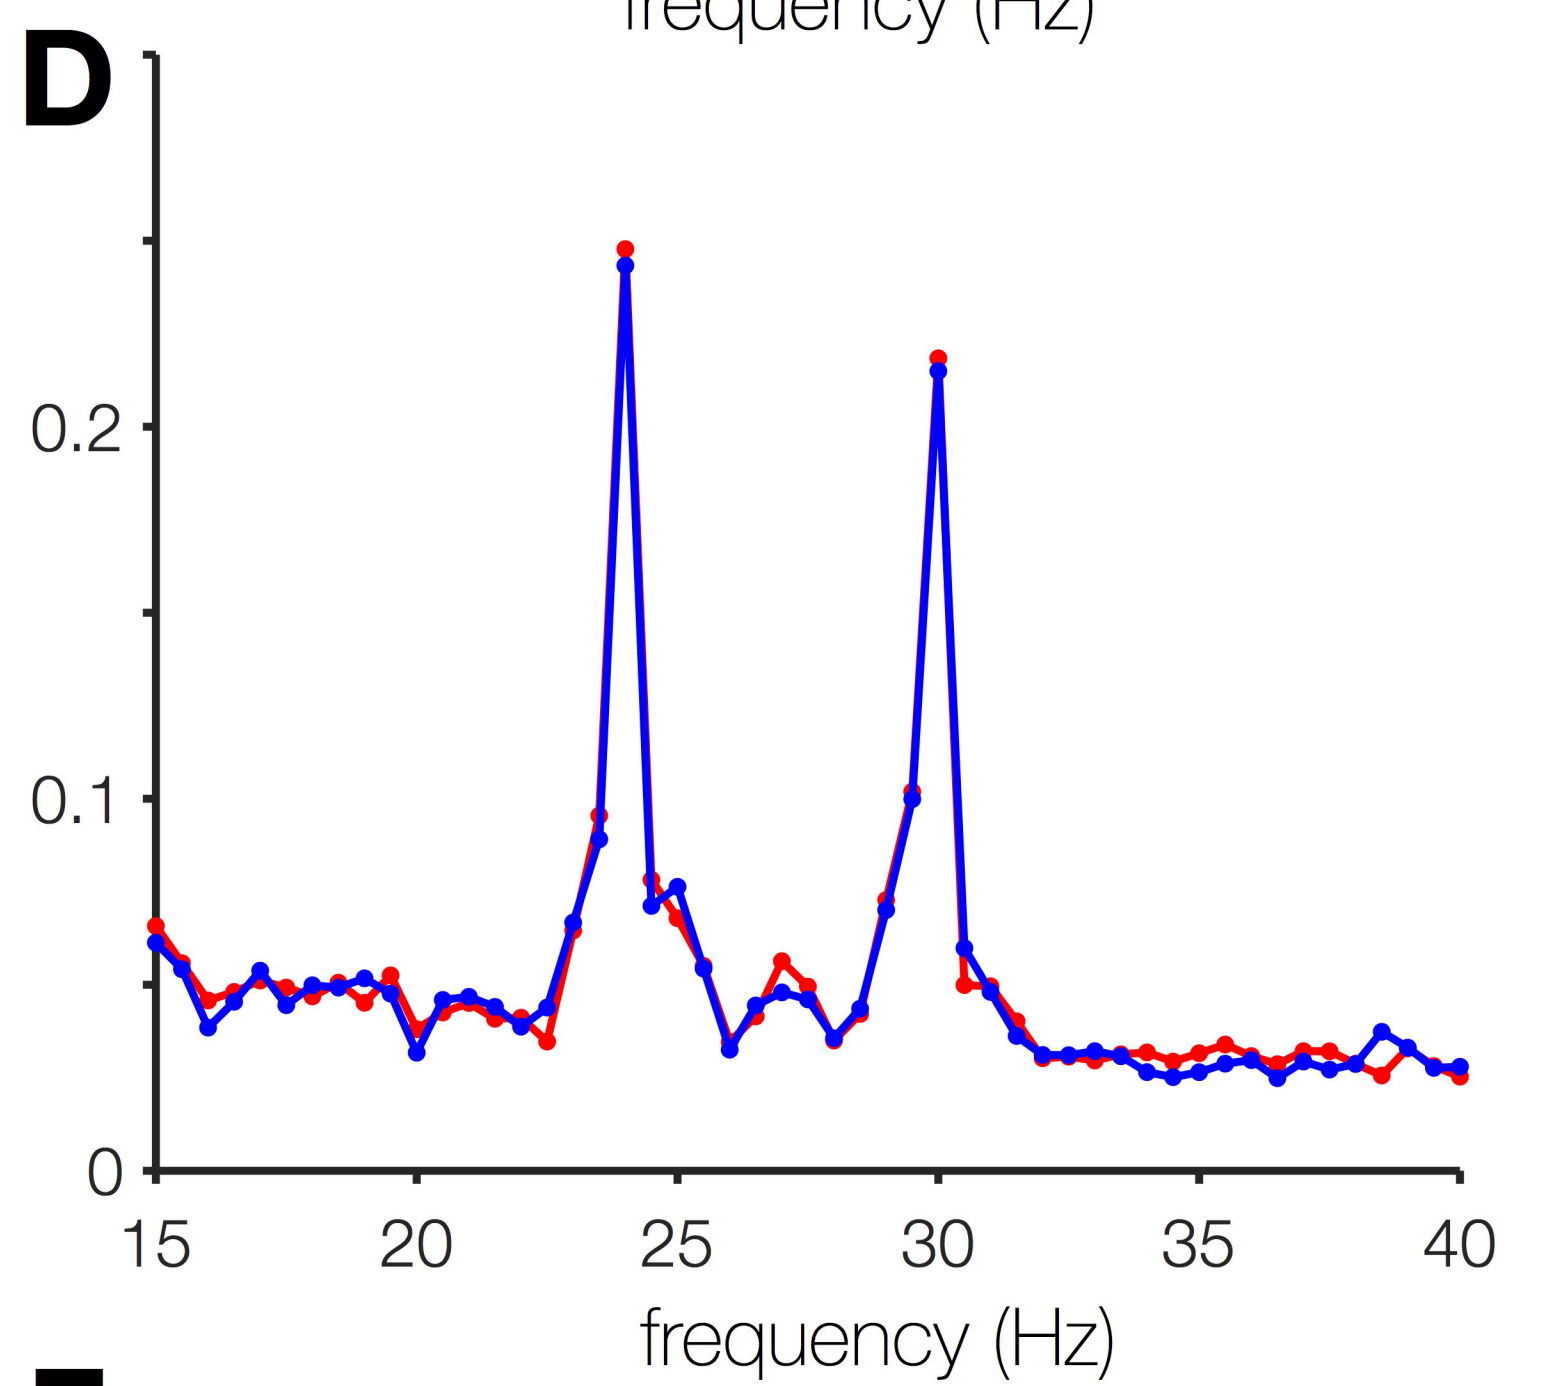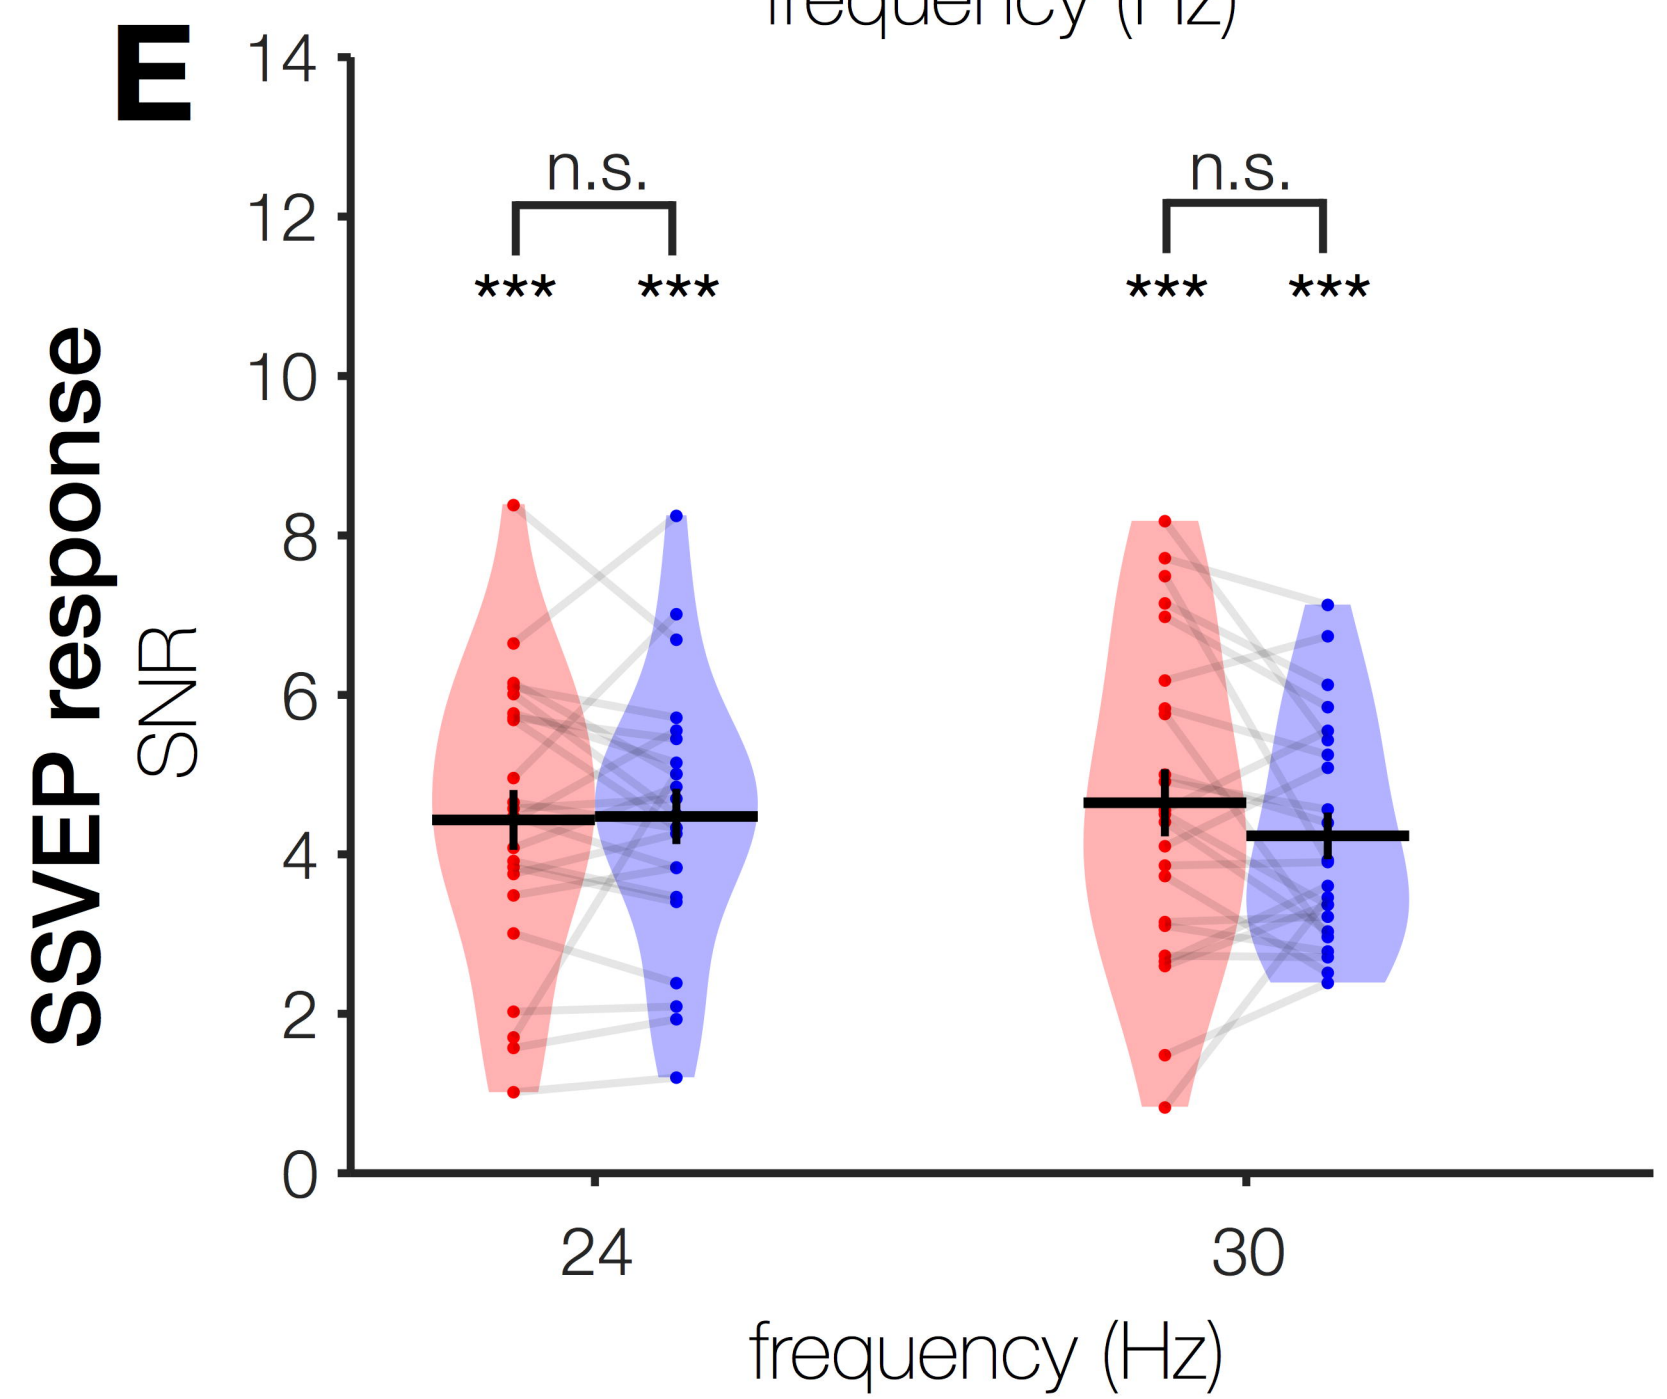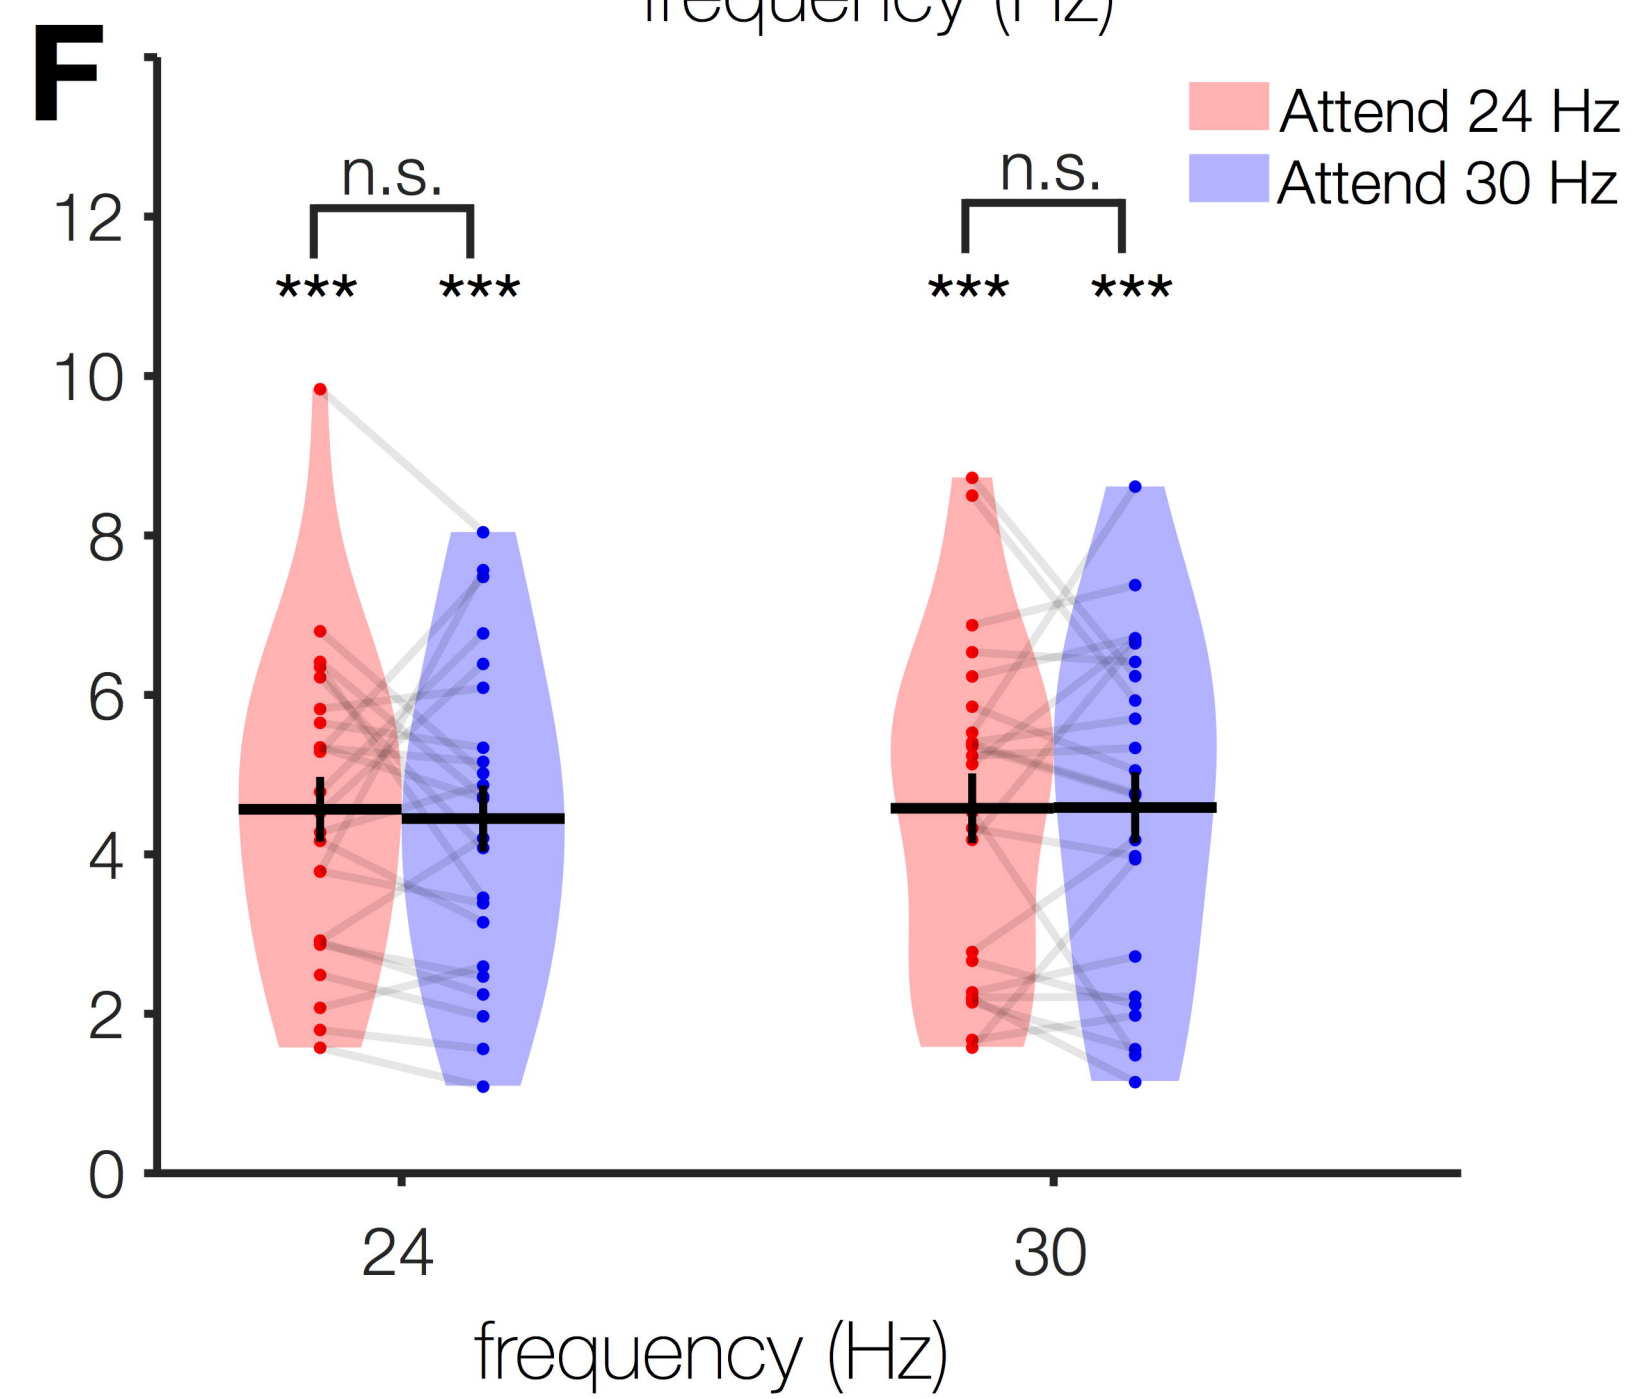

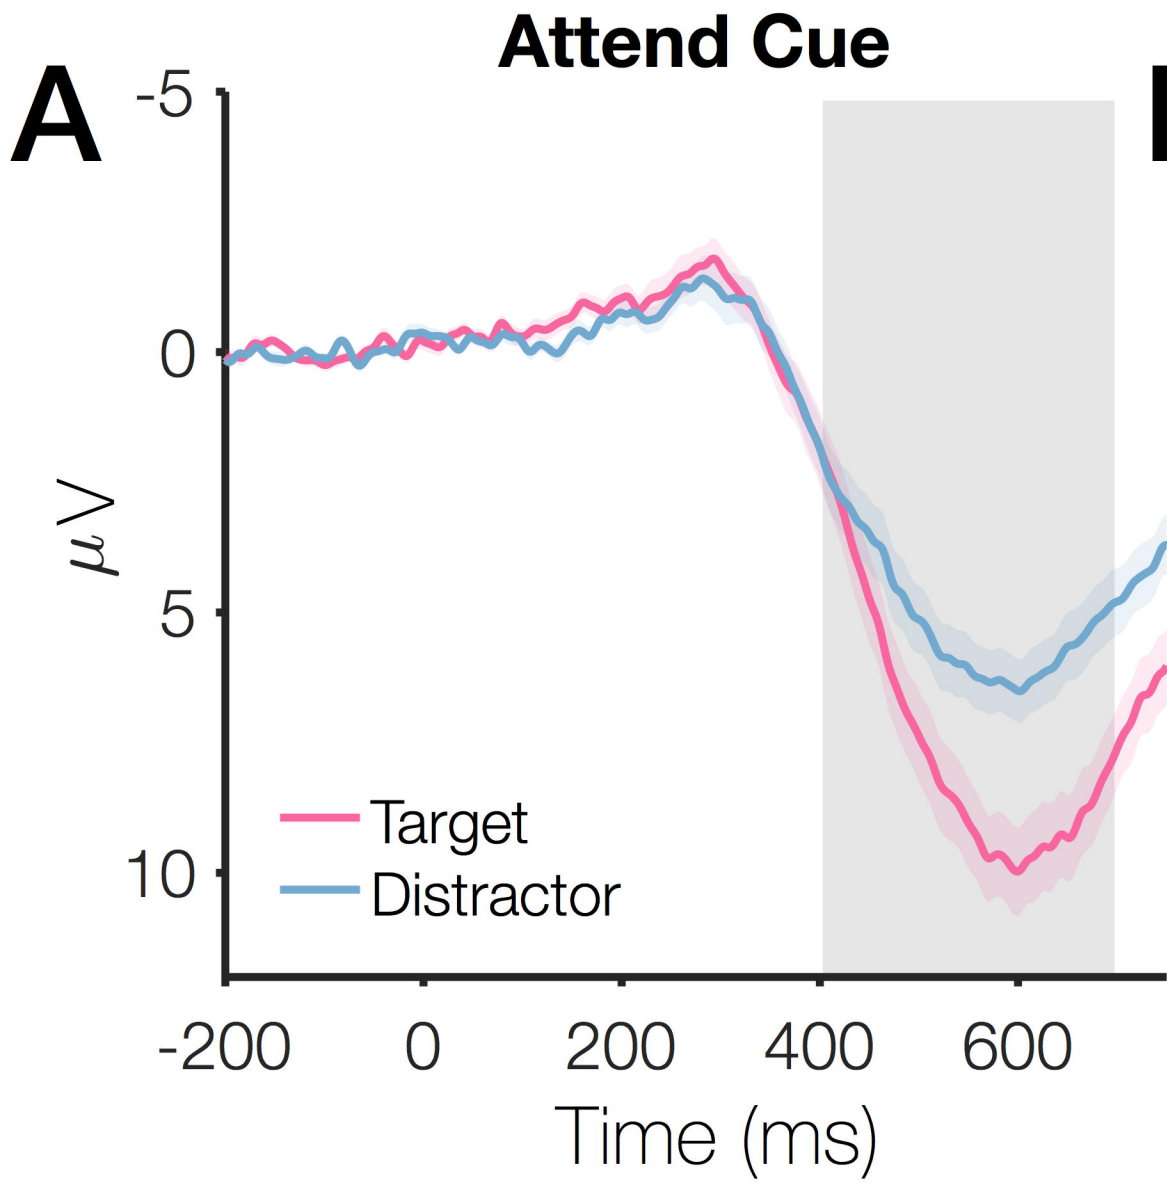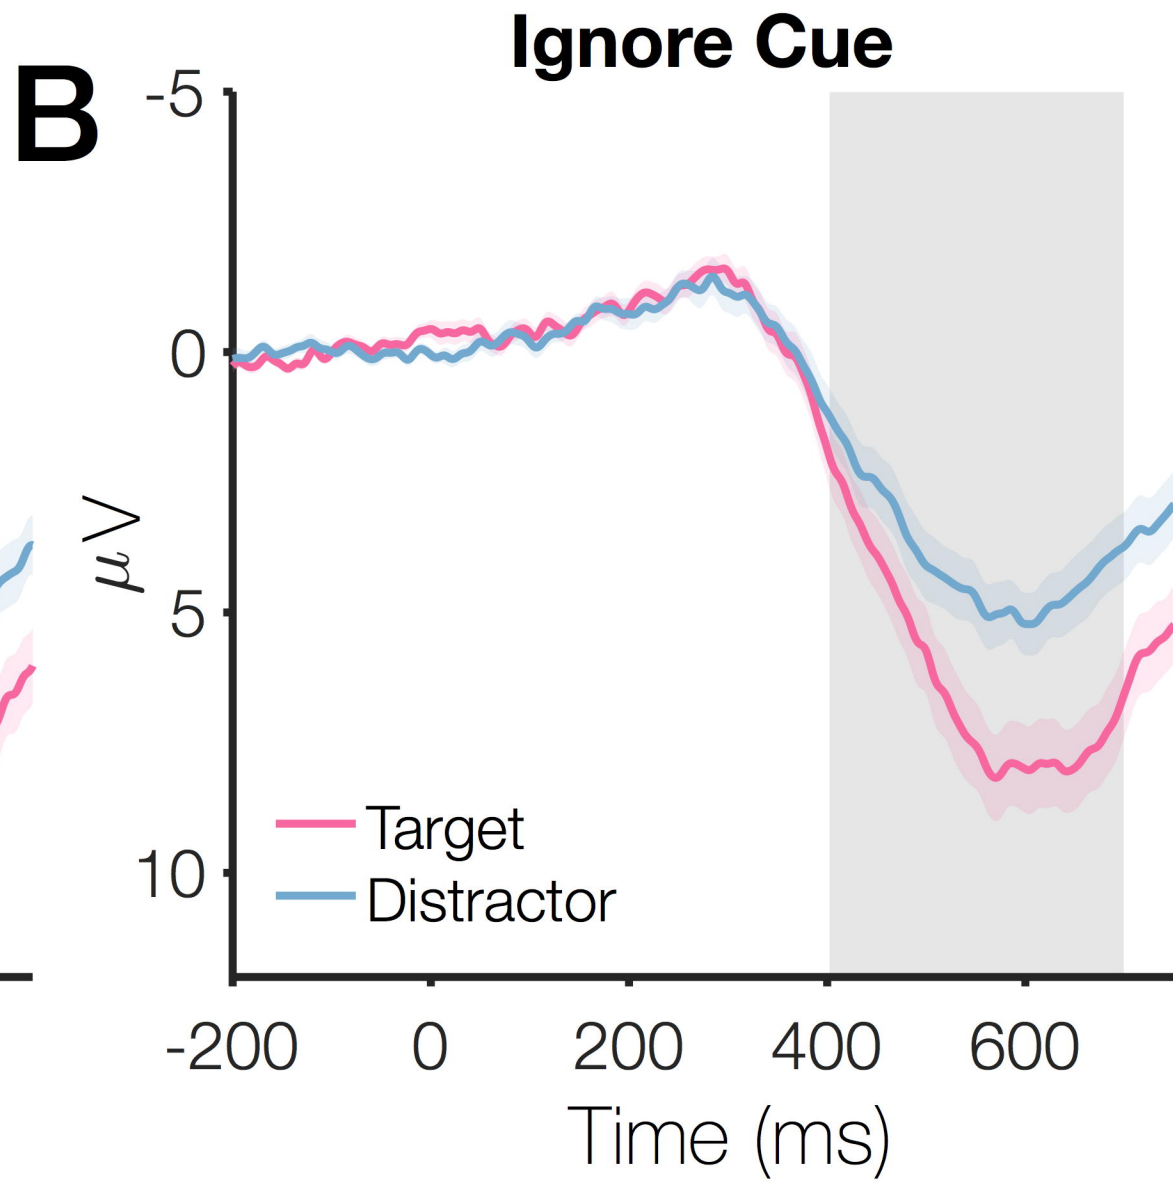



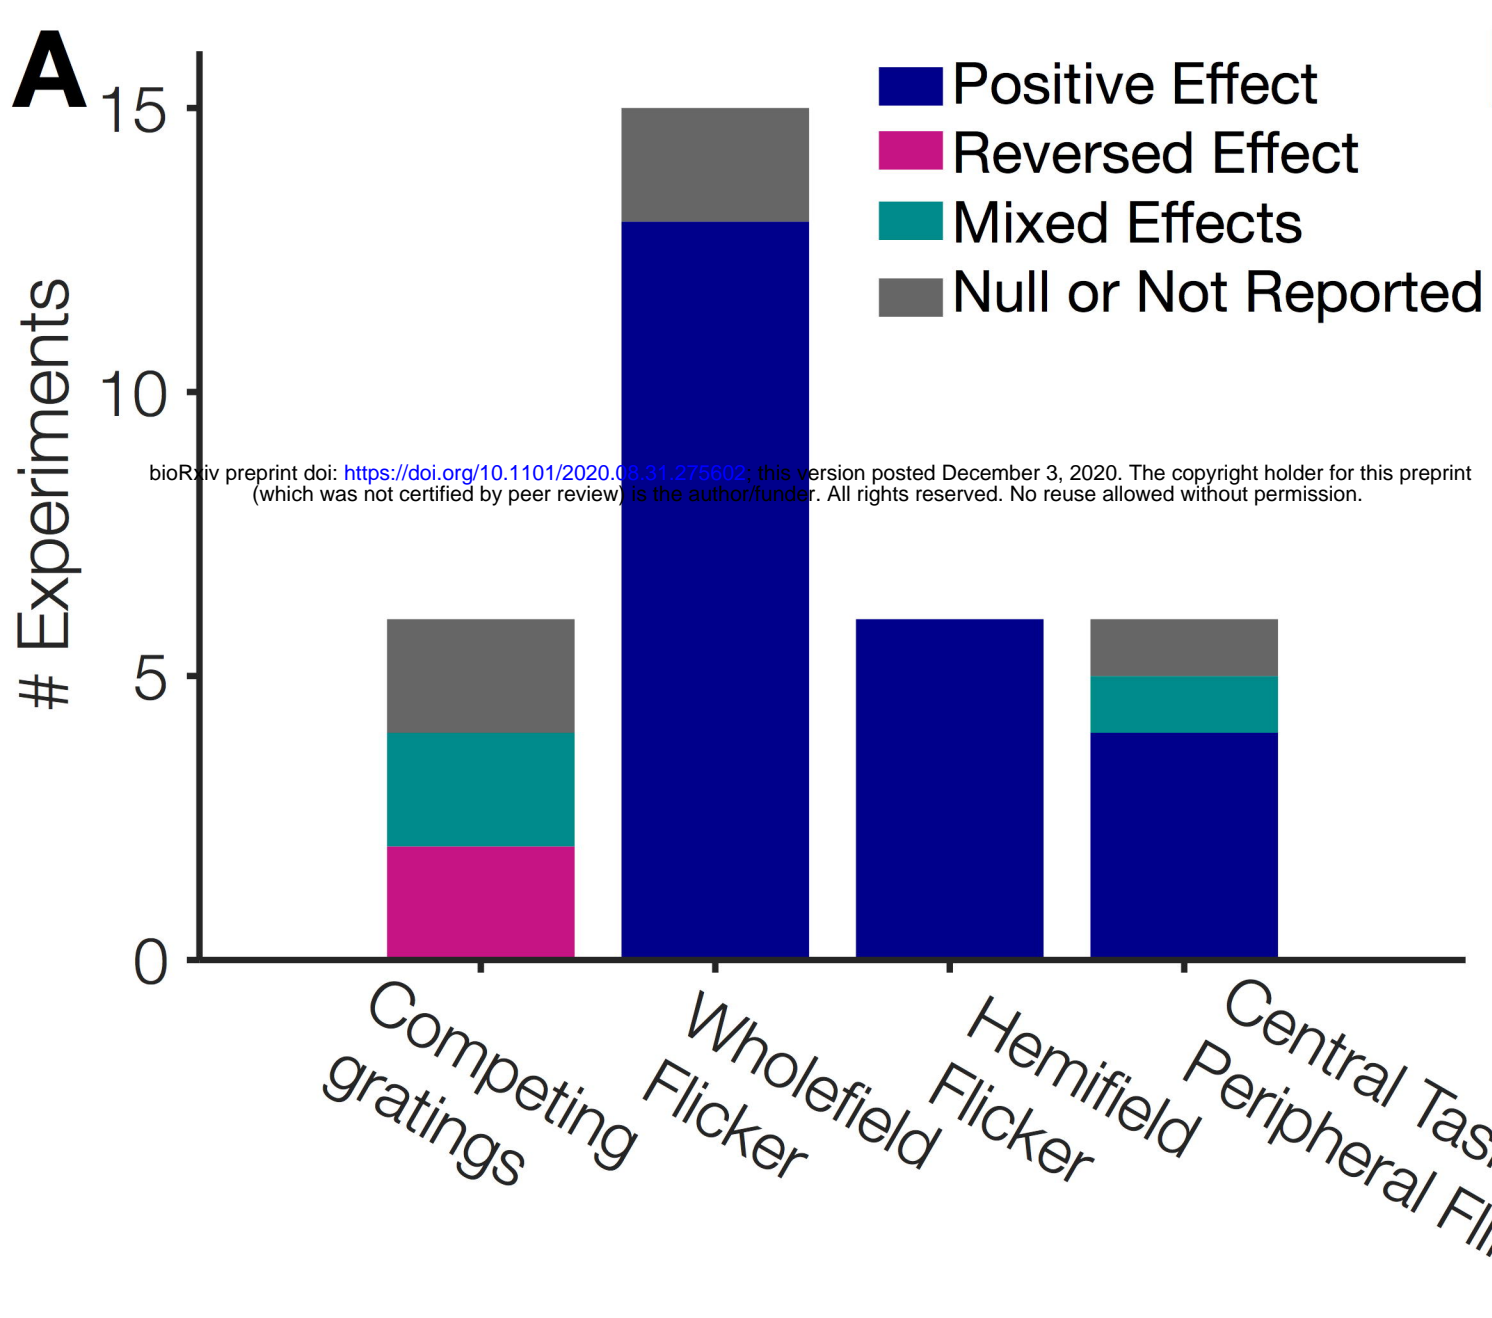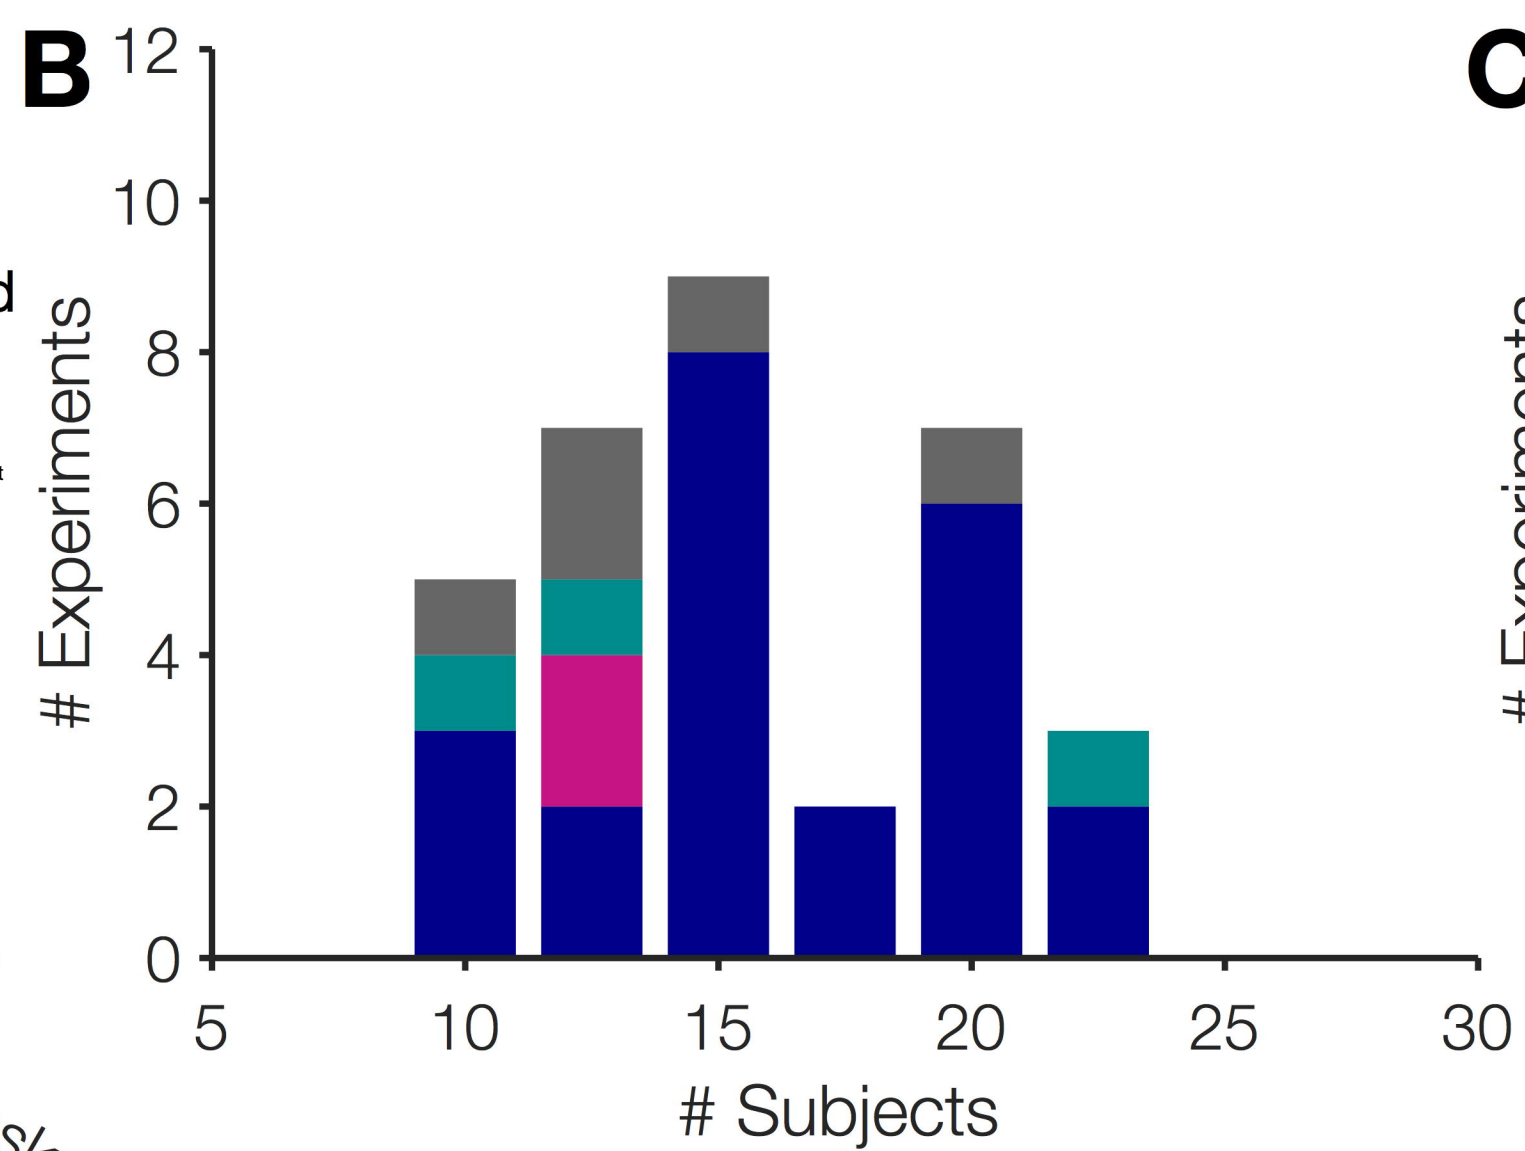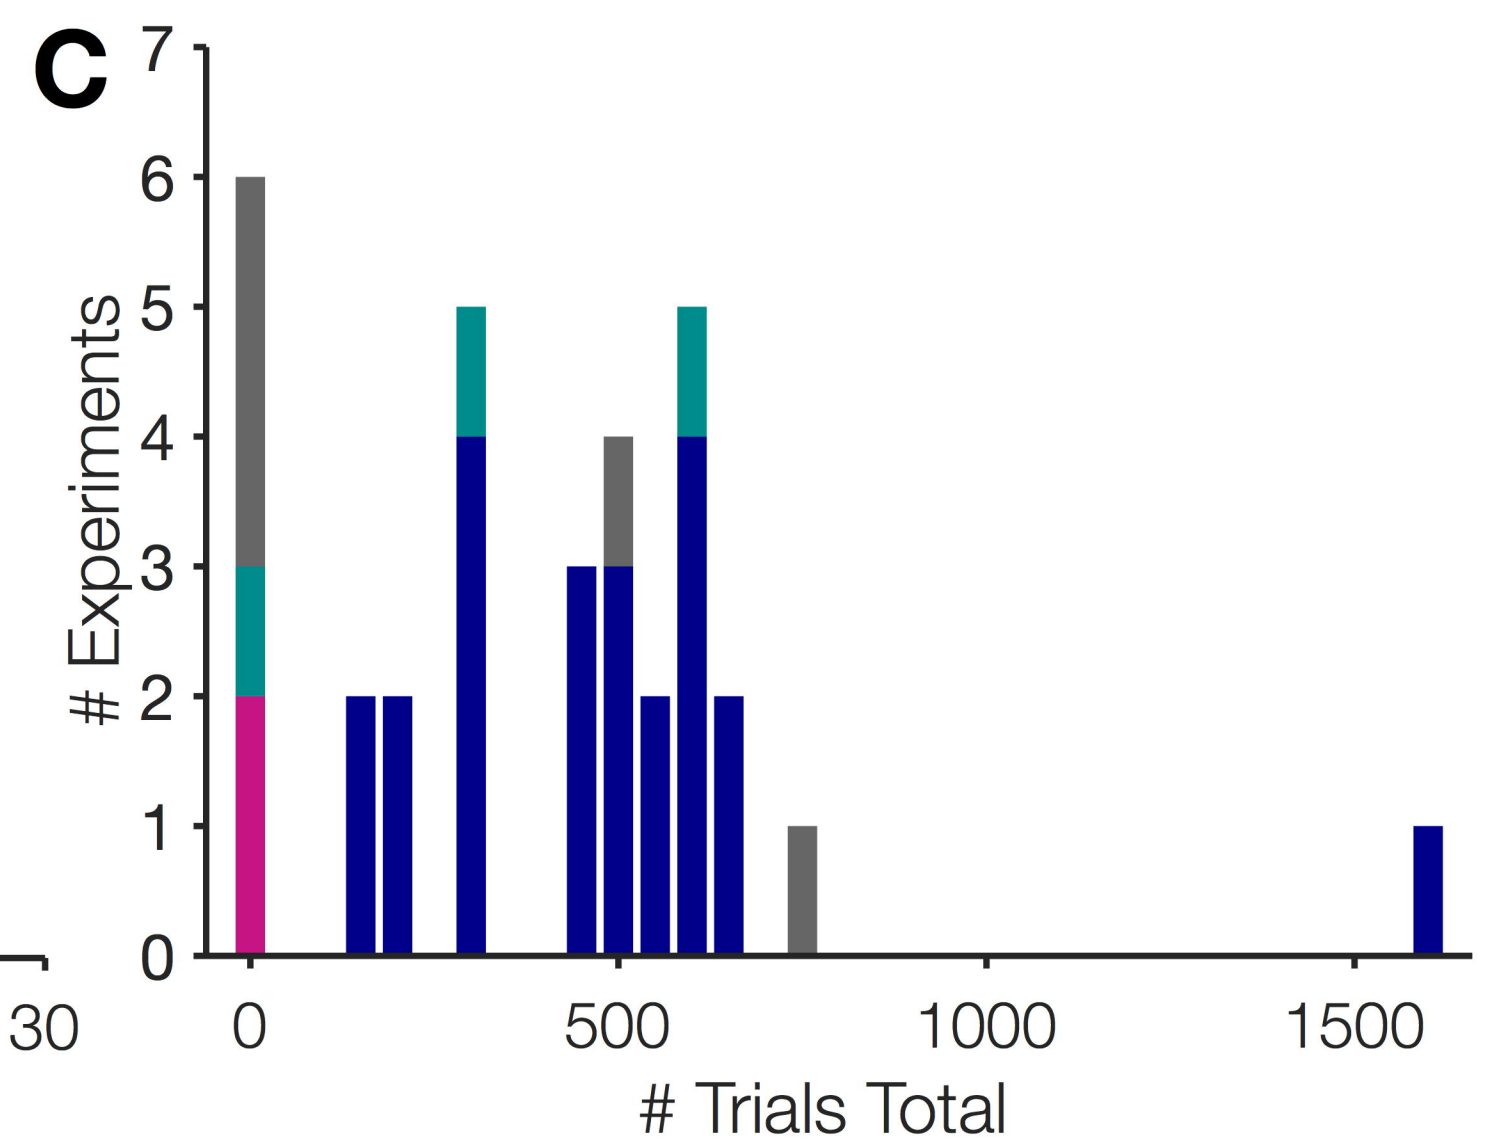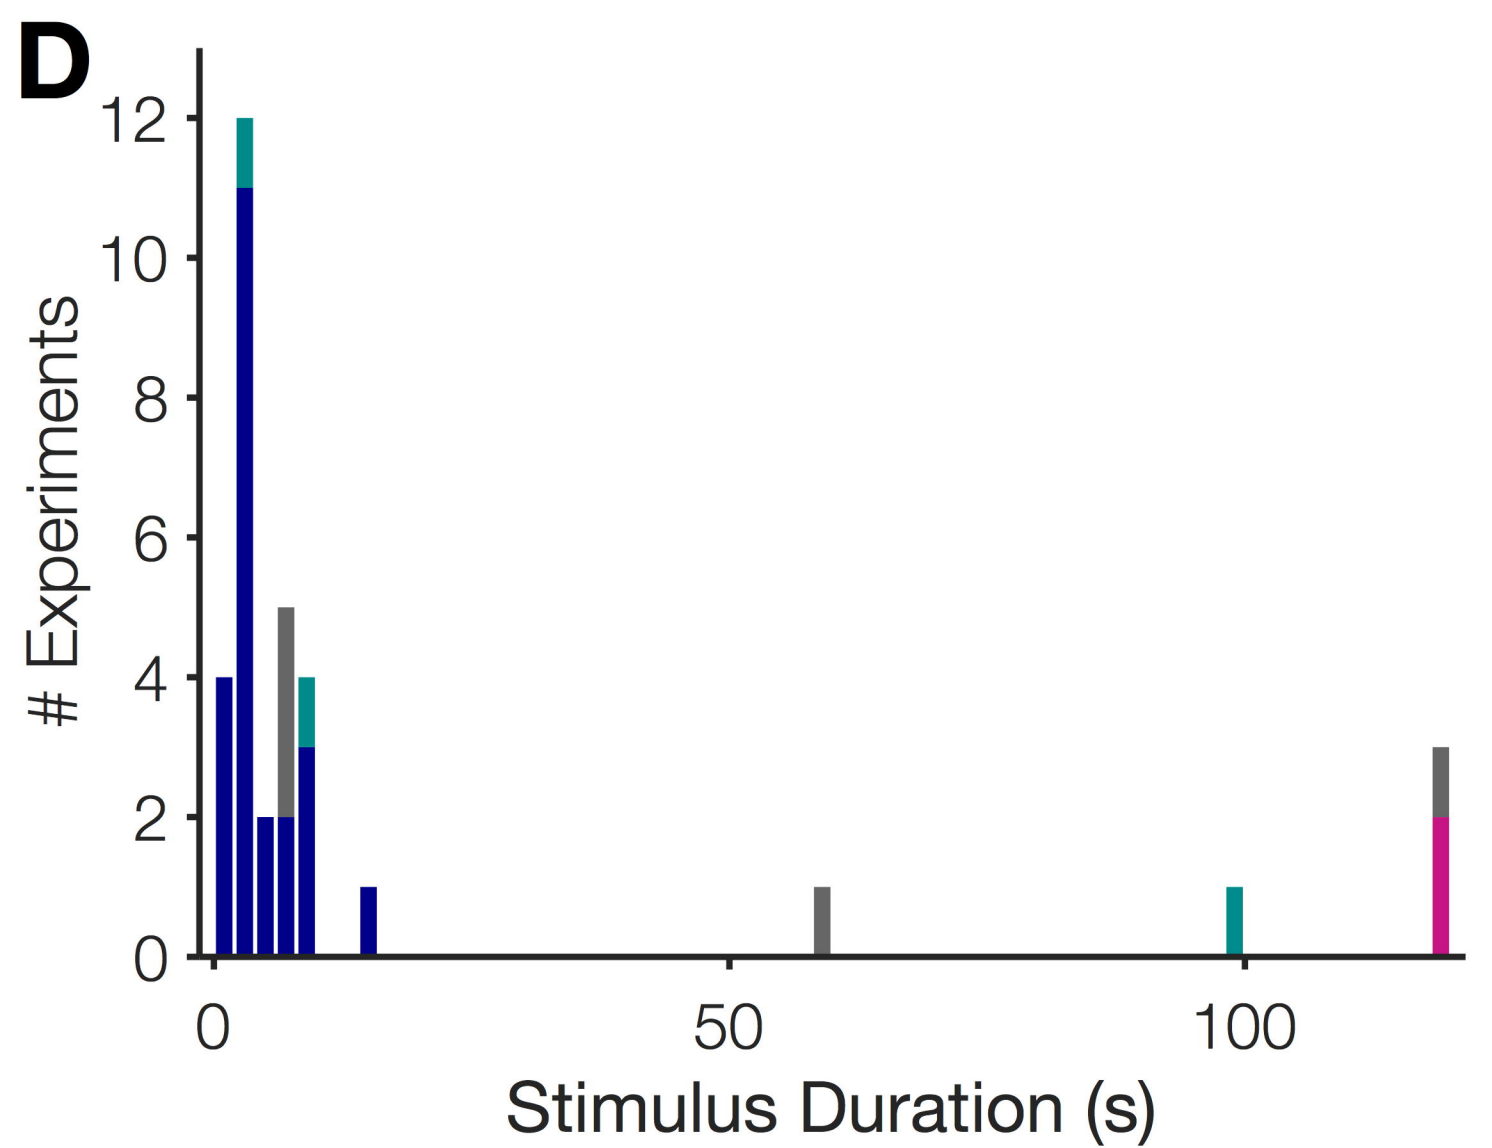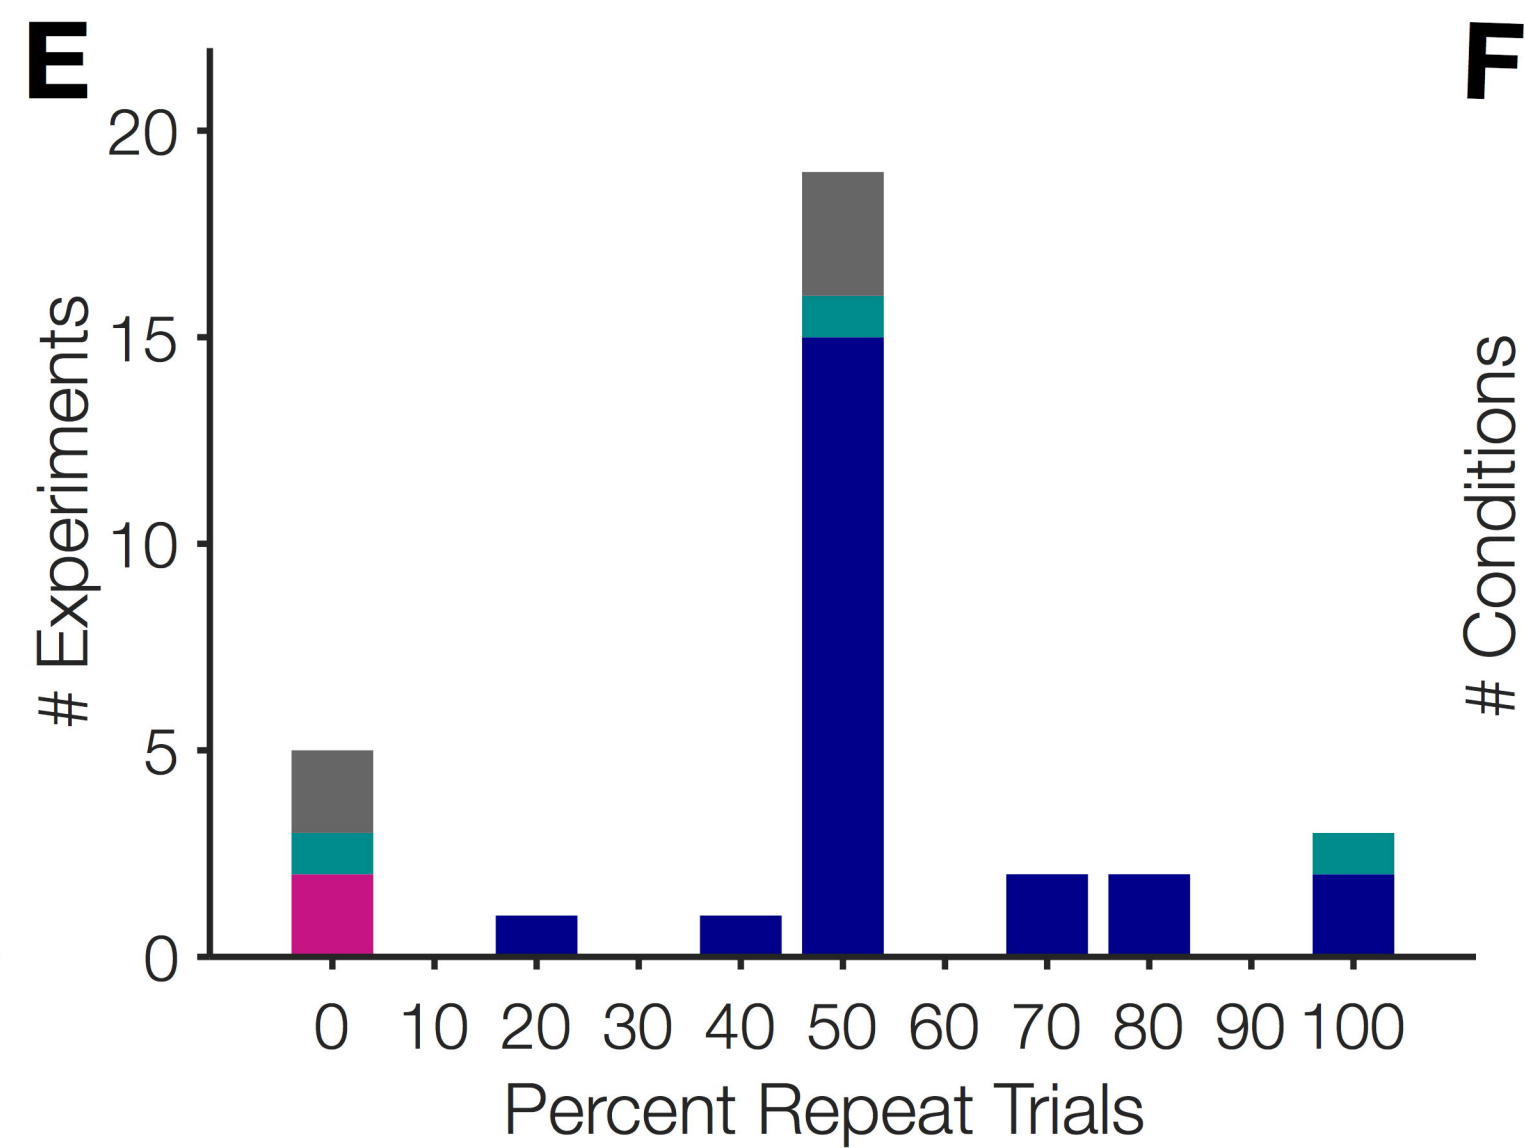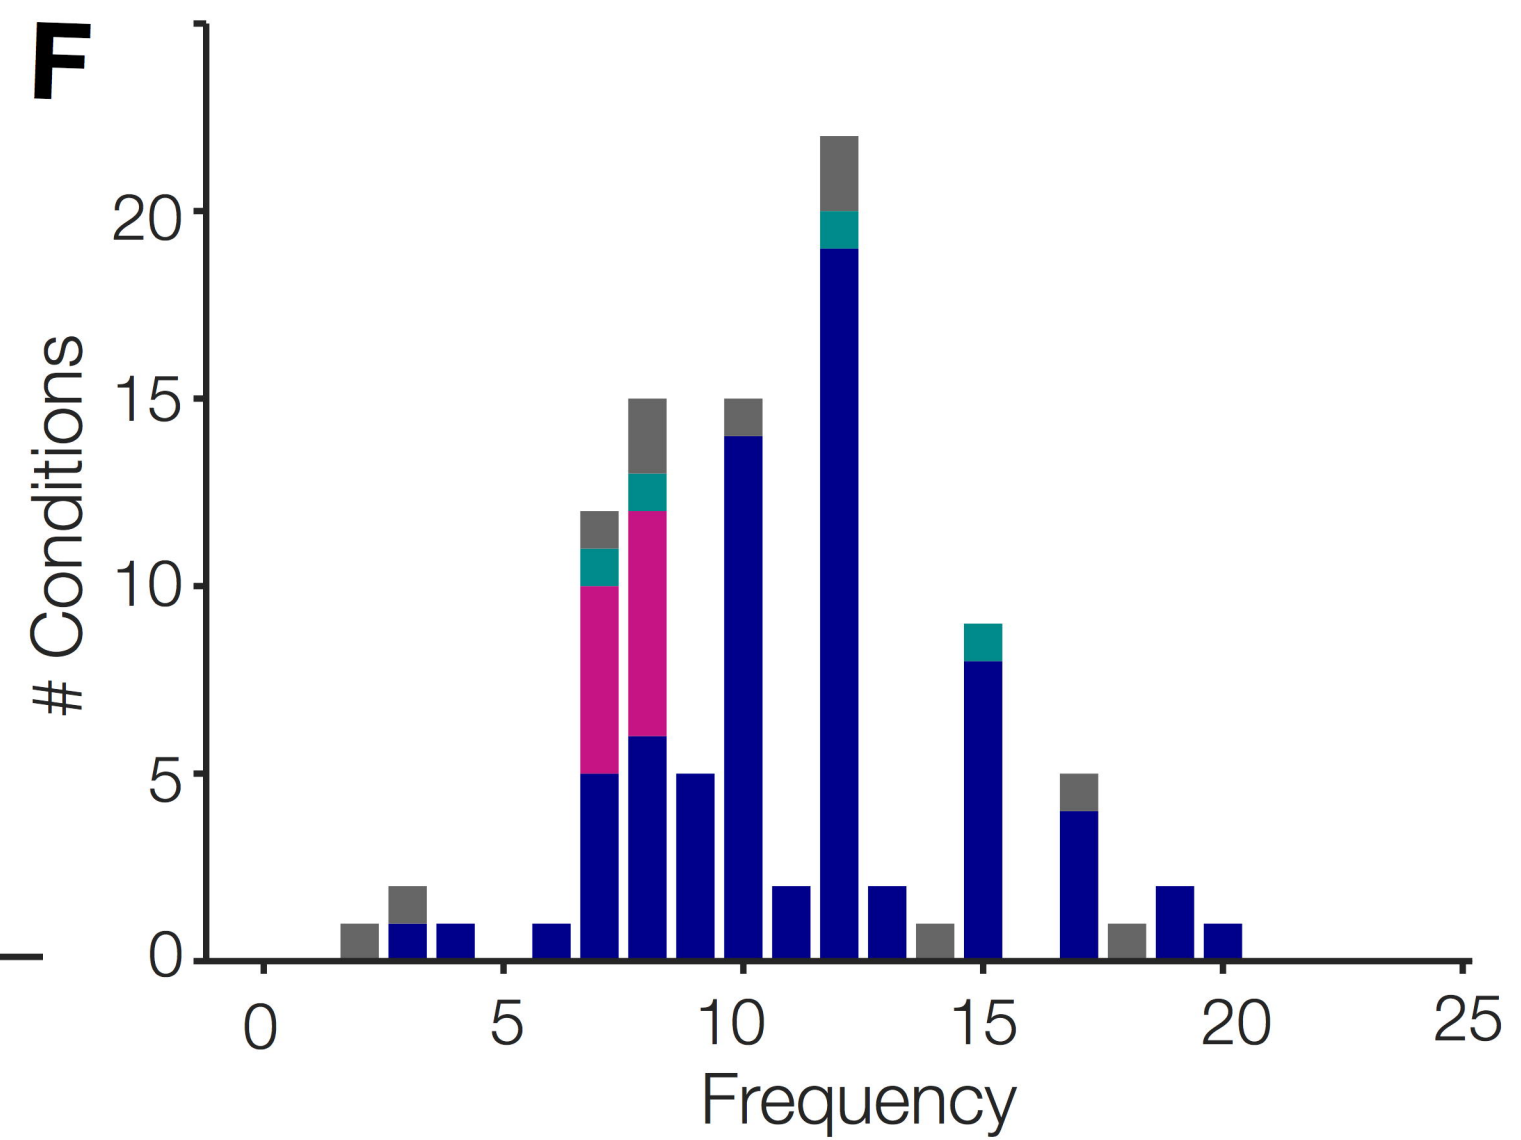

Source: https://www.biorxiv.org/content/10.1101/2020.08.31.275602v3.full.pdf
